# Supplementary material for: Medium- and large-sized mammals from Estação Biológica Fiocruz Mata Atlântica, Rio de Janeiro, south-eastern Brazil
Source: Biodivers Data J. 2022 Jul 25;10:e86756. doi: 10.3897/BDJ.10.e86756 (PMC9848567; doi:10.3897/BDJ.10.e86756)
Supplement: Supplementary material 1 — Individualised records of mammals from Fiocruz Atlantic Forest [file bdj-10-e86756-s001.xlsx]

## Sheet: Records per hour
N	Year	Month	Day	Date	Time	Species	Vernacular name	N of animals	Locality	Longitude	Latitude	Datum	Altitude	Habitat	Photo ID
1	2019	1	16	2019-01-16	01:06:35	Cerdocyon thous	Crab-eating fox	1	A14	663.75	7.462.750	Sirgas 2000	80m	Peridomicile	01160003
2	2019	1	17	2019-01-17	02:21:13	Dasypus novemcinctus	Nine-banded armadillo	1	A14	663.75	7.462.750	Sirgas 2000	80m	Peridomicile	01170013
3	2019	1	17	2019-01-17	10:28:43	Canis familiaris	Domestic dog	1	A14	663.75	7.462.750	Sirgas 2000	80m	Peridomicile	01170027
4	2019	1	22	2019-01-22	03:49:25	Dasypus novemcinctus	Nine-banded armadillo	1	A14	663.75	7.462.750	Sirgas 2000	80m	Peridomicile	01220072
5	2019	1	25	2019-01-25	05:26:28	Dasypus novemcinctus	Nine-banded armadillo	1	A14	663.75	7.462.750	Sirgas 2000	80m	Peridomicile	01250106
6	2019	1	27	2019-01-27	10:27:44	Canis familiaris	Domestic dog	2	A14	663.75	7.462.750	Sirgas 2000	80m	Peridomicile	01270127
7	2019	1	28	2019-01-28	02:47:59	Tamandua tetradactyla	Southern tamandua	1	A14	663.75	7.462.750	Sirgas 2000	80m	Peridomicile	01280131
8	2019	1	30	2019-01-30	00:31:52	Didelphis aurita	Big-eared opossum	1	A14	663.75	7.462.750	Sirgas 2000	80m	Peridomicile	01300152
9	2019	1	31	2019-01-31	07:05:21	Felis catus	Domestic cat	1	A14	663.75	7.462.750	Sirgas 2000	80m	Peridomicile	01310195
10	2019	1	31	2019-01-31	22:28:01	Didelphis aurita	Big-eared opossum	1	A14	663.75	7.462.750	Sirgas 2000	80m	Peridomicile	01310206
11	2019	2	1	2019-02-01	05:33:14	Felis catus	Domestic cat	1	A14	663.75	7.462.750	Sirgas 2000	80m	Peridomicile	02010211
12	2019	2	5	2019-02-05	22:25:45	Dasypus novemcinctus	Nine-banded armadillo	1	A14	663.75	7.462.750	Sirgas 2000	80m	Peridomicile	02050231
13	2019	2	7	2019-02-07	04:04:27	Tamandua tetradactyla	Southern tamandua	1	A14	663.75	7.462.750	Sirgas 2000	80m	Peridomicile	02070236
14	2019	2	8	2019-02-08	04:51:23	Didelphis aurita	Big-eared opossum	1	A14	663.75	7.462.750	Sirgas 2000	80m	Peridomicile	02080243
15	2019	3	23	2019-03-23	02:50:36	Didelphis aurita	Big-eared opossum	1	A14	663.75	7.462.750	Sirgas 2000	80m	Peridomicile	03230021
18	2019	3	31	2019-03-31	19:34:01	Didelphis aurita	Big-eared opossum	2	A14	663.75	7.462.750	Sirgas 2000	80m	Peridomicile	03310198
19	2019	4	2	2019-04-02	19:23:32	Didelphis aurita	Big-eared opossum	1	A14	663.75	7.462.750	Sirgas 2000	80m	Peridomicile	04020233
20	2019	4	3	2019-04-03	00:21:17	Didelphis aurita	Big-eared opossum	1	A14	663.75	7.462.750	Sirgas 2000	80m	Peridomicile	04030239
21	2019	4	3	2019-04-03	22:54:04	Canis familiaris	Domestic dog	1	A14	663.75	7.462.750	Sirgas 2000	80m	Peridomicile	04030271
22	2019	4	5	2019-04-05	19:26:43	Didelphis aurita	Big-eared opossum	1	A14	663.75	7.462.750	Sirgas 2000	80m	Peridomicile	04050315
23	2019	4	8	2019-04-08	05:22:06	Didelphis aurita	Big-eared opossum	1	A14	663.75	7.462.750	Sirgas 2000	80m	Peridomicile	04080401
24	2019	4	9	2019-04-09	07:06:23	Didelphis aurita	Big-eared opossum	1	A14	663.75	7.462.750	Sirgas 2000	80m	Peridomicile	04090437
25	2019	4	10	2019-04-10	06:03:18	Didelphis aurita	Big-eared opossum	1	A14	663.75	7.462.750	Sirgas 2000	80m	Peridomicile	04100449
26	2019	4	12	2019-04-12	02:58:50	Didelphis aurita	Big-eared opossum	1	A14	663.75	7.462.750	Sirgas 2000	80m	Peridomicile	04120475
27	2019	4	15	2019-04-15	19:11:01	Didelphis aurita	Big-eared opossum	1	A14	663.75	7.462.750	Sirgas 2000	80m	Peridomicile	04150486
28	2019	4	16	2019-04-16	01:20:14	Canis familiaris	Domestic dog	3	A14	663.75	7.462.750	Sirgas 2000	80m	Peridomicile	04160489
29	2019	4	18	2019-04-18	01:56:40	Canis familiaris	Domestic dog	1	A14	663.75	7.462.750	Sirgas 2000	80m	Peridomicile	04180494
30	2019	4	20	2019-04-20	19:14:19	Didelphis aurita	Big-eared opossum	1	A14	663.75	7.462.750	Sirgas 2000	80m	Peridomicile	04200497
31	2019	4	23	2019-04-23	05:21:12	Didelphis aurita	Big-eared opossum	1	A14	663.75	7.462.750	Sirgas 2000	80m	Peridomicile	04230501
32	2019	4	23	2019-04-23	23:59:28	Canis familiaris	Domestic dog	1	A14	663.75	7.462.750	Sirgas 2000	80m	Peridomicile	04230505
33	2019	5	3	2019-05-03	21:29:01	Dasypus novemcinctus	Nine-banded armadillo	1	A14	663.75	7.462.750	Sirgas 2000	80m	Peridomicile	05030566
34	2019	5	12	2019-05-12	00:55:00	Canis familiaris	Domestic dog	1	A14	663.75	7.462.750	Sirgas 2000	80m	Peridomicile	05120581
35	2019	5	16	2019-05-16	19:26:30	Didelphis aurita	Big-eared opossum	1	A14	663.75	7.462.750	Sirgas 2000	80m	Peridomicile	05160610
36	2019	5	19	2019-05-19	04:37:44	Canis familiaris	Domestic dog	1	A14	663.75	7.462.750	Sirgas 2000	80m	Peridomicile	05190629
37	2019	5	20	2019-05-20	04:38:53	Didelphis aurita	Big-eared opossum	1	A14	663.75	7.462.750	Sirgas 2000	80m	Peridomicile	05200653
38	2019	5	25	2019-05-25	06:43:14	Didelphis aurita	Big-eared opossum	1	A14	663.75	7.462.750	Sirgas 2000	80m	Peridomicile	05250657
39	2019	5	30	2019-05-30	17:53:13	Didelphis aurita	Big-eared opossum	1	A14	663.75	7.462.750	Sirgas 2000	80m	Peridomicile	05300289
40	2019	6	1	2019-06-01	04:24:17	Didelphis aurita	Big-eared opossum	1	A14	663.75	7.462.750	Sirgas 2000	80m	Peridomicile	06010308
41	2019	6	4	2019-06-04	02:41:28	Canis familiaris	Domestic dog	1	A14	663.75	7.462.750	Sirgas 2000	80m	Peridomicile	06040324
42	2019	6	5	2019-06-05	22:38:54	Didelphis aurita	Big-eared opossum	1	A14	663.75	7.462.750	Sirgas 2000	80m	Peridomicile	06050340
43	2019	6	7	2019-06-07	00:06:32	Canis familiaris	Domestic dog	1	A14	663.75	7.462.750	Sirgas 2000	80m	Peridomicile	06070358
44	2019	6	9	2019-06-09	23:40:05	Dasypus novemcinctus	Nine-banded armadillo	1	A14	663.75	7.462.750	Sirgas 2000	80m	Peridomicile	06090401
45	2019	6	20	2019-06-20	15:36:36	Canis familiaris	Domestic dog	2	A14	663.75	7.462.750	Sirgas 2000	80m	Peridomicile	06200488
46	2019	6	20	2019-06-20	19:51:50	Dasypus novemcinctus	Nine-banded armadillo	1	A14	663.75	7.462.750	Sirgas 2000	80m	Peridomicile	06200493
47	2019	6	21	2019-06-21	21:30:29	Didelphis aurita	Big-eared opossum	1	A14	663.75	7.462.750	Sirgas 2000	80m	Peridomicile	06210498
48	2019	6	24	2019-06-24	22:06:22	Canis familiaris	Domestic dog	1	A14	663.75	7.462.750	Sirgas 2000	80m	Peridomicile	06240512
49	2019	6	25	2019-06-25	01:00:18	Didelphis aurita	Big-eared opossum	1	A14	663.75	7.462.750	Sirgas 2000	80m	Peridomicile	06250520
50	2019	6	25	2019-06-25	19:12:26	Dasypus novemcinctus	Nine-banded armadillo	1	A14	663.75	7.462.750	Sirgas 2000	80m	Peridomicile	06250534
51	2019	6	29	2019-06-29	17:10:28	Felis catus	Domestic cat	1	A14	663.75	7.462.750	Sirgas 2000	80m	Peridomicile	06290536
52	2018	11	14	2018-11-14	22:28:31	Didelphis aurita	Big-eared opossum	1	B13	663.5	7.462.500	Sirgas 2000	25m	Peridomicile	1140009
53	2018	11	16	2018-11-16	01:37:54	Tamandua tetradactyla	Southern tamandua	1	B13	663.5	7.462.500	Sirgas 2000	25m	Peridomicile	11160017
54	2018	11	21	2018-11-21	18:33:32	Felis catus	Domestic cat	1	B13	663.5	7.462.500	Sirgas 2000	25m	Peridomicile	11210028
55	2018	11	22	2018-11-22	04:43:37	Didelphis aurita	Big-eared opossum	1	B13	663.5	7.462.500	Sirgas 2000	25m	Peridomicile	11220034
56	2018	11	24	2018-11-24	03:36:55	Didelphis aurita	Big-eared opossum	1	B13	663.5	7.462.500	Sirgas 2000	25m	Peridomicile	11240036
57	2018	11	27	2018-11-27	01:48:14	Didelphis aurita	Big-eared opossum	1	B13	663.5	7.462.500	Sirgas 2000	25m	Peridomicile	11270042
58	2018	11	27	2018-11-27	21:11:03	Felis catus	Domestic cat	1	B13	663.5	7.462.500	Sirgas 2000	25m	Peridomicile	11270052
59	2018	12	3	2018-12-03	00:16:38	Cerdocyon thous	Crab-eating fox	1	B13	663.5	7.462.500	Sirgas 2000	25m	Peridomicile	12030066
60	2018	12	8	2018-12-08	20:12:04	Cerdocyon thous	Crab-eating fox	1	B13	663.5	7.462.500	Sirgas 2000	25m	Peridomicile	12080080
61	2018	12	11	2018-12-11	03:22:29	Didelphis aurita	Big-eared opossum	1	B13	663.5	7.462.500	Sirgas 2000	25m	Peridomicile	12110081
62	2018	12	16	2018-12-16	19:39:21	Didelphis aurita	Big-eared opossum	1	B13	663.5	7.462.500	Sirgas 2000	25m	Peridomicile	12160110
63	2018	12	18	2018-12-18	22:02:00	Tamandua tetradactyla	Southern tamandua	1	B13	663.5	7.462.500	Sirgas 2000	25m	Peridomicile	12180112
64	2018	12	23	2018-12-23	03:09:02	Didelphis aurita	Big-eared opossum	1	B13	663.5	7.462.500	Sirgas 2000	25m	Peridomicile	12230114
66	2018	12	26	2018-12-26	09:07:45	Canis familiaris	Domestic dog	1	B13	663.5	7.462.500	Sirgas 2000	25m	Peridomicile	12260117
67	2018	12	27	2018-12-27	01:58:33	Cerdocyon thous	Crab-eating fox	1	B13	663.5	7.462.500	Sirgas 2000	25m	Peridomicile	12270129
68	2018	12	27	2018-12-27	10:19:15	Canis familiaris	Domestic dog	3	B13	663.5	7.462.500	Sirgas 2000	25m	Peridomicile	12270151
69	2018	12	28	2018-12-28	11:57:41	Felis catus	Domestic cat	1	B13	663.5	7.462.500	Sirgas 2000	25m	Peridomicile	12280157
70	2018	12	31	2018-12-31	20:57:08	Didelphis aurita	Big-eared opossum	1	B13	663.5	7.462.500	Sirgas 2000	25m	Peridomicile	12310171
71	2018	12	31	2018-12-31	23:55:22	Didelphis aurita	Big-eared opossum	1	B13	663.5	7.462.500	Sirgas 2000	25m	Peridomicile	12310177
72	2019	1	1	2019-01-01	23:58:40	Dasypus novemcinctus	Nine-banded armadillo	1	B13	663.5	7.462.500	Sirgas 2000	25m	Peridomicile	1010191
73	2019	1	4	2019-01-04	04:40:15	Didelphis aurita	Big-eared opossum	1	B13	663.5	7.462.500	Sirgas 2000	25m	Peridomicile	1040201
74	2019	1	5	2019-01-05	03:33:03	Didelphis aurita	Big-eared opossum	1	B13	663.5	7.462.500	Sirgas 2000	25m	Peridomicile	1050208
75	2019	1	8	2019-01-08	01:51:04	Didelphis aurita	Big-eared opossum	1	B13	663.5	7.462.500	Sirgas 2000	25m	Peridomicile	1080226
76	2019	1	15	2019-01-15	19:56:34	Didelphis aurita	Big-eared opossum	1	B13	663.5	7.462.500	Sirgas 2000	25m	Peridomicile	01150120
77	2019	1	16	2019-01-16	12:55:35	Canis familiaris	Domestic dog	1	B13	663.5	7.462.500	Sirgas 2000	25m	Peridomicile	01160129
78	2019	1	17	2019-01-17	23:58:35	Didelphis aurita	Big-eared opossum	1	B13	663.5	7.462.500	Sirgas 2000	25m	Peridomicile	01170130
79	2019	1	21	2019-01-21	00:25:12	Didelphis aurita	Big-eared opossum	1	B13	663.5	7.462.500	Sirgas 2000	25m	Peridomicile	01210132
80	2019	1	26	2019-01-26	20:21:09	Didelphis aurita	Big-eared opossum	1	B13	663.5	7.462.500	Sirgas 2000	25m	Peridomicile	01260146
81	2019	1	31	2019-01-31	04:53:51	Didelphis aurita	Big-eared opossum	1	B13	663.5	7.462.500	Sirgas 2000	25m	Peridomicile	01310156
82	2019	2	4	2019-02-04	09:08:48	Felis catus	Domestic cat	1	B13	663.5	7.462.500	Sirgas 2000	25m	Peridomicile	02040165
83	2019	2	8	2019-02-08	05:20:07	Didelphis aurita	Big-eared opossum	1	B13	663.5	7.462.500	Sirgas 2000	25m	Peridomicile	02080169
84	2019	2	10	2019-02-10	11:07:32	Canis familiaris	Domestic dog	1	B13	663.5	7.462.500	Sirgas 2000	25m	Peridomicile	02100175
85	2019	2	11	2019-02-11	22:33:38	Procyon cancrivorus	Crab-eating raccoon	1	B13	663.5	7.462.500	Sirgas 2000	25m	Peridomicile	02110177
86	2019	2	16	2019-02-16	15:04:08	Canis familiaris	Domestic dog	2	B13	663.5	7.462.500	Sirgas 2000	25m	Peridomicile	02160002
87	2019	2	28	2019-02-28	14:43:56	Canis familiaris	Domestic dog	1	B13	663.5	7.462.500	Sirgas 2000	25m	Peridomicile	02280018
88	2019	3	7	2019-03-07	21:05:14	Procyon cancrivorus	Crab-eating raccoon	1	B13	663.5	7.462.500	Sirgas 2000	25m	Peridomicile	03070026
89	2019	3	8	2019-03-08	02:21:44	Procyon cancrivorus	Crab-eating raccoon	1	B13	663.5	7.462.500	Sirgas 2000	25m	Peridomicile	03080031
90	2019	3	8	2019-03-08	04:31:50	Canis familiaris	Domestic dog	2	B13	663.5	7.462.500	Sirgas 2000	25m	Peridomicile	03080037
91	2019	3	10	2019-03-10	10:01:12	Canis familiaris	Domestic dog	1	B13	663.5	7.462.500	Sirgas 2000	25m	Peridomicile	03100041
92	2019	3	10	2019-03-10	23:35:33	Procyon cancrivorus	Crab-eating raccoon	1	B13	663.5	7.462.500	Sirgas 2000	25m	Peridomicile	03100064
93	2019	3	13	2019-03-13	02:20:26	Procyon cancrivorus	Crab-eating raccoon	1	B13	663.5	7.462.500	Sirgas 2000	25m	Peridomicile	03130084
94	2019	3	14	2019-03-14	09:26:45	Canis familiaris	Domestic dog	1	B13	663.5	7.462.500	Sirgas 2000	25m	Peridomicile	03140094
95	2019	3	17	2019-03-17	21:06:34	Cuniculus paca	Lowland paca	1	B13	663.5	7.462.500	Sirgas 2000	25m	Peridomicile	03170097
96	2019	3	17	2019-03-17	23:33:33	Cerdocyon thous	Crab-eating fox	1	B13	663.5	7.462.500	Sirgas 2000	25m	Peridomicile	03170100
97	2019	3	18	2019-03-18	18:49:58	Cuniculus paca	Lowland paca	1	B13	663.5	7.462.500	Sirgas 2000	25m	Peridomicile	03180103
98	2019	3	19	2019-03-19	23:03:08	Cuniculus paca	Lowland paca	1	B13	663.5	7.462.500	Sirgas 2000	25m	Peridomicile	03190111
99	2019	3	29	2019-03-29	07:38:15	Canis familiaris	Domestic dog	1	B13	663.5	7.462.500	Sirgas 2000	25m	Peridomicile	03290141
100	2019	3	30	2019-03-30	23:07:05	Didelphis aurita	Big-eared opossum	1	B13	663.5	7.462.500	Sirgas 2000	25m	Peridomicile	03300145
101	2019	4	6	2019-04-06	00:27:46	Cuniculus paca	Lowland paca	1	B13	663.5	7.462.500	Sirgas 2000	25m	Peridomicile	04060157
102	2019	4	6	2019-04-06	03:56:28	Cuniculus paca	Lowland paca	1	B13	663.5	7.462.500	Sirgas 2000	25m	Peridomicile	04060185
103	2019	4	9	2019-04-09	03:54:59	Sylvilagus tapetillus	Coastal tapeti	1	B13	663.5	7.462.500	Sirgas 2000	25m	Peridomicile	04090210
104	2019	4	11	2019-04-11	18:47:42	Cuniculus paca	Lowland paca	1	B13	663.5	7.462.500	Sirgas 2000	25m	Peridomicile	04110221
105	2019	4	13	2019-04-13	05:04:58	Didelphis aurita	Big-eared opossum	1	B13	663.5	7.462.500	Sirgas 2000	25m	Peridomicile	04130228
106	2019	4	14	2019-04-14	01:34:49	Didelphis aurita	Big-eared opossum	1	B13	663.5	7.462.500	Sirgas 2000	25m	Peridomicile	04140232
107	2019	4	16	2019-04-16	05:36:01	Didelphis aurita	Big-eared opossum	1	B13	663.5	7.462.500	Sirgas 2000	25m	Peridomicile	04160234
108	2019	4	19	2019-04-19	23:15:25	Didelphis aurita	Big-eared opossum	1	B13	663.5	7.462.500	Sirgas 2000	25m	Peridomicile	04190244
109	2019	4	22	2019-04-22	20:17:04	Cuniculus paca	Lowland paca	1	B13	663.5	7.462.500	Sirgas 2000	25m	Peridomicile	04220253
110	2019	5	3	2019-05-03	22:56:00	Cuniculus paca	Lowland paca	1	B13	663.5	7.462.500	Sirgas 2000	25m	Peridomicile	05030262
111	2019	5	4	2019-05-04	00:38:58	Dasypus novemcinctus	Nine-banded armadillo	1	B13	663.5	7.462.500	Sirgas 2000	25m	Peridomicile	05040286
112	2019	5	5	2019-05-05	18:26:22	Cuniculus paca	Lowland paca	1	B13	663.5	7.462.500	Sirgas 2000	25m	Peridomicile	05050297
113	2019	5	6	2019-05-06	04:04:15	Didelphis aurita	Big-eared opossum	1	B13	663.5	7.462.500	Sirgas 2000	25m	Peridomicile	05060300
114	2019	5	6	2019-05-06	22:04:35	Cuniculus paca	Lowland paca	1	B13	663.5	7.462.500	Sirgas 2000	25m	Peridomicile	05060304
115	2019	5	7	2019-05-07	00:51:36	Cuniculus paca	Lowland paca	1	B13	663.5	7.462.500	Sirgas 2000	25m	Peridomicile	05070330
116	2019	5	8	2019-05-08	01:06:52	Cuniculus paca	Lowland paca	1	B13	663.5	7.462.500	Sirgas 2000	25m	Peridomicile	05080341
117	2019	5	8	2019-05-08	13:19:03	Canis familiaris	Domestic dog	1	B13	663.5	7.462.500	Sirgas 2000	25m	Peridomicile	05080344
118	2019	5	9	2019-05-09	21:30:49	Cuniculus paca	Lowland paca	1	B13	663.5	7.462.500	Sirgas 2000	25m	Peridomicile	05090347
119	2019	5	10	2019-05-10	01:05:44	Cuniculus paca	Lowland paca	1	B13	663.5	7.462.500	Sirgas 2000	25m	Peridomicile	05100364
121	2019	5	12	2019-05-12	00:25:58	Cuniculus paca	Lowland paca	1	B13	663.5	7.462.500	Sirgas 2000	25m	Peridomicile	05120413
120	2019	5	12	2019-05-12	18:27:08	Cuniculus paca	Lowland paca	1	B13	663.5	7.462.500	Sirgas 2000	25m	Peridomicile	05120420
122	2019	5	13	2019-05-13	23:35:01	Sylvilagus tapetillus	Coastal tapeti	1	B13	663.5	7.462.500	Sirgas 2000	25m	Peridomicile	05130425
123	2019	5	15	2019-05-15	01:11:55	Cuniculus paca	Lowland paca	1	B13	663.5	7.462.500	Sirgas 2000	25m	Peridomicile	05150432
124	2019	5	15	2019-05-15	18:48:07	Cuniculus paca	Lowland paca	1	B13	663.5	7.462.500	Sirgas 2000	25m	Peridomicile	05150440
125	2019	5	16	2019-05-16	02:13:17	Cuniculus paca	Lowland paca	1	B13	663.5	7.462.500	Sirgas 2000	25m	Peridomicile	05160446
126	2019	5	16	2019-05-16	18:12:38	Cuniculus paca	Lowland paca	1	B13	663.5	7.462.500	Sirgas 2000	25m	Peridomicile	05160453
127	2019	5	17	2019-05-17	00:20:22	Cuniculus paca	Lowland paca	1	B13	663.5	7.462.500	Sirgas 2000	25m	Peridomicile	05170457
128	2019	5	17	2019-05-17	03:22:39	Cuniculus paca	Lowland paca	1	B13	663.5	7.462.500	Sirgas 2000	25m	Peridomicile	05170459
131	2019	5	18	2019-05-18	02:42:23	Cuniculus paca	Lowland paca	1	B13	663.5	7.462.500	Sirgas 2000	25m	Peridomicile	05180478
132	2019	5	19	2019-05-19	01:39:20	Cuniculus paca	Lowland paca	1	B13	663.5	7.462.500	Sirgas 2000	25m	Peridomicile	05190497
133	2019	5	20	2019-05-20	00:09:01	Cuniculus paca	Lowland paca	1	B13	663.5	7.462.500	Sirgas 2000	25m	Peridomicile	05200502
134	2019	5	20	2019-05-20	05:47:56	Felis catus	Domestic cat	1	B13	663.5	7.462.500	Sirgas 2000	25m	Peridomicile	05200508
135	2019	5	20	2019-05-20	20:39:26	Didelphis aurita	Big-eared opossum	1	B13	663.5	7.462.500	Sirgas 2000	25m	Peridomicile	05200223
136	2019	5	21	2019-05-21	18:06:36	Cuniculus paca	Lowland paca	1	B13	663.5	7.462.500	Sirgas 2000	25m	Peridomicile	05210529
137	2019	5	22	2019-05-22	23:01:06	Cuniculus paca	Lowland paca	1	B13	663.5	7.462.500	Sirgas 2000	25m	Peridomicile	05220186
138	2019	5	23	2019-05-23	01:40:17	Cuniculus paca	Lowland paca	1	B13	663.5	7.462.500	Sirgas 2000	25m	Peridomicile	05230205
139	2019	5	24	2019-05-24	18:00:22	Cuniculus paca	Lowland paca	1	B13	663.5	7.462.500	Sirgas 2000	25m	Peridomicile	05240214
140	2019	5	24	2019-05-24	19:54:35	Cuniculus paca	Lowland paca	1	B13	663.5	7.462.500	Sirgas 2000	25m	Peridomicile	05240227
141	2019	5	25	2019-05-25	01:13:11	Felis catus	Domestic cat	1	B13	663.5	7.462.500	Sirgas 2000	25m	Peridomicile	05250229
142	2019	5	25	2019-05-25	01:32:25	Didelphis aurita	Big-eared opossum	1	B13	663.5	7.462.500	Sirgas 2000	25m	Peridomicile	05250233
143	2019	5	25	2019-05-25	03:05:01	Cuniculus paca	Lowland paca	1	B13	663.5	7.462.500	Sirgas 2000	25m	Peridomicile	05250235
144	2019	5	25	2019-05-25	19:08:45	Cuniculus paca	Lowland paca	1	B13	663.5	7.462.500	Sirgas 2000	25m	Peridomicile	05250238
145	2019	5	26	2019-05-26	02:51:04	Cuniculus paca	Lowland paca	1	B13	663.5	7.462.500	Sirgas 2000	25m	Peridomicile	05260289
146	2019	5	26	2019-05-26	18:26:26	Cuniculus paca	Lowland paca	1	B13	663.5	7.462.500	Sirgas 2000	25m	Peridomicile	05260318
147	2019	5	27	2019-05-27	00:16:01	Felis catus	Domestic cat	1	B13	663.5	7.462.500	Sirgas 2000	25m	Peridomicile	05270366
148	2019	5	27	2019-05-27	18:14:28	Cuniculus paca	Lowland paca	1	B13	663.5	7.462.500	Sirgas 2000	25m	Peridomicile	05270375
149	2019	5	27	2019-05-27	23:15:31	Didelphis aurita	Big-eared opossum	1	B13	663.5	7.462.500	Sirgas 2000	25m	Peridomicile	05270380
150	2019	5	28	2019-05-28	18:10:14	Cuniculus paca	Lowland paca	1	B13	663.5	7.462.500	Sirgas 2000	25m	Peridomicile	05280390
151	2019	5	28	2019-05-28	22:07:04	Cuniculus paca	Lowland paca	1	B13	663.5	7.462.500	Sirgas 2000	25m	Peridomicile	05280405
152	2019	5	30	2019-05-30	03:12:53	Cuniculus paca	Lowland paca	1	B13	663.5	7.462.500	Sirgas 2000	25m	Peridomicile	05300408
153	2019	5	30	2019-05-30	18:21:31	Cuniculus paca	Lowland paca	1	B13	663.5	7.462.500	Sirgas 2000	25m	Peridomicile	05300415
154	2019	5	31	2019-05-31	18:45:45	Cuniculus paca	Lowland paca	1	B13	663.5	7.462.500	Sirgas 2000	25m	Peridomicile	05310426
155	2019	6	4	2019-06-04	18:19:37	Cuniculus paca	Lowland paca	1	B13	663.5	7.462.500	Sirgas 2000	25m	Peridomicile	06040435
156	2019	6	6	2019-06-06	01:21:27	Cuniculus paca	Lowland paca	1	B13	663.5	7.462.500	Sirgas 2000	25m	Peridomicile	06060439
157	2019	6	6	2019-06-06	18:41:42	Cuniculus paca	Lowland paca	1	B13	663.5	7.462.500	Sirgas 2000	25m	Peridomicile	06060445
158	2019	6	7	2019-06-07	02:25:37	Cuniculus paca	Lowland paca	1	B13	663.5	7.462.500	Sirgas 2000	25m	Peridomicile	06070452
159	2019	6	10	2019-06-10	04:11:52	Cuniculus paca	Lowland paca	1	B13	663.5	7.462.500	Sirgas 2000	25m	Peridomicile	06100466
160	2019	6	11	2019-06-11	04:00:54	Cuniculus paca	Lowland paca	1	B13	663.5	7.462.500	Sirgas 2000	25m	Peridomicile	06110472
161	2019	6	11	2019-06-11	18:17:07	Cuniculus paca	Lowland paca	1	B13	663.5	7.462.500	Sirgas 2000	25m	Peridomicile	06110480
162	2019	6	12	2019-06-12	19:13:13	Cuniculus paca	Lowland paca	1	B13	663.5	7.462.500	Sirgas 2000	25m	Peridomicile	06120485
163	2019	6	13	2019-06-13	22:41:46	Didelphis aurita	Big-eared opossum	1	B13	663.5	7.462.500	Sirgas 2000	25m	Peridomicile	06130490
164	2019	6	15	2019-06-15	04:48:55	Cuniculus paca	Lowland paca	1	B13	663.5	7.462.500	Sirgas 2000	25m	Peridomicile	06150492
165	2019	6	19	2019-06-19	07:27:12	Canis familiaris	Domestic dog	1	B13	663.5	7.462.500	Sirgas 2000	25m	Peridomicile	06190500
166	2019	6	21	2019-06-21	19:17:06	Didelphis aurita	Big-eared opossum	1	B13	663.5	7.462.500	Sirgas 2000	25m	Peridomicile	06210503
167	2019	6	22	2019-06-22	18:26:51	Cuniculus paca	Lowland paca	1	B13	663.5	7.462.500	Sirgas 2000	25m	Peridomicile	06220518
168	2019	6	25	2019-06-25	18:14:05	Cuniculus paca	Lowland paca	1	B13	663.5	7.462.500	Sirgas 2000	25m	Peridomicile	06250527
169	2019	6	26	2019-06-26	03:19:09	Cuniculus paca	Lowland paca	1	B13	663.5	7.462.500	Sirgas 2000	25m	Peridomicile	06260534
170	2019	6	28	2019-06-28	21:44:55	Didelphis aurita	Big-eared opossum	1	B13	663.5	7.462.500	Sirgas 2000	25m	Peridomicile	06280538
171	2019	7	7	2019-07-07	18:14:05	Cuniculus paca	Lowland paca	1	B13	663.5	7.462.500	Sirgas 2000	25m	Peridomicile	07070554
172	2019	7	8	2019-07-08	18:17:22	Cuniculus paca	Lowland paca	1	B13	663.5	7.462.500	Sirgas 2000	25m	Peridomicile	07080559
173	2019	7	9	2019-07-09	18:22:32	Cuniculus paca	Lowland paca	1	B13	663.5	7.462.500	Sirgas 2000	25m	Peridomicile	07090564
174	2019	12	10	2019-12-10	19:12:57	Cuniculus paca	Lowland paca	1	B13	663.5	7.462.500	Sirgas 2000	25m	Peridomicile	05100398
175	2019	12	26	2019-12-26	10:16:42	Canis familiaris	Domestic dog	1	B13	663.5	7.462.500	Sirgas 2000	25m	Peridomicile	12260119
176	2018	11	30	2018-11-30	23:17:45	Didelphis aurita	Big-eared opossum	1	B14	663.75	7.462.500	Sirgas 2000	25m	Peridomicile	11300029
177	2018	12	1	2018-12-01	09:48:04	Felis catus	Domestic cat	1	B14	663.75	7.462.500	Sirgas 2000	25m	Peridomicile	12010037
178	2018	12	2	2018-12-02	21:51:44	Didelphis aurita	Big-eared opossum	1	B14	663.75	7.462.500	Sirgas 2000	25m	Peridomicile	12020045
179	2018	12	5	2018-12-05	04:34:56	Didelphis aurita	Big-eared opossum	1	B14	663.75	7.462.500	Sirgas 2000	25m	Peridomicile	12050053
180	2018	12	8	2018-12-08	23:28:50	Cerdocyon thous	Crab-eating fox	2	B14	663.75	7.462.500	Sirgas 2000	25m	Peridomicile	12080093
181	2018	12	13	2018-12-13	00:42:03	Didelphis aurita	Big-eared opossum	1	B14	663.75	7.462.500	Sirgas 2000	25m	Peridomicile	12130100
182	2018	12	13	2018-12-13	04:19:05	Didelphis aurita	Big-eared opossum	1	B14	663.75	7.462.500	Sirgas 2000	25m	Peridomicile	12130107
184	2018	12	14	2018-12-14	04:46:43	Didelphis aurita	Big-eared opossum	1	B14	663.75	7.462.500	Sirgas 2000	25m	Peridomicile	12240232
183	2018	12	14	2018-12-14	21:57:26	Didelphis aurita	Big-eared opossum	1	B14	663.75	7.462.500	Sirgas 2000	25m	Peridomicile	12140120
185	2018	12	16	2018-12-16	04:07:31	Didelphis aurita	Big-eared opossum	1	B14	663.75	7.462.500	Sirgas 2000	25m	Peridomicile	12160128
186	2018	12	17	2018-12-17	01:09:41	Didelphis aurita	Big-eared opossum	1	B14	663.75	7.462.500	Sirgas 2000	25m	Peridomicile	12170141
187	2018	12	17	2018-12-17	05:35:57	Didelphis aurita	Big-eared opossum	1	B14	663.75	7.462.500	Sirgas 2000	25m	Peridomicile	12170144
189	2018	12	19	2018-12-19	02:31:45	Didelphis aurita	Big-eared opossum	1	B14	663.75	7.462.500	Sirgas 2000	25m	Peridomicile	12190156
188	2018	12	19	2018-12-19	22:43:32	Didelphis aurita	Big-eared opossum	1	B14	663.75	7.462.500	Sirgas 2000	25m	Peridomicile	12190159
190	2018	12	20	2018-12-20	00:56:49	Didelphis aurita	Big-eared opossum	1	B14	663.75	7.462.500	Sirgas 2000	25m	Peridomicile	12200163
191	2018	12	21	2018-12-21	03:33:56	Didelphis aurita	Big-eared opossum	1	B14	663.75	7.462.500	Sirgas 2000	25m	Peridomicile	12210172
192	2018	12	21	2018-12-21	20:24:26	Didelphis aurita	Big-eared opossum	1	B14	663.75	7.462.500	Sirgas 2000	25m	Peridomicile	12210180
193	2018	12	22	2018-12-22	04:34:40	Didelphis aurita	Big-eared opossum	1	B14	663.75	7.462.500	Sirgas 2000	25m	Peridomicile	12220192
194	2018	12	22	2018-12-22	21:12:55	Didelphis aurita	Big-eared opossum	1	B14	663.75	7.462.500	Sirgas 2000	25m	Peridomicile	12220295
195	2018	12	23	2018-12-23	01:46:21	Didelphis aurita	Big-eared opossum	1	B14	663.75	7.462.500	Sirgas 2000	25m	Peridomicile	12230204
196	2018	12	23	2018-12-23	03:15:43	Didelphis aurita	Big-eared opossum	1	B14	663.75	7.462.500	Sirgas 2000	25m	Peridomicile	12230225
197	2018	12	23	2018-12-23	17:42:44	Canis familiaris	Domestic dog	1	B14	663.75	7.462.500	Sirgas 2000	25m	Peridomicile	12230229
198	2018	12	24	2018-12-24	04:46:42	Didelphis aurita	Big-eared opossum	1	B14	663.75	7.462.500	Sirgas 2000	25m	Peridomicile	12240231
199	2018	12	26	2018-12-26	01:43:41	Tamandua tetradactyla	Southern tamandua	1	B14	663.75	7.462.500	Sirgas 2000	25m	Peridomicile	12260236
200	2018	12	27	2018-12-27	07:39:12	Canis familiaris	Domestic dog	1	B14	663.75	7.462.500	Sirgas 2000	25m	Peridomicile	12270242
201	2018	12	29	2018-12-29	01:05:40	Canis familiaris	Domestic dog	1	B14	663.75	7.462.500	Sirgas 2000	25m	Peridomicile	12290243
202	2018	12	29	2018-12-29	18:54:21	Canis familiaris	Domestic dog	1	B14	663.75	7.462.500	Sirgas 2000	25m	Peridomicile	12290254
203	2018	12	31	2018-12-31	04:03:33	Didelphis aurita	Big-eared opossum	1	B14	663.75	7.462.500	Sirgas 2000	25m	Peridomicile	12310260
204	2019	1	2	2019-01-02	21:03:48	Didelphis aurita	Big-eared opossum	1	B14	663.75	7.462.500	Sirgas 2000	25m	Peridomicile	1020284
206	2019	1	3	2019-01-03	04:45:04	Didelphis aurita	Big-eared opossum	1	B14	663.75	7.462.500	Sirgas 2000	25m	Peridomicile	1030297
205	2019	1	3	2019-01-03	20:30:31	Didelphis aurita	Big-eared opossum	1	B14	663.75	7.462.500	Sirgas 2000	25m	Peridomicile	1030309
208	2019	1	7	2019-01-07	23:08:11	Didelphis aurita	Big-eared opossum	1	B14	663.75	7.462.500	Sirgas 2000	25m	Peridomicile	1070327
207	2019	1	7	2019-01-07	21:32:28	Didelphis aurita	Big-eared opossum	1	B14	663.75	7.462.500	Sirgas 2000	25m	Peridomicile	1070323
209	2019	1	8	2019-01-08	04:39:17	Didelphis aurita	Big-eared opossum	1	B14	663.75	7.462.500	Sirgas 2000	25m	Peridomicile	1080334
210	2019	1	9	2019-01-09	22:15:33	Didelphis aurita	Big-eared opossum	1	B14	663.75	7.462.500	Sirgas 2000	25m	Peridomicile	1090360
212	2019	1	10	2019-01-10	00:15:39	Didelphis aurita	Big-eared opossum	1	B14	663.75	7.462.500	Sirgas 2000	25m	Peridomicile	1100376
211	2019	1	10	2019-01-10	03:02:28	Didelphis aurita	Big-eared opossum	1	B14	663.75	7.462.500	Sirgas 2000	25m	Peridomicile	1100380
213	2019	1	11	2019-01-11	04:11:23	Didelphis aurita	Big-eared opossum	1	B14	663.75	7.462.500	Sirgas 2000	25m	Peridomicile	1110393
214	2019	1	11	2019-01-11	05:19:21	Didelphis aurita	Big-eared opossum	1	B14	663.75	7.462.500	Sirgas 2000	25m	Peridomicile	1110405
215	2019	1	14	2019-01-14	21:42:32	Didelphis aurita	Big-eared opossum	1	B14	663.75	7.462.500	Sirgas 2000	25m	Peridomicile	1140410
216	2019	1	16	2019-01-16	05:44:46	Didelphis aurita	Big-eared opossum	1	B14	663.75	7.462.500	Sirgas 2000	25m	Peridomicile	1160411
217	2019	1	17	2019-01-17	02:15:41	Cerdocyon thous	Crab-eating fox	2	B14	663.75	7.462.500	Sirgas 2000	25m	Peridomicile	1170415
218	2019	1	17	2019-01-17	05:09:44	Didelphis aurita	Big-eared opossum	1	B14	663.75	7.462.500	Sirgas 2000	25m	Peridomicile	1170421
219	2019	1	17	2019-01-17	07:02:33	Canis familiaris	Domestic dog	2	B14	663.75	7.462.500	Sirgas 2000	25m	Peridomicile	1170424
220	2019	1	18	2019-01-18	05:01:40	Cerdocyon thous	Crab-eating fox	1	B14	663.75	7.462.500	Sirgas 2000	25m	Peridomicile	1180434
221	2019	1	18	2019-01-18	18:56:35	Felis catus	Domestic cat	1	B14	663.75	7.462.500	Sirgas 2000	25m	Peridomicile	1180441
222	2019	1	20	2019-01-20	03:21:52	Didelphis aurita	Big-eared opossum	1	B14	663.75	7.462.500	Sirgas 2000	25m	Peridomicile	1200443
223	2019	2	23	2019-02-23	12:36:33	Canis familiaris	Domestic dog	2	B14	663.75	7.462.500	Sirgas 2000	25m	Peridomicile	22020001
224	2019	2	25	2019-02-25	01:24:28	Cerdocyon thous	Crab-eating fox	1	B14	663.75	7.462.500	Sirgas 2000	25m	Peridomicile	2250014
225	2019	3	4	2019-03-04	15:10:47	Canis familiaris	Domestic dog	1	B14	663.75	7.462.500	Sirgas 2000	25m	Peridomicile	3040033
226	2019	3	4	2019-03-04	16:11:17	Canis familiaris	Domestic dog	2	B14	663.75	7.462.500	Sirgas 2000	25m	Peridomicile	3040037
227	2019	3	5	2019-03-05	01:02:11	Canis familiaris	Domestic dog	1	B14	663.75	7.462.500	Sirgas 2000	25m	Peridomicile	3050054
228	2019	3	5	2019-03-05	03:18:16	Canis familiaris	Domestic dog	1	B14	663.75	7.462.500	Sirgas 2000	25m	Peridomicile	3050063
229	2019	3	7	2019-03-07	16:54:15	Canis familiaris	Domestic dog	1	B14	663.75	7.462.500	Sirgas 2000	25m	Peridomicile	3070070
230	2019	3	9	2019-03-09	15:06:17	Canis familiaris	Domestic dog	2	B14	663.75	7.462.500	Sirgas 2000	25m	Peridomicile	3090077
231	2019	3	10	2019-03-10	07:50:05	Canis familiaris	Domestic dog	2	B14	663.75	7.462.500	Sirgas 2000	25m	Peridomicile	3100086
232	2019	3	11	2019-03-11	19:27:41	Canis familiaris	Domestic dog	1	B14	663.75	7.462.500	Sirgas 2000	25m	Peridomicile	3110093
233	2019	3	14	2019-03-14	10:48:52	Canis familiaris	Domestic dog	2	B14	663.75	7.462.500	Sirgas 2000	25m	Peridomicile	3140098
234	2019	3	15	2019-03-15	14:55:18	Canis familiaris	Domestic dog	1	B14	663.75	7.462.500	Sirgas 2000	25m	Peridomicile	3150101
235	2019	3	16	2019-03-16	13:42:31	Canis familiaris	Domestic dog	1	B14	663.75	7.462.500	Sirgas 2000	25m	Peridomicile	3160111
236	2019	3	19	2019-03-19	06:03:11	Canis familiaris	Domestic dog	1	B14	663.75	7.462.500	Sirgas 2000	25m	Peridomicile	3190113
237	2019	3	22	2019-03-22	07:27:41	Canis familiaris	Domestic dog	1	B14	663.75	7.462.500	Sirgas 2000	25m	Peridomicile	3220117
238	2019	3	25	2019-03-25	16:00:51	Canis familiaris	Domestic dog	1	B14	663.75	7.462.500	Sirgas 2000	25m	Peridomicile	3250145
239	2019	3	26	2019-03-26	07:32:34	Canis familiaris	Domestic dog	1	B14	663.75	7.462.500	Sirgas 2000	25m	Peridomicile	3260149
240	2019	3	29	2019-03-29	08:32:16	Canis familiaris	Domestic dog	2	B14	663.75	7.462.500	Sirgas 2000	25m	Peridomicile	3290170
241	2019	3	30	2019-03-30	16:52:57	Canis familiaris	Domestic dog	1	B14	663.75	7.462.500	Sirgas 2000	25m	Peridomicile	3300191
242	2019	4	4	2019-04-04	13:20:20	Canis familiaris	Domestic dog	1	B14	663.75	7.462.500	Sirgas 2000	25m	Peridomicile	4040199
243	2019	4	7	2019-04-07	07:53:47	Canis familiaris	Domestic dog	3	B14	663.75	7.462.500	Sirgas 2000	25m	Peridomicile	4070202
244	2019	4	8	2019-04-08	08:55:19	Canis familiaris	Domestic dog	1	B14	663.75	7.462.500	Sirgas 2000	25m	Peridomicile	4080221
245	2019	4	11	2019-04-11	15:20:28	Canis familiaris	Domestic dog	2	B14	663.75	7.462.500	Sirgas 2000	25m	Peridomicile	4110233
246	2019	4	12	2019-04-12	15:40:24	Canis familiaris	Domestic dog	1	B14	663.75	7.462.500	Sirgas 2000	25m	Peridomicile	4120242
247	2019	4	22	2019-04-22	01:25:43	Cerdocyon thous	Crab-eating fox	1	B14	663.75	7.462.500	Sirgas 2000	25m	Peridomicile	4220270
248	2019	5	15	2019-05-15	08:27:22	Canis familiaris	Domestic dog	1	B14	663.75	7.462.500	Sirgas 2000	25m	Peridomicile	5150277
249	2019	5	20	2019-05-20	03:01:54	Canis familiaris	Domestic dog	1	B14	663.75	7.462.500	Sirgas 2000	25m	Peridomicile	5200291
250	2019	5	22	2019-05-22	21:29:53	Canis familiaris	Domestic dog	3	B14	663.75	7.462.500	Sirgas 2000	25m	Peridomicile	5220302
251	2019	5	26	2019-05-26	16:58:00	Canis familiaris	Domestic dog	1	B14	663.75	7.462.500	Sirgas 2000	25m	Peridomicile	5260309
252	2019	5	31	2019-05-31	06:36:10	Canis familiaris	Domestic dog	1	B14	663.75	7.462.500	Sirgas 2000	25m	Peridomicile	5310318
253	2019	6	5	2019-06-05	03:29:23	Canis familiaris	Domestic dog	1	B14	663.75	7.462.500	Sirgas 2000	25m	Peridomicile	6050326
254	2019	6	5	2019-06-05	09:26:13	Canis familiaris	Domestic dog	1	B14	663.75	7.462.500	Sirgas 2000	25m	Peridomicile	6050329
255	2019	6	6	2019-06-06	06:50:56	Procyon cancrivorus	Crab-eating raccoon	1	B14	663.75	7.462.500	Sirgas 2000	25m	Peridomicile	6060333
256	2019	6	7	2019-06-07	02:45:50	Canis familiaris	Domestic dog	1	B14	663.75	7.462.500	Sirgas 2000	25m	Peridomicile	6070337
257	2019	6	26	2019-06-26	07:18:15	Canis familiaris	Domestic dog	1	B14	663.75	7.462.500	Sirgas 2000	25m	Peridomicile	6260366
259	2019	-	-	2019	00:00:00	Didelphis aurita	Big-eared opossum	1	B15	664	7.462.500	Sirgas 2000	25m	Peridomicile	1010075
260	2019	-	-	2019	00:00:00	Didelphis aurita	Big-eared opossum	1	B15	664	7.462.500	Sirgas 2000	25m	Peridomicile	1010083
262	2019	-	-	2019	00:00:00	Felis catus	Domestic cat	1	B15	664	7.462.500	Sirgas 2000	25m	Peridomicile	1010103
264	2019	-	-	2019	00:00:00	Canis familiaris	Domestic dog	1	B15	664	7.462.500	Sirgas 2000	25m	Peridomicile	1010199
268	2019	-	-	2019	00:00:00	Dasyprocta leporina	Red-rumped agouti	1	B15	664	7.462.500	Sirgas 2000	25m	Peridomicile	1010399
270	2019	-	-	2019	00:00:00	Didelphis aurita	Big-eared opossum	1	B15	664	7.462.500	Sirgas 2000	25m	Peridomicile	1010543
273	2019	-	-	2019	00:00:00	Didelphis aurita	Big-eared opossum	1	B15	664	7.462.500	Sirgas 2000	25m	Peridomicile	1010843
275	2019	-	-	2019	00:00:00	Didelphis aurita	Big-eared opossum	1	B15	664	7.462.500	Sirgas 2000	25m	Peridomicile	1010875
272	2019	-	-	2019	00:00:17	Didelphis aurita	Big-eared opossum	1	B15	664	7.462.500	Sirgas 2000	25m	Peridomicile	1010627
266	2019	-	-	2019	00:00:28	Dasypus novemcinctus	Nine-banded armadillo	1	B15	664	7.462.500	Sirgas 2000	25m	Peridomicile	1010323
261	2019	-	-	2019	00:23:53	Tamandua tetradactyla	Southern tamandua	1	B15	664	7.462.500	Sirgas 2000	25m	Peridomicile	1010087
269	2019	1	1	2019-01-01	02:27:30	Tamandua tetradactyla	Southern tamandua	1	B15	664	7.462.500	Sirgas 2000	25m	Peridomicile	1010495
265	2019	1	1	2019-01-01	02:47:20	Didelphis aurita	Big-eared opossum	1	B15	664	7.462.500	Sirgas 2000	25m	Peridomicile	1010303
267	2019	1	1	2019-01-01	03:49:04	Didelphis aurita	Big-eared opossum	1	B15	664	7.462.500	Sirgas 2000	25m	Peridomicile	1010335
271	2019	1	1	2019-01-01	06:40:02	Didelphis aurita	Big-eared opossum	1	B15	664	7.462.500	Sirgas 2000	25m	Peridomicile	1010591
263	2019	1	1	2019-01-01	20:39:09	Didelphis aurita	Big-eared opossum	1	B15	664	7.462.500	Sirgas 2000	25m	Peridomicile	1010183
274	2019	1	1	2019-01-01	23:24:08	Didelphis aurita	Big-eared opossum	1	B15	664	7.462.500	Sirgas 2000	25m	Peridomicile	1010851
277	2019	1	2	2019-01-02	04:24:11	Didelphis aurita	Big-eared opossum	1	B15	664	7.462.500	Sirgas 2000	25m	Peridomicile	1020243
258	2019	1	2	2019-01-02	07:07:56	Didelphis aurita	Big-eared opossum	1	B15	664	7.462.500	Sirgas 2000	25m	Peridomicile	100691
276	2019	1	2	2019-01-02	11:17:18	Didelphis aurita	Big-eared opossum	1	B15	664	7.462.500	Sirgas 2000	25m	Peridomicile	1020139
278	2019	1	2	2019-01-02	12:41:09	Canis familiaris	Domestic dog	1	B15	664	7.462.500	Sirgas 2000	25m	Peridomicile	1020823
279	2019	1	3	2019-01-03	12:41:09	Didelphis aurita	Big-eared opossum	1	B15	664	7.462.500	Sirgas 2000	25m	Peridomicile	1030099
280	2019	1	4	2019-01-04	02:48:42	Didelphis aurita	Big-eared opossum	1	B15	664	7.462.500	Sirgas 2000	25m	Peridomicile	1040099
281	2019	1	5	2019-01-05	04:29:49	Didelphis aurita	Big-eared opossum	1	B15	664	7.462.500	Sirgas 2000	25m	Peridomicile	1050103
282	2019	1	5	2019-01-05	18:24:24	Canis familiaris	Domestic dog	1	B15	664	7.462.500	Sirgas 2000	25m	Peridomicile	1050370
283	2019	1	6	2019-01-06	03:34:24	Didelphis aurita	Big-eared opossum	1	B15	664	7.462.500	Sirgas 2000	25m	Peridomicile	1060059
284	2019	1	7	2019-01-07	03:55:07	Didelphis aurita	Big-eared opossum	1	B15	664	7.462.500	Sirgas 2000	25m	Peridomicile	1070071
285	2019	1	7	2019-01-07	08:19:38	Tamandua tetradactyla	Southern tamandua	1	B15	664	7.462.500	Sirgas 2000	25m	Peridomicile	1070075
286	2019	1	7	2019-01-07	16:06:56	Canis familiaris	Domestic dog	2	B15	664	7.462.500	Sirgas 2000	25m	Peridomicile	1070417
287	2019	1	8	2019-01-08	17:19:32	Canis familiaris	Domestic dog	2	B15	664	7.462.500	Sirgas 2000	25m	Peridomicile	1080077
288	2019	1	13	2019-01-13	13:15:05	Didelphis aurita	Big-eared opossum	1	B15	664	7.462.500	Sirgas 2000	25m	Peridomicile	1130147
289	2019	1	15	2019-01-15	15:50:50	Canis familiaris	Domestic dog	1	B15	664	7.462.500	Sirgas 2000	25m	Peridomicile	1150157
290	2019	1	17	2019-01-17	07:47:00	Cerdocyon thous	Crab-eating fox	1	B15	664	7.462.500	Sirgas 2000	25m	Peridomicile	1170171
291	2019	1	17	2019-01-17	10:11:51	Didelphis aurita	Big-eared opossum	1	B15	664	7.462.500	Sirgas 2000	25m	Peridomicile	1170175
292	2019	1	19	2019-01-19	05:34:46	Didelphis aurita	Big-eared opossum	1	B15	664	7.462.500	Sirgas 2000	25m	Peridomicile	1190179
293	2019	1	21	2019-01-21	11:59:28	Didelphis aurita	Big-eared opossum	1	B15	664	7.462.500	Sirgas 2000	25m	Peridomicile	1210187
294	2018	6	30	2018-06-30	02:08:52	Didelphis aurita	Big-eared opossum	2	C12	663.25	7.462.250	Sirgas 2000	30m	Transitional Forest	6300907
295	2018	7	1	2018-07-01	01:44:15	Didelphis aurita	Big-eared opossum	1	C12	663.25	7.462.250	Sirgas 2000	30m	Transitional Forest	7010421
296	2018	7	2	2018-07-02	21:48:21	Didelphis aurita	Big-eared opossum	1	C12	663.25	7.462.250	Sirgas 2000	30m	Transitional Forest	7020049
297	2018	7	4	2018-07-04	02:37:31	Didelphis aurita	Big-eared opossum	1	C12	663.25	7.462.250	Sirgas 2000	30m	Transitional Forest	7040341
298	2018	7	12	2018-07-12	02:14:13	Didelphis aurita	Big-eared opossum	1	C12	663.25	7.462.250	Sirgas 2000	30m	Transitional Forest	7120383
299	2018	10	24	2018-10-24	02:17:32	Cerdocyon thous	Crab-eating fox	1	C13	663.5	7.462.250	Sirgas 2000	20m	Peridomicile	12240055
300	2018	10	24	2018-10-24	03:20:49	Cerdocyon thous	Crab-eating fox	1	C13	663.5	7.462.250	Sirgas 2000	20m	Peridomicile	12240076
301	2018	10	25	2018-10-25	20:52:54	Cerdocyon thous	Crab-eating fox	2	C13	663.5	7.462.250	Sirgas 2000	20m	Peridomicile	10250044
302	2018	11	29	2018-11-29	03:55:30	Canis familiaris	Domestic dog	4	C13	663.5	7.462.250	Sirgas 2000	20m	Peridomicile	11290058
303	2018	12	3	2018-12-03	02:38:05	Cerdocyon thous	Crab-eating fox	2	C13	663.5	7.462.250	Sirgas 2000	20m	Peridomicile	12030067
304	2018	12	5	2018-12-05	22:26:17	Cerdocyon thous	Crab-eating fox	2	C13	663.5	7.462.250	Sirgas 2000	20m	Peridomicile	12050079
305	2018	12	9	2018-12-09	00:24:29	Cerdocyon thous	Crab-eating fox	1	C13	663.5	7.462.250	Sirgas 2000	20m	Peridomicile	12090109
306	2018	12	11	2018-12-11	22:14:01	Cerdocyon thous	Crab-eating fox	1	C13	663.5	7.462.250	Sirgas 2000	20m	Peridomicile	12110114
307	2018	12	12	2018-12-12	02:23:22	Cerdocyon thous	Crab-eating fox	2	C13	663.5	7.462.250	Sirgas 2000	20m	Peridomicile	12120121
308	2018	12	19	2018-12-19	00:55:35	Canis familiaris	Domestic dog	1	C13	663.5	7.462.250	Sirgas 2000	20m	Peridomicile	12190055
309	2018	12	24	2018-12-24	21:22:46	Cerdocyon thous	Crab-eating fox	1	C13	663.5	7.462.250	Sirgas 2000	20m	Peridomicile	1240158
310	2018	12	27	2018-12-27	19:30:26	Felis catus	Domestic cat	1	C13	663.5	7.462.250	Sirgas 2000	20m	Peridomicile	12270179
311	2018	12	28	2018-12-28	21:37:27	Cerdocyon thous	Crab-eating fox	2	C13	663.5	7.462.250	Sirgas 2000	20m	Peridomicile	12280195
312	2019	1	3	2019-01-03	00:02:10	Tamandua tetradactyla	Southern tamandua	1	C13	663.5	7.462.250	Sirgas 2000	20m	Peridomicile	1030242
313	2019	1	4	2019-01-04	20:28:30	Felis catus	Domestic cat	1	C13	663.5	7.462.250	Sirgas 2000	20m	Peridomicile	1040246
314	2019	1	4	2019-01-04	21:49:52	Cerdocyon thous	Crab-eating fox	2	C13	663.5	7.462.250	Sirgas 2000	20m	Peridomicile	1040255
315	2018	11	13	2018-11-13	12:20:25	Canis familiaris	Domestic dog	3	C14	663.75	7.462.250	Sirgas 2000	20m	Peridomicile	11130124
316	2018	11	23	2018-11-23	00:59:32	Cuniculus paca	Lowland paca	1	C14	663.75	7.462.250	Sirgas 2000	20m	Peridomicile	11230211
317	2018	11	24	2018-11-24	20:43:53	Cuniculus paca	Lowland paca	1	C14	663.75	7.462.250	Sirgas 2000	20m	Peridomicile	11240216
318	2018	11	25	2018-11-25	20:31:52	Cuniculus paca	Lowland paca	1	C14	663.75	7.462.250	Sirgas 2000	20m	Peridomicile	11250220
319	2018	11	27	2018-11-27	00:16:01	Procyon cancrivorus	Crab-eating raccoon	1	C14	663.75	7.462.250	Sirgas 2000	20m	Peridomicile	11270223
320	2018	12	12	2018-12-12	15:27:40	Canis familiaris	Domestic dog	1	C14	663.75	7.462.250	Sirgas 2000	20m	Peridomicile	12120227
321	2018	12	24	2018-12-24	02:19:07	Canis familiaris	Domestic dog	2	C14	663.75	7.462.250	Sirgas 2000	20m	Peridomicile	12240237
322	2018	12	27	2018-12-27	10:49:38	Canis familiaris	Domestic dog	2	C14	663.75	7.462.250	Sirgas 2000	20m	Peridomicile	12270243
323	2019	1	13	2019-01-13	13:51:22	Canis familiaris	Domestic dog	3	C14	663.75	7.462.250	Sirgas 2000	20m	Peridomicile	01130312
324	2019	1	15	2019-01-15	04:03:53	Canis familiaris	Domestic dog	2	C14	663.75	7.462.250	Sirgas 2000	20m	Peridomicile	01150323
325	2019	1	23	2019-01-23	11:33:33	Canis familiaris	Domestic dog	2	C14	663.75	7.462.250	Sirgas 2000	20m	Peridomicile	01230356
328	2019	2	2	2019-02-02	16:38:07	Canis familiaris	Domestic dog	1	C14	663.75	7.462.250	Sirgas 2000	20m	Peridomicile	02020383
329	2019	2	3	2019-02-03	23:35:51	Felis catus	Domestic cat	1	C14	663.75	7.462.250	Sirgas 2000	20m	Peridomicile	02030389
330	2019	2	6	2019-02-06	00:21:18	Felis catus	Domestic cat	1	C14	663.75	7.462.250	Sirgas 2000	20m	Peridomicile	02060395
331	2019	2	7	2019-02-07	02:31:15	Felis catus	Domestic cat	1	C14	663.75	7.462.250	Sirgas 2000	20m	Peridomicile	02070408
332	2019	2	10	2019-02-10	10:59:26	Canis familiaris	Domestic dog	1	C14	663.75	7.462.250	Sirgas 2000	20m	Peridomicile	02100660
333	2019	3	21	2019-03-21	01:35:56	Canis familiaris	Domestic dog	1	C14	663.75	7.462.250	Sirgas 2000	20m	Peridomicile	03210013
334	2019	3	23	2019-03-23	00:06:17	Procyon cancrivorus	Crab-eating raccoon	1	C14	663.75	7.462.250	Sirgas 2000	20m	Peridomicile	03230018
335	2019	3	23	2019-03-23	19:32:44	Canis familiaris	Domestic dog	1	C14	663.75	7.462.250	Sirgas 2000	20m	Peridomicile	03230021
336	2019	3	26	2019-03-26	12:40:01	Canis familiaris	Domestic dog	3	C14	663.75	7.462.250	Sirgas 2000	20m	Peridomicile	03260038
337	2019	4	9	2019-04-09	06:22:48	Didelphis aurita	Big-eared opossum	1	C14	663.75	7.462.250	Sirgas 2000	20m	Peridomicile	04090077
338	2019	4	13	2019-04-13	04:49:09	Didelphis aurita	Big-eared opossum	1	C14	663.75	7.462.250	Sirgas 2000	20m	Peridomicile	04130089
339	2018	6	29	2018-06-29	21:33:19	Didelphis aurita	Big-eared opossum	1	D10	662.75	7.462.000	Sirgas 2000	55m	Transitional Forest	6290005
340	2018	6	30	2018-06-30	01:11:31	Didelphis aurita	Big-eared opossum	1	D10	662.75	7.462.000	Sirgas 2000	55m	Transitional Forest	6300158
341	2018	7	1	2018-07-01	01:40:12	Didelphis aurita	Big-eared opossum	1	D10	662.75	7.462.000	Sirgas 2000	55m	Transitional Forest	6010181
342	2018	7	2	2018-07-02	01:25:59	Didelphis aurita	Big-eared opossum	1	D10	662.75	7.462.000	Sirgas 2000	55m	Transitional Forest	7020186
343	2018	7	5	2018-07-05	20:12:54	Didelphis aurita	Big-eared opossum	1	D10	662.75	7.462.000	Sirgas 2000	55m	Transitional Forest	7050191
344	2018	7	6	2018-07-06	06:56:24	Dasyprocta leporina	Red-rumped agouti	1	D10	662.75	7.462.000	Sirgas 2000	55m	Transitional Forest	7060193
347	2019	1	18	2019-01-18	10:31:59	Canis familiaris	Domestic dog	1	D11	663	7.462.000	Sirgas 2000	20m	Transitional Forest	01180007
348	2019	1	22	2019-01-22	18:06:54	Canis familiaris	Domestic dog	1	D11	663	7.462.000	Sirgas 2000	20m	Transitional Forest	01220109
349	2019	1	27	2019-01-27	02:12:12	Procyon cancrivorus	Crab-eating raccoon	1	D11	663	7.462.000	Sirgas 2000	20m	Transitional Forest	01270015
350	2019	1	30	2019-01-30	01:55:25	Didelphis aurita	Big-eared opossum	1	D11	663	7.462.000	Sirgas 2000	20m	Transitional Forest	01300023
351	2019	2	2	2019-02-02	19:30:27	Dasyprocta leporina	Red-rumped agouti	1	D11	663	7.462.000	Sirgas 2000	20m	Transitional Forest	02020035
352	2019	2	8	2019-02-08	07:03:54	Leopardus guttulus	Southern little spotted cat	1	D11	663	7.462.000	Sirgas 2000	20m	Transitional Forest	02080046
353	2019	2	11	2019-02-11	06:25:11	Procyon cancrivorus	Crab-eating raccoon	1	D11	663	7.462.000	Sirgas 2000	20m	Transitional Forest	02110059
354	2019	2	12	2019-02-12	23:31:58	Cerdocyon thous	Crab-eating fox	1	D11	663	7.462.000	Sirgas 2000	20m	Transitional Forest	02120063
355	2019	2	15	2019-02-15	23:23:00	Cerdocyon thous	Crab-eating fox	1	D11	663	7.462.000	Sirgas 2000	20m	Transitional Forest	02150075
356	2019	2	17	2019-02-17	12:33:40	Dasyprocta leporina	Red-rumped agouti	1	D11	663	7.462.000	Sirgas 2000	20m	Transitional Forest	02170083
357	2019	2	18	2019-02-18	14:21:31	Dasyprocta leporina	Red-rumped agouti	1	D11	663	7.462.000	Sirgas 2000	20m	Transitional Forest	02180085
358	2019	2	19	2019-02-19	12:13:37	Dasyprocta leporina	Red-rumped agouti	1	D11	663	7.462.000	Sirgas 2000	20m	Transitional Forest	02190093
359	2019	2	20	2019-02-20	11:11:44	Canis familiaris	Domestic dog	1	D11	663	7.462.000	Sirgas 2000	20m	Transitional Forest	02200101
360	2019	2	20	2019-02-20	19:14:20	Canis familiaris	Domestic dog	1	D11	663	7.462.000	Sirgas 2000	20m	Transitional Forest	02200109
361	2019	2	21	2019-02-21	06:38:06	Cerdocyon thous	Crab-eating fox	1	D11	663	7.462.000	Sirgas 2000	20m	Transitional Forest	02210115
362	2019	2	22	2019-02-22	07:38:21	Dasyprocta leporina	Red-rumped agouti	1	D11	663	7.462.000	Sirgas 2000	20m	Transitional Forest	2220123
363	2019	2	22	2019-02-22	13:30:08	Dasyprocta leporina	Red-rumped agouti	1	D11	663	7.462.000	Sirgas 2000	20m	Transitional Forest	02220127
364	2019	2	26	2019-02-26	09:30:13	Dasyprocta leporina	Red-rumped agouti	1	D11	663	7.462.000	Sirgas 2000	20m	Transitional Forest	02260141
365	2019	3	3	2019-03-03	09:45:41	Dasyprocta leporina	Red-rumped agouti	1	D11	663	7.462.000	Sirgas 2000	20m	Transitional Forest	03030155
366	2019	3	13	2019-03-13	05:59:37	Didelphis aurita	Big-eared opossum	1	D11	663	7.462.000	Sirgas 2000	20m	Transitional Forest	03130187
367	2019	3	14	2019-03-14	09:19:44	Dasyprocta leporina	Red-rumped agouti	2	D11	663	7.462.000	Sirgas 2000	20m	Transitional Forest	3140203
368	2019	3	14	2019-03-14	11:25:08	Dasyprocta leporina	Red-rumped agouti	2	D11	663	7.462.000	Sirgas 2000	20m	Transitional Forest	03140241
369	2019	3	16	2019-03-16	09:09:43	Dasyprocta leporina	Red-rumped agouti	1	D11	663	7.462.000	Sirgas 2000	20m	Transitional Forest	03160251
370	2019	3	18	2019-03-18	07:50:34	Dasyprocta leporina	Red-rumped agouti	1	D11	663	7.462.000	Sirgas 2000	20m	Transitional Forest	03180255
371	2019	3	18	2019-03-18	20:34:44	Procyon cancrivorus	Crab-eating raccoon	1	D11	663	7.462.000	Sirgas 2000	20m	Transitional Forest	03180263
372	2019	3	19	2019-03-19	02:05:44	Procyon cancrivorus	Crab-eating raccoon	1	D11	663	7.462.000	Sirgas 2000	20m	Transitional Forest	03190267
373	2019	3	19	2019-03-19	22:58:15	Cerdocyon thous	Crab-eating fox	1	D11	663	7.462.000	Sirgas 2000	20m	Transitional Forest	03190283
374	2019	3	22	2019-03-22	06:37:55	Cerdocyon thous	Crab-eating fox	1	D11	663	7.462.000	Sirgas 2000	20m	Transitional Forest	03220299
375	2019	3	22	2019-03-22	14:59:11	Cerdocyon thous	Crab-eating fox	1	D11	663	7.462.000	Sirgas 2000	20m	Transitional Forest	3230319
376	2019	3	23	2019-03-23	09:15:52	Dasyprocta leporina	Red-rumped agouti	1	D11	663	7.462.000	Sirgas 2000	20m	Transitional Forest	03230321
377	2019	3	28	2019-03-28	04:18:10	Procyon cancrivorus	Crab-eating raccoon	1	D11	663	7.462.000	Sirgas 2000	20m	Transitional Forest	03280327
378	2019	3	28	2019-03-28	07:31:50	Dasyprocta leporina	Red-rumped agouti	1	D11	663	7.462.000	Sirgas 2000	20m	Transitional Forest	03280329
379	2019	3	28	2019-03-28	08:34:33	Dasyprocta leporina	Red-rumped agouti	1	D11	663	7.462.000	Sirgas 2000	20m	Transitional Forest	3280342
380	2019	4	13	2019-04-13	08:27:06	Dasyprocta leporina	Red-rumped agouti	1	D11	663	7.462.000	Sirgas 2000	20m	Transitional Forest	04130009
381	2019	4	13	2019-04-13	09:52:46	Dasyprocta leporina	Red-rumped agouti	1	D11	663	7.462.000	Sirgas 2000	20m	Transitional Forest	4130015
382	2019	4	14	2019-04-14	09:25:07	Dasyprocta leporina	Red-rumped agouti	1	D11	663	7.462.000	Sirgas 2000	20m	Transitional Forest	04140039
383	2019	4	16	2019-04-16	02:58:09	Procyon cancrivorus	Crab-eating raccoon	1	D11	663	7.462.000	Sirgas 2000	20m	Transitional Forest	04160059
384	2019	4	17	2019-04-17	09:42:34	Dasyprocta leporina	Red-rumped agouti	1	D11	663	7.462.000	Sirgas 2000	20m	Transitional Forest	04170077
385	2019	4	18	2019-04-18	07:40:50	Dasyprocta leporina	Red-rumped agouti	1	D11	663	7.462.000	Sirgas 2000	20m	Transitional Forest	04180081
386	2019	4	19	2019-04-19	08:45:32	Dasyprocta leporina	Red-rumped agouti	1	D11	663	7.462.000	Sirgas 2000	20m	Transitional Forest	4190086
387	2019	4	19	2019-04-19	10:02:20	Dasyprocta leporina	Red-rumped agouti	1	D11	663	7.462.000	Sirgas 2000	20m	Transitional Forest	4200107
388	2019	4	20	2019-04-20	07:37:55	Dasyprocta leporina	Red-rumped agouti	1	D11	663	7.462.000	Sirgas 2000	20m	Transitional Forest	04200111
389	2019	4	20	2019-04-20	09:31:31	Cerdocyon thous	Crab-eating fox	1	D11	663	7.462.000	Sirgas 2000	20m	Transitional Forest	04200114
390	2019	4	22	2019-04-22	10:32:38	Dasyprocta leporina	Red-rumped agouti	1	D11	663	7.462.000	Sirgas 2000	20m	Transitional Forest	04220122
391	2019	4	26	2019-04-26	08:57:05	Dasyprocta leporina	Red-rumped agouti	2	D11	663	7.462.000	Sirgas 2000	20m	Transitional Forest	04260138
392	2019	5	5	2019-05-05	18:17:33	Canis familiaris	Domestic dog	1	D11	663	7.462.000	Sirgas 2000	20m	Transitional Forest	05050149
393	2019	5	12	2019-05-12	03:04:34	Didelphis aurita	Big-eared opossum	1	D11	663	7.462.000	Sirgas 2000	20m	Transitional Forest	05120167
394	2019	5	12	2019-05-12	09:11:25	Dasyprocta leporina	Red-rumped agouti	1	D11	663	7.462.000	Sirgas 2000	20m	Transitional Forest	05120171
395	2019	5	18	2019-05-18	11:16:13	Dasyprocta leporina	Red-rumped agouti	1	D11	663	7.462.000	Sirgas 2000	20m	Transitional Forest	05180175
396	2019	5	19	2019-05-19	17:01:36	Leopardus guttulus	Southern little spotted cat	1	D11	663	7.462.000	Sirgas 2000	20m	Transitional Forest	05190179
397	2019	5	21	2019-05-21	07:45:09	Dasyprocta leporina	Red-rumped agouti	1	D11	663	7.462.000	Sirgas 2000	20m	Transitional Forest	05210181
398	2019	5	22	2019-05-22	07:35:19	Canis familiaris	Domestic dog	1	D11	663	7.462.000	Sirgas 2000	20m	Transitional Forest	05220187
399	2019	5	24	2019-05-24	09:12:11	Dasyprocta leporina	Red-rumped agouti	1	D11	663	7.462.000	Sirgas 2000	20m	Transitional Forest	05240202
400	2019	5	25	2019-05-25	09:42:33	Dasyprocta leporina	Red-rumped agouti	1	D11	663	7.462.000	Sirgas 2000	20m	Transitional Forest	05250214
401	2019	5	26	2019-05-26	09:17:19	Leopardus guttulus	Southern little spotted cat	1	D11	663	7.462.000	Sirgas 2000	20m	Transitional Forest	05260222
402	2019	5	26	2019-05-26	22:09:25	Didelphis aurita	Big-eared opossum	1	D11	663	7.462.000	Sirgas 2000	20m	Transitional Forest	05260227
403	2019	5	28	2019-05-28	23:20:34	Didelphis aurita	Big-eared opossum	1	D11	663	7.462.000	Sirgas 2000	20m	Transitional Forest	05280235
404	2019	5	29	2019-05-29	09:35:33	Dasyprocta leporina	Red-rumped agouti	1	D11	663	7.462.000	Sirgas 2000	20m	Transitional Forest	05290242
405	2019	6	1	2019-06-01	22:42:43	Didelphis aurita	Big-eared opossum	1	D11	663	7.462.000	Sirgas 2000	20m	Transitional Forest	06710275
406	2019	6	2	2019-06-02	07:35:00	Dasyprocta leporina	Red-rumped agouti	1	D11	663	7.462.000	Sirgas 2000	20m	Transitional Forest	06020277
407	2019	6	3	2019-06-03	00:10:48	Didelphis aurita	Big-eared opossum	1	D11	663	7.462.000	Sirgas 2000	20m	Transitional Forest	06030283
408	2019	6	3	2019-06-03	17:44:11	Dasyprocta leporina	Red-rumped agouti	1	D11	663	7.462.000	Sirgas 2000	20m	Transitional Forest	06030291
409	2019	6	4	2019-06-04	19:07:09	Didelphis aurita	Big-eared opossum	1	D11	663	7.462.000	Sirgas 2000	20m	Transitional Forest	06040295
410	2019	6	5	2019-06-05	00:13:21	Didelphis aurita	Big-eared opossum	1	D11	663	7.462.000	Sirgas 2000	20m	Transitional Forest	06050299
411	2019	6	8	2019-06-08	00:14:31	Cuniculus paca	Lowland paca	1	D11	663	7.462.000	Sirgas 2000	20m	Transitional Forest	06080303
412	2019	6	8	2019-06-08	18:07:05	Dasyprocta leporina	Red-rumped agouti	1	D11	663	7.462.000	Sirgas 2000	20m	Transitional Forest	06080317
413	2019	6	13	2019-06-13	09:30:35	Dasyprocta leporina	Red-rumped agouti	1	D11	663	7.462.000	Sirgas 2000	20m	Transitional Forest	06130329
414	2019	6	15	2019-06-15	08:30:58	Dasyprocta leporina	Red-rumped agouti	1	D11	663	7.462.000	Sirgas 2000	20m	Transitional Forest	06150334
415	2019	6	18	2019-06-18	19:08:01	Didelphis aurita	Big-eared opossum	1	D11	663	7.462.000	Sirgas 2000	20m	Transitional Forest	06180347
416	2019	6	19	2019-06-19	04:48:39	Didelphis aurita	Big-eared opossum	1	D11	663	7.462.000	Sirgas 2000	20m	Transitional Forest	06190351
417	2019	6	22	2019-06-22	09:20:43	Dasyprocta leporina	Red-rumped agouti	1	D11	663	7.462.000	Sirgas 2000	20m	Transitional Forest	06220359
418	2019	6	14	2019-06-24	07:30:43	Tamandua tetradactyla	Southern tamandua	1	D11	663	7.462.000	Sirgas 2000	20m	Transitional Forest	06240379
419	2019	6	29	2019-06-29	21:27:13	Cuniculus paca	Lowland paca	1	D11	663	7.462.000	Sirgas 2000	20m	Transitional Forest	6290066
420	2019	6	30	2019-06-30	01:31:52	Didelphis aurita	Big-eared opossum	1	D11	663	7.462.000	Sirgas 2000	20m	Transitional Forest	6300090
421	2019	6	30	2019-06-30	02:36:45	Didelphis aurita	Big-eared opossum	1	D11	663	7.462.000	Sirgas 2000	20m	Transitional Forest	6300093
422	2019	6	30	2019-06-30	20:56:25	Didelphis aurita	Big-eared opossum	1	D11	663	7.462.000	Sirgas 2000	20m	Transitional Forest	6300096
423	2019	6	30	2019-06-30	22:05:01	Didelphis aurita	Big-eared opossum	1	D11	663	7.462.000	Sirgas 2000	20m	Transitional Forest	6300098
424	2019	7	1	2019-07-01	00:09:39	Didelphis aurita	Big-eared opossum	1	D11	663	7.462.000	Sirgas 2000	20m	Transitional Forest	7010102
425	2019	7	1	2019-07-01	20:11:21	Cuniculus paca	Lowland paca	1	D11	663	7.462.000	Sirgas 2000	20m	Transitional Forest	7010103
427	2019	7	2	2019-07-02	05:59:47	Canis familiaris	Domestic dog	2	D11	663	7.462.000	Sirgas 2000	20m	Transitional Forest	7020107
426	2019	7	2	2019-07-02	19:37:47	Didelphis aurita	Big-eared opossum	1	D11	663	7.462.000	Sirgas 2000	20m	Transitional Forest	7020447
428	2019	7	3	2019-07-03	01:57:39	Didelphis aurita	Big-eared opossum	1	D11	663	7.462.000	Sirgas 2000	20m	Transitional Forest	7140116
429	2019	7	14	2019-07-14	03:20:31	Didelphis aurita	Big-eared opossum	1	D11	663	7.462.000	Sirgas 2000	20m	Transitional Forest	7140119
430	2019	7	15	2019-07-15	23:41:49	Didelphis aurita	Big-eared opossum	1	D11	663	7.462.000	Sirgas 2000	20m	Transitional Forest	7150120
1009	2020	1	25	2020-01-25	22:28:53	Didelphis aurita	Big-eared opossum	1	D11	663	7.462.000	Sirgas 2000	20m	Transitional Forest	1250227
1010	2020	2	27	2020-01-27	01:04:32	Dasypus novemcinctus	Nine-banded armadillo	1	D11	663	7.462.000	Sirgas 2000	20m	Transitional Forest	1270229
1011	2020	2	2	2020-02-02	01:29:29	Didelphis aurita	Big-eared opossum	1	D11	663	7.462.000	Sirgas 2000	20m	Transitional Forest	2020237
1012	2020	2	2	2020-02-02	04:13:17	Didelphis aurita	Big-eared opossum	1	D11	663	7.462.000	Sirgas 2000	20m	Transitional Forest	2020241
1013	2020	2	2	2020-02-02	22:57:18	Dasypus novemcinctus	Nine-banded armadillo	1	D11	663	7.462.000	Sirgas 2000	20m	Transitional Forest	2020245
1014	2020	2	3	2020-02-03	22:49:16	Didelphis aurita	Big-eared opossum	1	D11	663	7.462.000	Sirgas 2000	20m	Transitional Forest	2030249
1015	2020	2	13	2020-02-13	02:24:59	Cerdocyon thous	Crab-eating fox	1	D11	663	7.462.000	Sirgas 2000	20m	Transitional Forest	2130261
1016	2020	2	19	2020-02-19	02:36:06	Didelphis aurita	Big-eared opossum	1	D11	663	7.462.000	Sirgas 2000	20m	Transitional Forest	2190282
1017	2020	2	21	2020-02-21	02:19:26	Didelphis aurita	Big-eared opossum	1	D11	663	7.462.000	Sirgas 2000	20m	Transitional Forest	2210289
1018	2020	2	21	2020-02-21	20:01:39	Dasypus novemcinctus	Nine-banded armadillo	1	D11	663	7.462.000	Sirgas 2000	20m	Transitional Forest	210295
1019	2020	2	24	2020-02-24	07:32:56	Dasyprocta leporina	Red-rumped agouti	1	D11	663	7.462.000	Sirgas 2000	20m	Transitional Forest	2240297
1020	2020	2	26	2020-02-26	07:14:29	Dasyprocta leporina	Red-rumped agouti	1	D11	663	7.462.000	Sirgas 2000	20m	Transitional Forest	2260317
1021	2020	3	3	2020-03-03	02:51:53	Didelphis aurita	Big-eared opossum	1	D11	663	7.462.000	Sirgas 2000	20m	Transitional Forest	3030341
1022	2020	3	3	2020-03-03	10:22:03	Dasyprocta leporina	Red-rumped agouti	1	D11	663	7.462.000	Sirgas 2000	20m	Transitional Forest	3030345
1023	2020	3	3	2020-03-03	17:02:08	Dasyprocta leporina	Red-rumped agouti	1	D11	663	7.462.000	Sirgas 2000	20m	Transitional Forest	3030353
1024	2020	3	13	2020-03-13	04:05:43	Didelphis aurita	Big-eared opossum	1	D11	663	7.462.000	Sirgas 2000	20m	Transitional Forest	3130378
1044	2020	3	15	2020-03-15	01:28:20	Didelphis aurita	Big-eared opossum	1	D11	663	7.462.000	Sirgas 2000	20m	Transitional Forest	4150553
1025	2020	3	15	2020-03-15	08:35:59	Canis familiaris	Domestic dog	1	D11	663	7.462.000	Sirgas 2000	20m	Transitional Forest	3150393
1026	2020	3	16	2020-03-16	03:19:46	Didelphis aurita	Big-eared opossum	1	D11	663	7.462.000	Sirgas 2000	20m	Transitional Forest	3160397
1027	2020	3	16	2020-03-16	21:27:40	Didelphis aurita	Big-eared opossum	1	D11	663	7.462.000	Sirgas 2000	20m	Transitional Forest	3160413
1028	2020	3	19	2020-03-19	04:05:01	Didelphis aurita	Big-eared opossum	1	D11	663	7.462.000	Sirgas 2000	20m	Transitional Forest	3190441
1029	2020	3	20	2020-03-20	08:33:38	Dasyprocta leporina	Red-rumped agouti	1	D11	663	7.462.000	Sirgas 2000	20m	Transitional Forest	3200445
1030	2020	3	21	2020-03-21	02:36:18	Didelphis aurita	Big-eared opossum	1	D11	663	7.462.000	Sirgas 2000	20m	Transitional Forest	3210451
1031	2020	3	22	2020-03-22	01:41:06	Didelphis aurita	Big-eared opossum	1	D11	663	7.462.000	Sirgas 2000	20m	Transitional Forest	3220453
1032	2020	3	24	2020-03-24	05:21:54	Cerdocyon thous	Crab-eating fox	1	D11	663	7.462.000	Sirgas 2000	20m	Transitional Forest	3240458
1033	2020	3	25	2020-03-25	19:36:13	Didelphis aurita	Big-eared opossum	1	D11	663	7.462.000	Sirgas 2000	20m	Transitional Forest	3250465
1034	2020	3	25	2020-03-25	22:54:50	Didelphis aurita	Big-eared opossum	1	D11	663	7.462.000	Sirgas 2000	20m	Transitional Forest	3250469
1035	2020	3	28	2020-03-28	04:34:56	Didelphis aurita	Big-eared opossum	1	D11	663	7.462.000	Sirgas 2000	20m	Transitional Forest	3280477
1037	2020	3	30	2020-03-30	08:29:12	Dasyprocta leporina	Red-rumped agouti	1	D11	663	7.462.000	Sirgas 2000	20m	Transitional Forest	3200489
1038	2020	3	30	2020-03-30	19:30:53	Procyon cancrivorus	Crab-eating raccoon	1	D11	663	7.462.000	Sirgas 2000	20m	Transitional Forest	3300493
1039	2020	3	31	2020-03-31	07:23:15	Dasyprocta leporina	Red-rumped agouti	1	D11	663	7.462.000	Sirgas 2000	20m	Transitional Forest	3310498
1040	2020	4	1	2020-04-01	10:48:56	Dasyprocta leporina	Red-rumped agouti	1	D11	663	7.462.000	Sirgas 2000	20m	Transitional Forest	4010502
1041	2020	4	11	2020-04-11	23:19:06	Didelphis aurita	Big-eared opossum	1	D11	663	7.462.000	Sirgas 2000	20m	Transitional Forest	4110517
1042	2020	4	13	2020-04-13	01:34:22	Didelphis aurita	Big-eared opossum	1	D11	663	7.462.000	Sirgas 2000	20m	Transitional Forest	4130537
1043	2020	4	13	2020-04-13	08:53:03	Dasyprocta leporina	Red-rumped agouti	1	D11	663	7.462.000	Sirgas 2000	20m	Transitional Forest	4130550
1045	2020	4	17	2020-04-17	05:00:12	Cerdocyon thous	Crab-eating fox	1	D11	663	7.462.000	Sirgas 2000	20m	Transitional Forest	4170558
1046	2020	4	19	2020-04-19	00:47:29	Didelphis aurita	Big-eared opossum	1	D11	663	7.462.000	Sirgas 2000	20m	Transitional Forest	4190561
1047	2020	4	28	2020-04-20	23:30:35	Didelphis aurita	Big-eared opossum	1	D11	663	7.462.000	Sirgas 2000	20m	Transitional Forest	4200569
1049	2020	4	21	2020-04-21	02:34:02	Didelphis aurita	Big-eared opossum	1	D11	663	7.462.000	Sirgas 2000	20m	Transitional Forest	4210581
1050	2020	4	2	2020-04-22	09:07:36	Dasyprocta leporina	Red-rumped agouti	1	D11	663	7.462.000	Sirgas 2000	20m	Transitional Forest	4220589
1051	2020	4	25	2020-04-25	02:24:49	Tamandua tetradactyla	Southern tamandua	1	D11	663	7.462.000	Sirgas 2000	20m	Transitional Forest	4250595
1052	2020	4	29	2020-04-29	02:19:41	Didelphis aurita	Big-eared opossum	1	D11	663	7.462.000	Sirgas 2000	20m	Transitional Forest	4290603
1053	2020	4	29	2020-04-29	23:48:03	Cuniculus paca	Lowland paca	1	D11	663	7.462.000	Sirgas 2000	20m	Transitional Forest	4290621
1054	2020	4	30	2020-04-30	03:11:34	Didelphis aurita	Big-eared opossum	1	D11	663	7.462.000	Sirgas 2000	20m	Transitional Forest	4300326
1055	2020	5	1	2020-05-01	02:13:46	Didelphis aurita	Big-eared opossum	1	D11	663	7.462.000	Sirgas 2000	20m	Transitional Forest	5020629
1056	2020	5	1	2020-05-01	03:38:43	Didelphis aurita	Big-eared opossum	1	D11	663	7.462.000	Sirgas 2000	20m	Transitional Forest	5010637
1057	2020	5	3	2020-05-03	09:18:29	Dasyprocta leporina	Red-rumped agouti	1	D11	663	7.462.000	Sirgas 2000	20m	Transitional Forest	5030641
1058	2020	5	6	2020-05-06	02:13:11	Didelphis aurita	Big-eared opossum	1	D11	663	7.462.000	Sirgas 2000	20m	Transitional Forest	5060645
1059	2020	5	7	2020-05-07	01:31:21	Didelphis aurita	Big-eared opossum	1	D11	663	7.462.000	Sirgas 2000	20m	Transitional Forest	5070649
1060	2020	5	9	2020-05-09	03:50:28	Didelphis aurita	Big-eared opossum	1	D11	663	7.462.000	Sirgas 2000	20m	Transitional Forest	5090670
1061	2020	5	11	2020-05-11	02:04:46	Didelphis aurita	Big-eared opossum	1	D11	663	7.462.000	Sirgas 2000	20m	Transitional Forest	5110673
1062	2020	5	14	2020-05-14	19:56:55	Didelphis aurita	Big-eared opossum	1	D11	663	7.462.000	Sirgas 2000	20m	Transitional Forest	5140685
431	2018	11	14	2018-11-14	22:54:32	Felis catus	Domestic cat	1	D13	663.5	7.462.000	Sirgas 2000	20m	Peridomicile	11140152
432	2018	11	15	2018-11-15	03:26:15	Cuniculus paca	Lowland paca	1	D13	663.5	7.462.000	Sirgas 2000	20m	Peridomicile	11150156
433	2018	11	19	2018-11-19	20:22:47	Cuniculus paca	Lowland paca	1	D13	663.5	7.462.000	Sirgas 2000	20m	Peridomicile	11910160
434	2018	11	22	2018-11-22	02:57:36	Cuniculus paca	Lowland paca	1	D13	663.5	7.462.000	Sirgas 2000	20m	Peridomicile	11220179
436	2018	11	23	2018-11-23	23:16:19	Cuniculus paca	Lowland paca	1	D13	663.5	7.462.000	Sirgas 2000	20m	Peridomicile	11230192
435	2018	11	23	2018-11-23	20:57:59	Cuniculus paca	Lowland paca	1	D13	663.5	7.462.000	Sirgas 2000	20m	Peridomicile	11230186
437	2018	11	27	2018-11-27	19:57:41	Didelphis aurita	Big-eared opossum	1	D13	663.5	7.462.000	Sirgas 2000	20m	Peridomicile	11270198
438	2018	11	29	2018-11-29	02:38:33	Cuniculus paca	Lowland paca	1	D13	663.5	7.462.000	Sirgas 2000	20m	Peridomicile	11290204
439	2018	11	29	2018-11-29	19:41:30	Didelphis aurita	Big-eared opossum	1	D13	663.5	7.462.000	Sirgas 2000	20m	Peridomicile	11290220
440	2018	12	2	2018-12-02	05:20:38	Didelphis aurita	Big-eared opossum	1	D13	663.5	7.462.000	Sirgas 2000	20m	Peridomicile	12020229
441	2018	12	3	2018-12-03	05:24:27	Didelphis aurita	Big-eared opossum	1	D13	663.5	7.462.000	Sirgas 2000	20m	Peridomicile	12030245
442	2018	12	3	2018-12-03	22:34:37	Didelphis aurita	Big-eared opossum	1	D13	663.5	7.462.000	Sirgas 2000	20m	Peridomicile	12030248
443	2018	12	4	2018-12-04	03:41:10	Cuniculus paca	Lowland paca	1	D13	663.5	7.462.000	Sirgas 2000	20m	Peridomicile	12040254
444	2018	12	4	2018-12-04	04:05:53	Didelphis aurita	Big-eared opossum	1	D13	663.5	7.462.000	Sirgas 2000	20m	Peridomicile	12040256
445	2018	12	5	2018-12-05	23:19:50	Didelphis aurita	Big-eared opossum	1	D13	663.5	7.462.000	Sirgas 2000	20m	Peridomicile	12050265
446	2018	12	7	2018-12-07	02:13:36	Cuniculus paca	Lowland paca	1	D13	663.5	7.462.000	Sirgas 2000	20m	Peridomicile	12070269
447	2018	12	8	2018-12-08	01:38:40	Cuniculus paca	Lowland paca	1	D13	663.5	7.462.000	Sirgas 2000	20m	Peridomicile	12080272
448	2018	12	8	2018-12-08	03:12:22	Cuniculus paca	Lowland paca	1	D13	663.5	7.462.000	Sirgas 2000	20m	Peridomicile	12080288
449	2018	12	9	2018-12-09	03:23:25	Cuniculus paca	Lowland paca	1	D13	663.5	7.462.000	Sirgas 2000	20m	Peridomicile	12090294
450	2018	12	10	2018-12-10	19:45:08	Felis catus	Domestic cat	1	D13	663.5	7.462.000	Sirgas 2000	20m	Peridomicile	12100300
451	2018	12	12	2018-12-12	04:56:03	Cuniculus paca	Lowland paca	1	D13	663.5	7.462.000	Sirgas 2000	20m	Peridomicile	12120305
452	2018	12	12	2018-12-12	20:20:03	Cuniculus paca	Lowland paca	1	D13	663.5	7.462.000	Sirgas 2000	20m	Peridomicile	12120308
453	2018	12	14	2018-12-14	05:09:22	Cuniculus paca	Lowland paca	1	D13	663.5	7.462.000	Sirgas 2000	20m	Peridomicile	12140318
454	2018	12	15	2018-12-15	04:49:21	Cuniculus paca	Lowland paca	1	D13	663.5	7.462.000	Sirgas 2000	20m	Peridomicile	12150322
455	2018	12	16	2018-12-16	20:28:35	Cuniculus paca	Lowland paca	1	D13	663.5	7.462.000	Sirgas 2000	20m	Peridomicile	12160324
456	2018	12	19	2018-12-19	02:22:23	Cuniculus paca	Lowland paca	1	D13	663.5	7.462.000	Sirgas 2000	20m	Peridomicile	12190330
457	2018	12	20	2018-12-20	00:00:21	Cuniculus paca	Lowland paca	1	D13	663.5	7.462.000	Sirgas 2000	20m	Peridomicile	12200335
458	2018	12	20	2018-12-20	05:15:34	Cuniculus paca	Lowland paca	1	D13	663.5	7.462.000	Sirgas 2000	20m	Peridomicile	12200340
459	2018	12	21	2018-12-21	02:49:53	Cuniculus paca	Lowland paca	1	D13	663.5	7.462.000	Sirgas 2000	20m	Peridomicile	12210347
460	2018	12	21	2018-12-21	23:34:21	Didelphis aurita	Big-eared opossum	1	D13	663.5	7.462.000	Sirgas 2000	20m	Peridomicile	12210348
461	2018	12	22	2018-12-22	20:18:13	Cuniculus paca	Lowland paca	1	D13	663.5	7.462.000	Sirgas 2000	20m	Peridomicile	12220355
462	2018	12	23	2018-12-23	02:54:03	Cuniculus paca	Lowland paca	1	D13	663.5	7.462.000	Sirgas 2000	20m	Peridomicile	12220360
463	2018	12	23	2018-12-23	05:07:05	Cuniculus paca	Lowland paca	1	D13	663.5	7.462.000	Sirgas 2000	20m	Peridomicile	12230366
464	2018	12	24	2018-12-24	03:36:43	Canis familiaris	Domestic dog	1	D13	663.5	7.462.000	Sirgas 2000	20m	Peridomicile	12240376
465	2018	12	24	2018-12-24	21:11:09	Cuniculus paca	Lowland paca	1	D13	663.5	7.462.000	Sirgas 2000	20m	Peridomicile	12240383
466	2018	12	25	2018-12-25	04:05:54	Cuniculus paca	Lowland paca	1	D13	663.5	7.462.000	Sirgas 2000	20m	Peridomicile	12250387
467	2018	12	26	2018-12-26	20:32:47	Cuniculus paca	Lowland paca	1	D13	663.5	7.462.000	Sirgas 2000	20m	Peridomicile	12260395
468	2018	12	27	2018-12-27	04:27:31	Cuniculus paca	Lowland paca	1	D13	663.5	7.462.000	Sirgas 2000	20m	Peridomicile	12270402
469	2018	12	27	2018-12-27	23:04:57	Cuniculus paca	Lowland paca	1	D13	663.5	7.462.000	Sirgas 2000	20m	Peridomicile	12270404
471	2018	12	28	2018-12-28	22:37:29	Cuniculus paca	Lowland paca	1	D13	663.5	7.462.000	Sirgas 2000	20m	Peridomicile	12280412
470	2018	12	28	2018-12-28	20:43:20	Cuniculus paca	Lowland paca	1	D13	663.5	7.462.000	Sirgas 2000	20m	Peridomicile	12280409
472	2018	12	29	2018-12-29	04:42:40	Cuniculus paca	Lowland paca	1	D13	663.5	7.462.000	Sirgas 2000	20m	Peridomicile	12280420
474	2018	12	29	2018-12-29	23:40:42	Cuniculus paca	Lowland paca	1	D13	663.5	7.462.000	Sirgas 2000	20m	Peridomicile	12290432
473	2018	12	29	2018-12-29	20:44:33	Cuniculus paca	Lowland paca	1	D13	663.5	7.462.000	Sirgas 2000	20m	Peridomicile	12290426
475	2018	12	30	2018-12-30	01:28:41	Cuniculus paca	Lowland paca	1	D13	663.5	7.462.000	Sirgas 2000	20m	Peridomicile	12300437
476	2018	12	30	2018-12-30	03:17:01	Cuniculus paca	Lowland paca	1	D13	663.5	7.462.000	Sirgas 2000	20m	Peridomicile	12300440
477	2018	12	31	2018-12-31	02:28:49	Cuniculus paca	Lowland paca	2	D13	663.5	7.462.000	Sirgas 2000	20m	Peridomicile	12310459
478	2018	12	31	2018-12-31	03:56:20	Didelphis aurita	Big-eared opossum	1	D13	663.5	7.462.000	Sirgas 2000	20m	Peridomicile	12310460
479	2019	1	1	2019-01-01	01:31:25	Cuniculus paca	Lowland paca	1	D13	663.5	7.462.000	Sirgas 2000	20m	Peridomicile	1010477
480	2019	1	2	2019-01-02	00:00:40	Cuniculus paca	Lowland paca	1	D13	663.5	7.462.000	Sirgas 2000	20m	Peridomicile	1010484
481	2019	1	2	2019-01-02	01:27:47	Cuniculus paca	Lowland paca	3	D13	663.5	7.462.000	Sirgas 2000	20m	Peridomicile	1020491
482	2019	1	2	2019-01-02	02:55:42	Cuniculus paca	Lowland paca	1	D13	663.5	7.462.000	Sirgas 2000	20m	Peridomicile	1020492
483	2019	1	3	2019-01-03	20:37:19	Cuniculus paca	Lowland paca	1	D13	663.5	7.462.000	Sirgas 2000	20m	Peridomicile	1030518
484	2019	1	4	2019-01-04	03:03:35	Cuniculus paca	Lowland paca	1	D13	663.5	7.462.000	Sirgas 2000	20m	Peridomicile	1040522
485	2019	1	4	2019-01-04	21:17:35	Cuniculus paca	Lowland paca	1	D13	663.5	7.462.000	Sirgas 2000	20m	Peridomicile	1040524
486	2019	1	5	2019-01-05	02:28:59	Cuniculus paca	Lowland paca	1	D13	663.5	7.462.000	Sirgas 2000	20m	Peridomicile	1050543
487	2019	1	6	2019-01-06	03:06:44	Cuniculus paca	Lowland paca	1	D13	663.5	7.462.000	Sirgas 2000	20m	Peridomicile	1060549
488	2019	1	6	2019-01-06	05:32:37	Canis familiaris	Domestic dog	2	D13	663.5	7.462.000	Sirgas 2000	20m	Peridomicile	1060553
489	2019	1	7	2019-01-07	01:05:59	Cuniculus paca	Lowland paca	1	D13	663.5	7.462.000	Sirgas 2000	20m	Peridomicile	1070563
490	2019	1	7	2019-01-07	01:17:03	Didelphis aurita	Big-eared opossum	1	D13	663.5	7.462.000	Sirgas 2000	20m	Peridomicile	1070570
491	2019	1	7	2019-01-07	04:11:40	Cuniculus paca	Lowland paca	1	D13	663.5	7.462.000	Sirgas 2000	20m	Peridomicile	1070572
492	2019	1	7	2019-01-07	23:41:56	Cuniculus paca	Lowland paca	1	D13	663.5	7.462.000	Sirgas 2000	20m	Peridomicile	1070576
493	2019	1	8	2019-01-08	03:03:24	Cuniculus paca	Lowland paca	1	D13	663.5	7.462.000	Sirgas 2000	20m	Peridomicile	1080583
496	2019	1	12	2019-01-12	03:10:12	Cuniculus paca	Lowland paca	1	D13	663.5	7.462.000	Sirgas 2000	20m	Peridomicile	1120606
498	2019	1	13	2019-01-13	04:00:51	Cuniculus paca	Lowland paca	1	D13	663.5	7.462.000	Sirgas 2000	20m	Peridomicile	1130614
499	2019	1	13	2019-01-13	23:30:19	Didelphis aurita	Big-eared opossum	1	D13	663.5	7.462.000	Sirgas 2000	20m	Peridomicile	1130615
500	2019	1	15	2019-01-15	03:49:58	Cuniculus paca	Lowland paca	1	D13	663.5	7.462.000	Sirgas 2000	20m	Peridomicile	1150627
502	2019	1	16	2019-01-16	04:20:42	Cuniculus paca	Lowland paca	1	D13	663.5	7.462.000	Sirgas 2000	20m	Peridomicile	1160635
501	2019	1	16	2019-01-16	20:19:13	Didelphis aurita	Big-eared opossum	1	D13	663.5	7.462.000	Sirgas 2000	20m	Peridomicile	1160640
504	2019	1	17	2019-01-17	01:21:13	Didelphis aurita	Big-eared opossum	1	D13	663.5	7.462.000	Sirgas 2000	20m	Peridomicile	1170645
503	2019	1	17	2019-01-17	03:07:18	Cuniculus paca	Lowland paca	1	D13	663.5	7.462.000	Sirgas 2000	20m	Peridomicile	1190647
505	2019	1	17	2019-01-17	23:59:13	Didelphis aurita	Big-eared opossum	1	D13	663.5	7.462.000	Sirgas 2000	20m	Peridomicile	1170651
506	2019	1	19	2019-01-19	04:12:59	Didelphis aurita	Big-eared opossum	1	D13	663.5	7.462.000	Sirgas 2000	20m	Peridomicile	1170655
507	2019	1	19	2019-01-19	22:24:57	Cuniculus paca	Lowland paca	1	D13	663.5	7.462.000	Sirgas 2000	20m	Peridomicile	1190659
508	2019	1	20	2019-01-20	04:04:58	Cuniculus paca	Lowland paca	1	D13	663.5	7.462.000	Sirgas 2000	20m	Peridomicile	1200663
509	2019	1	21	2019-01-21	04:31:15	Didelphis aurita	Big-eared opossum	1	D13	663.5	7.462.000	Sirgas 2000	20m	Peridomicile	1210667
510	2019	1	24	2019-01-24	03:29:01	Cuniculus paca	Lowland paca	1	D13	663.5	7.462.000	Sirgas 2000	20m	Peridomicile	1240672
511	2019	1	26	2019-01-26	05:57:31	Didelphis aurita	Big-eared opossum	1	D13	663.5	7.462.000	Sirgas 2000	20m	Peridomicile	1260675
512	2019	2	22	2019-02-22	23:11:43	Cuniculus paca	Lowland paca	1	D13	663.5	7.462.000	Sirgas 2000	20m	Peridomicile	02220017
513	2019	2	24	2019-02-24	11:50:56	Canis familiaris	Domestic dog	1	D13	663.5	7.462.000	Sirgas 2000	20m	Peridomicile	02240021
514	2019	2	24	2019-02-24	21:27:24	Cuniculus paca	Lowland paca	1	D13	663.5	7.462.000	Sirgas 2000	20m	Peridomicile	02240025
515	2019	2	25	2019-02-25	22:22:12	Cuniculus paca	Lowland paca	1	D13	663.5	7.462.000	Sirgas 2000	20m	Peridomicile	02250034
516	2019	2	27	2019-02-27	02:55:57	Didelphis aurita	Big-eared opossum	1	D13	663.5	7.462.000	Sirgas 2000	20m	Peridomicile	02270041
517	2019	2	27	2019-02-27	21:32:56	Cuniculus paca	Lowland paca	1	D13	663.5	7.462.000	Sirgas 2000	20m	Peridomicile	02270045
518	2019	2	28	2019-02-28	05:39:46	Cuniculus paca	Lowland paca	1	D13	663.5	7.462.000	Sirgas 2000	20m	Peridomicile	02270049
519	2019	2	28	2019-02-28	21:16:41	Cuniculus paca	Lowland paca	1	D13	663.5	7.462.000	Sirgas 2000	20m	Peridomicile	02280053
520	2019	3	1	2019-03-01	00:26:42	Cuniculus paca	Lowland paca	1	D13	663.5	7.462.000	Sirgas 2000	20m	Peridomicile	03010057
521	2019	3	2	2019-03-02	21:12:04	Didelphis aurita	Big-eared opossum	1	D13	663.5	7.462.000	Sirgas 2000	20m	Peridomicile	03020065
522	2019	3	3	2019-03-03	21:21:51	Cuniculus paca	Lowland paca	1	D13	663.5	7.462.000	Sirgas 2000	20m	Peridomicile	03030079
523	2019	3	7	2019-03-07	01:18:49	Cuniculus paca	Lowland paca	1	D13	663.5	7.462.000	Sirgas 2000	20m	Peridomicile	03070087
524	2019	3	7	2019-03-07	03:26:19	Cuniculus paca	Lowland paca	1	D13	663.5	7.462.000	Sirgas 2000	20m	Peridomicile	03070089
525	2019	3	7	2019-03-07	04:30:51	Cuniculus paca	Lowland paca	1	D13	663.5	7.462.000	Sirgas 2000	20m	Peridomicile	03070093
526	2019	3	9	2019-03-09	23:55:44	Cuniculus paca	Lowland paca	1	D13	663.5	7.462.000	Sirgas 2000	20m	Peridomicile	03090099
527	2019	3	10	2019-03-10	22:08:35	Cuniculus paca	Lowland paca	1	D13	663.5	7.462.000	Sirgas 2000	20m	Peridomicile	03100103
528	2019	3	11	2019-03-11	02:54:58	Cuniculus paca	Lowland paca	1	D13	663.5	7.462.000	Sirgas 2000	20m	Peridomicile	03110109
529	2019	3	11	2019-03-11	22:08:30	Cuniculus paca	Lowland paca	1	D13	663.5	7.462.000	Sirgas 2000	20m	Peridomicile	03110113
530	2019	3	12	2019-03-12	20:41:56	Cuniculus paca	Lowland paca	1	D13	663.5	7.462.000	Sirgas 2000	20m	Peridomicile	03110119
531	2019	3	12	2019-03-12	22:57:14	Cuniculus paca	Lowland paca	1	D13	663.5	7.462.000	Sirgas 2000	20m	Peridomicile	03120122
532	2019	3	13	2019-03-13	00:02:01	Felis catus	Domestic cat	1	D13	663.5	7.462.000	Sirgas 2000	20m	Peridomicile	03130131
533	2019	3	13	2019-03-13	02:09:40	Cuniculus paca	Lowland paca	1	D13	663.5	7.462.000	Sirgas 2000	20m	Peridomicile	03130135
534	2019	3	14	2019-03-14	02:03:03	Cuniculus paca	Lowland paca	1	D13	663.5	7.462.000	Sirgas 2000	20m	Peridomicile	03140138
535	2019	3	16	2019-03-16	05:47:03	Cuniculus paca	Lowland paca	1	D13	663.5	7.462.000	Sirgas 2000	20m	Peridomicile	03160150
536	2019	3	17	2019-03-17	03:40:18	Cuniculus paca	Lowland paca	1	D13	663.5	7.462.000	Sirgas 2000	20m	Peridomicile	03160158
537	2019	3	17	2019-03-17	05:22:10	Cuniculus paca	Lowland paca	1	D13	663.5	7.462.000	Sirgas 2000	20m	Peridomicile	03170161
538	2019	3	17	2019-03-17	12:35:06	Canis familiaris	Domestic dog	1	D13	663.5	7.462.000	Sirgas 2000	20m	Peridomicile	03170166
539	2019	3	18	2019-03-18	02:47:14	Cuniculus paca	Lowland paca	1	D13	663.5	7.462.000	Sirgas 2000	20m	Peridomicile	03170169
540	2019	3	18	2019-03-18	22:04:46	Cuniculus paca	Lowland paca	1	D13	663.5	7.462.000	Sirgas 2000	20m	Peridomicile	03180175
541	2019	3	19	2019-03-19	05:18:59	Cuniculus paca	Lowland paca	1	D13	663.5	7.462.000	Sirgas 2000	20m	Peridomicile	03190185
542	2019	3	19	2019-03-19	06:20:46	Didelphis aurita	Big-eared opossum	1	D13	663.5	7.462.000	Sirgas 2000	20m	Peridomicile	03190189
543	2019	3	20	2019-03-20	22:17:27	Cuniculus paca	Lowland paca	1	D13	663.5	7.462.000	Sirgas 2000	20m	Peridomicile	03200195
544	2019	3	22	2019-03-22	01:57:09	Cuniculus paca	Lowland paca	1	D13	663.5	7.462.000	Sirgas 2000	20m	Peridomicile	03200198
545	2019	3	22	2019-03-22	21:28:41	Cuniculus paca	Lowland paca	1	D13	663.5	7.462.000	Sirgas 2000	20m	Peridomicile	03220202
546	2019	3	23	2019-03-23	00:39:06	Cuniculus paca	Lowland paca	1	D13	663.5	7.462.000	Sirgas 2000	20m	Peridomicile	03220207
547	2019	3	23	2019-03-23	02:56:19	Cuniculus paca	Lowland paca	1	D13	663.5	7.462.000	Sirgas 2000	20m	Peridomicile	03230210
548	2019	3	24	2019-03-24	21:24:12	Cuniculus paca	Lowland paca	1	D13	663.5	7.462.000	Sirgas 2000	20m	Peridomicile	03240222
549	2019	3	25	2019-03-25	22:26:19	Cuniculus paca	Lowland paca	1	D13	663.5	7.462.000	Sirgas 2000	20m	Peridomicile	03250227
550	2019	3	27	2019-03-27	05:37:55	Didelphis aurita	Big-eared opossum	1	D13	663.5	7.462.000	Sirgas 2000	20m	Peridomicile	03270229
551	2019	3	27	2019-03-27	19:59:09	Cuniculus paca	Lowland paca	1	D13	663.5	7.462.000	Sirgas 2000	20m	Peridomicile	03270234
552	2019	3	29	2019-03-29	04:18:56	Procyon cancrivorus	Crab-eating raccoon	1	D13	663.5	7.462.000	Sirgas 2000	20m	Peridomicile	03290239
553	2019	4	1	2019-04-01	21:46:35	Cuniculus paca	Lowland paca	1	D13	663.5	7.462.000	Sirgas 2000	20m	Peridomicile	04010242
554	2019	4	2	2019-04-02	20:37:00	Cuniculus paca	Lowland paca	1	D13	663.5	7.462.000	Sirgas 2000	20m	Peridomicile	04020247
555	2019	4	10	2019-04-10	22:37:00	Cuniculus paca	Lowland paca	1	D13	663.5	7.462.000	Sirgas 2000	20m	Peridomicile	04100251
556	2019	4	15	2019-04-15	03:10:54	Cuniculus paca	Lowland paca	1	D13	663.5	7.462.000	Sirgas 2000	20m	Peridomicile	04150257
557	2019	4	25	2019-04-25	01:04:55	Sylvilagus tapetillus	Coastal tapeti	1	D13	663.5	7.462.000	Sirgas 2000	20m	Peridomicile	04250261
558	2019	4	28	2019-04-28	23:25:42	Didelphis aurita	Big-eared opossum	1	D13	663.5	7.462.000	Sirgas 2000	20m	Peridomicile	04280265
559	2019	4	29	2019-04-29	20:53:09	Sylvilagus tapetillus	Coastal tapeti	1	D13	663.5	7.462.000	Sirgas 2000	20m	Peridomicile	04290269
560	2019	5	5	2019-05-05	05:29:27	Didelphis aurita	Big-eared opossum	1	D13	663.5	7.462.000	Sirgas 2000	20m	Peridomicile	05050273
561	2019	5	5	2019-05-05	05:51:51	Sylvilagus tapetillus	Coastal tapeti	1	D13	663.5	7.462.000	Sirgas 2000	20m	Peridomicile	05050278
562	2019	5	6	2019-05-06	01:20:25	Sylvilagus tapetillus	Coastal tapeti	1	D13	663.5	7.462.000	Sirgas 2000	20m	Peridomicile	05060286
563	2019	5	9	2019-05-09	01:08:57	Cuniculus paca	Lowland paca	1	D13	663.5	7.462.000	Sirgas 2000	20m	Peridomicile	05090297
564	2019	5	17	2019-05-17	01:07:57	Didelphis aurita	Big-eared opossum	1	D13	663.5	7.462.000	Sirgas 2000	20m	Peridomicile	05170302
565	2019	5	19	2019-05-19	02:49:04	Didelphis aurita	Big-eared opossum	1	D13	663.5	7.462.000	Sirgas 2000	20m	Peridomicile	05190305
566	2019	5	20	2019-05-20	22:21:21	Cuniculus paca	Lowland paca	1	D13	663.5	7.462.000	Sirgas 2000	20m	Peridomicile	05200319
567	2019	5	22	2019-05-22	04:12:07	Didelphis aurita	Big-eared opossum	1	D13	663.5	7.462.000	Sirgas 2000	20m	Peridomicile	05220322
568	2019	5	23	2019-05-23	03:10:15	Didelphis aurita	Big-eared opossum	1	D13	663.5	7.462.000	Sirgas 2000	20m	Peridomicile	05230326
569	2019	5	28	2019-05-28	00:00:13	Cuniculus paca	Lowland paca	1	D13	663.5	7.462.000	Sirgas 2000	20m	Peridomicile	05280330
570	2019	5	30	2019-05-30	03:05:39	Cuniculus paca	Lowland paca	1	D13	663.5	7.462.000	Sirgas 2000	20m	Peridomicile	05300713
571	2019	6	1	2019-06-01	23:33:36	Sylvilagus tapetillus	Coastal tapeti	1	D13	663.5	7.462.000	Sirgas 2000	20m	Peridomicile	06010719
572	2019	6	7	2019-06-07	23:37:33	Cuniculus paca	Lowland paca	1	D13	663.5	7.462.000	Sirgas 2000	20m	Peridomicile	06070727
573	2019	6	8	2019-06-08	00:20:29	Cuniculus paca	Lowland paca	1	D13	663.5	7.462.000	Sirgas 2000	20m	Peridomicile	06080731
574	2019	6	13	2019-06-13	23:03:54	Didelphis aurita	Big-eared opossum	1	D13	663.5	7.462.000	Sirgas 2000	20m	Peridomicile	06130733
575	2019	6	16	2019-06-16	04:28:08	Didelphis aurita	Big-eared opossum	1	D13	663.5	7.462.000	Sirgas 2000	20m	Peridomicile	06160759
576	2019	6	18	2019-06-18	00:06:09	Didelphis aurita	Big-eared opossum	1	D13	663.5	7.462.000	Sirgas 2000	20m	Peridomicile	06180761
577	2019	6	23	2019-06-23	00:42:34	Didelphis aurita	Big-eared opossum	1	D13	663.5	7.462.000	Sirgas 2000	20m	Peridomicile	06230774
578	2019	7	1	2019-07-01	01:14:43	Sylvilagus tapetillus	Coastal tapeti	1	D13	663.5	7.462.000	Sirgas 2000	20m	Peridomicile	06230785
579	2018	9	15	2018-09-15	00:47:34	Didelphis aurita	Big-eared opossum	1	E08	662.25	7.461.750	Sirgas 2000	105m	Forest Core	9150015
580	2018	9	17	2018-09-17	03:28:57	Didelphis aurita	Big-eared opossum	1	E08	662.25	7.461.750	Sirgas 2000	105m	Forest Core	9170016
581	2018	9	17	2018-09-17	21:00:31	Didelphis aurita	Big-eared opossum	1	E08	662.25	7.461.750	Sirgas 2000	105m	Forest Core	9170019
583	2018	9	18	2018-09-18	20:31:27	Didelphis aurita	Big-eared opossum	1	E08	662.25	7.461.750	Sirgas 2000	105m	Forest Core	9180020
582	2018	9	20	2018-09-20	22:27:01	Didelphis aurita	Big-eared opossum	1	E08	662.25	7.461.750	Sirgas 2000	105m	Forest Core	9170021
584	2018	9	23	2018-09-23	12:35:16	Nasua nasua	Coati	1	E08	662.25	7.461.750	Sirgas 2000	105m	Forest Core	9230022
585	2018	9	27	2018-09-27	06:28:37	Nasua nasua	Coati	1	E08	662.25	7.461.750	Sirgas 2000	105m	Forest Core	9270025
586	2018	9	28	2018-09-28	05:03:38	Nasua nasua	Coati	1	E08	662.25	7.461.750	Sirgas 2000	105m	Forest Core	9280028
587	2018	10	3	2018-10-03	01:47:50	Didelphis aurita	Big-eared opossum	1	E08	662.25	7.461.750	Sirgas 2000	105m	Forest Core	10030032
588	2018	10	5	2018-10-05	15:51:40	Dasyprocta leporina	Red-rumped agouti	1	E08	662.25	7.461.750	Sirgas 2000	105m	Forest Core	10050035
589	2018	7	9	2018-07-09	21:08:59	Didelphis aurita	Big-eared opossum	1	E09	662.5	7.461.750	Sirgas 2000	50m	Transitional Forest	7090027
590	2018	7	10	2018-07-10	03:41:30	Didelphis aurita	Big-eared opossum	1	E09	662.5	7.461.750	Sirgas 2000	50m	Transitional Forest	7100028
591	2018	7	12	2018-07-12	17:43:03	Didelphis aurita	Big-eared opossum	1	E09	662.5	7.461.750	Sirgas 2000	50m	Transitional Forest	7120034
592	2018	7	15	2018-07-15	02:36:59	Didelphis aurita	Big-eared opossum	1	E09	662.5	7.461.750	Sirgas 2000	50m	Transitional Forest	7150035
593	2018	7	15	2018-07-15	04:02:04	Didelphis aurita	Big-eared opossum	1	E09	662.5	7.461.750	Sirgas 2000	50m	Transitional Forest	7150039
594	2018	11	2	2018-11-02	03:36:53	Nasua nasua	Coati	1	E10	662.75	7.461.750	Sirgas 2000	30m	Transitional Forest	11020007
595	2018	11	4	2018-11-04	06:43:44	Dasyprocta leporina	Red-rumped agouti	1	E10	662.75	7.461.750	Sirgas 2000	30m	Transitional Forest	11040037
596	2018	11	8	2018-11-08	20:50:21	Didelphis aurita	Big-eared opossum	1	E10	662.75	7.461.750	Sirgas 2000	30m	Transitional Forest	11080040
597	2018	11	9	2018-11-09	13:09:28	Canis familiaris	Domestic dog	1	E10	662.75	7.461.750	Sirgas 2000	30m	Transitional Forest	11090043
598	2018	11	11	2018-11-11	23:34:22	Didelphis aurita	Big-eared opossum	1	E10	662.75	7.461.750	Sirgas 2000	30m	Transitional Forest	11110058
599	2018	11	13	2018-11-13	11:52:32	Canis familiaris	Domestic dog	1	E10	662.75	7.461.750	Sirgas 2000	30m	Transitional Forest	11130064
600	2018	11	18	2018-11-18	00:32:36	Didelphis aurita	Big-eared opossum	1	E10	662.75	7.461.750	Sirgas 2000	30m	Transitional Forest	11180076
601	2018	11	20	2018-11-20	02:17:56	Didelphis aurita	Big-eared opossum	1	E10	662.75	7.461.750	Sirgas 2000	30m	Transitional Forest	11200079
602	2018	11	20	2018-11-20	22:19:31	Didelphis aurita	Big-eared opossum	1	E10	662.75	7.461.750	Sirgas 2000	30m	Transitional Forest	11200082
603	2018	11	21	2018-11-21	00:06:57	Didelphis aurita	Big-eared opossum	1	E10	662.75	7.461.750	Sirgas 2000	30m	Transitional Forest	11210085
604	2018	11	29	2018-11-29	04:14:52	Didelphis aurita	Big-eared opossum	1	E10	662.75	7.461.750	Sirgas 2000	30m	Transitional Forest	11290124
605	2018	12	1	2018-12-01	17:10:21	Dasyprocta leporina	Red-rumped agouti	1	E10	662.75	7.461.750	Sirgas 2000	30m	Transitional Forest	12010158
606	2018	12	4	2018-12-04	23:42:45	Didelphis aurita	Big-eared opossum	1	E10	662.75	7.461.750	Sirgas 2000	30m	Transitional Forest	12040168
607	2018	12	12	2018-12-12	13:09:55	Canis familiaris	Domestic dog	1	E10	662.75	7.461.750	Sirgas 2000	30m	Transitional Forest	12120173
608	2018	12	12	2018-12-12	16:58:03	Canis familiaris	Domestic dog	1	E10	662.75	7.461.750	Sirgas 2000	30m	Transitional Forest	12120176
609	2018	12	22	2018-12-22	19:53:39	Didelphis aurita	Big-eared opossum	1	E10	662.75	7.461.750	Sirgas 2000	30m	Transitional Forest	12220196
610	2018	12	23	2018-12-23	17:05:51	Dasyprocta leporina	Red-rumped agouti	1	E10	662.75	7.461.750	Sirgas 2000	30m	Transitional Forest	12230199
611	2018	12	31	2018-12-31	14:35:44	Canis familiaris	Domestic dog	1	E10	662.75	7.461.750	Sirgas 2000	30m	Transitional Forest	12310206
612	2019	1	7	2019-01-07	00:26:14	Didelphis aurita	Big-eared opossum	1	E10	662.75	7.461.750	Sirgas 2000	30m	Transitional Forest	1070215
613	2019	1	11	2019-01-11	15:20:58	Canis familiaris	Domestic dog	1	E10	662.75	7.461.750	Sirgas 2000	30m	Transitional Forest	1110217
614	2019	1	14	2019-01-14	03:00:27	Procyon cancrivorus	Crab-eating raccoon	1	E10	662.75	7.461.750	Sirgas 2000	30m	Transitional Forest	1110223
615	2019	1	17	2019-01-17	05:51:04	Didelphis aurita	Big-eared opossum	1	E10	662.75	7.461.750	Sirgas 2000	30m	Transitional Forest	1170004
616	2019	1	23	2019-01-23	12:21:42	Canis familiaris	Domestic dog	1	E10	662.75	7.461.750	Sirgas 2000	30m	Transitional Forest	1230014
617	2019	1	27	2019-01-27	05:23:40	Didelphis aurita	Big-eared opossum	1	E10	662.75	7.461.750	Sirgas 2000	30m	Transitional Forest	1270022
618	2019	2	1	2019-02-01	05:58:21	Dasypus novemcinctus	Nine-banded armadillo	1	E10	662.75	7.461.750	Sirgas 2000	30m	Transitional Forest	2010026
619	2019	2	6	2019-02-06	06:43:13	Cuniculus paca	Lowland paca	1	E10	662.75	7.461.750	Sirgas 2000	30m	Transitional Forest	2060037
620	2019	2	7	2019-02-07	04:49:11	Didelphis aurita	Big-eared opossum	1	E10	662.75	7.461.750	Sirgas 2000	30m	Transitional Forest	2070041
621	2019	2	7	2019-02-07	20:53:49	Didelphis aurita	Big-eared opossum	1	E10	662.75	7.461.750	Sirgas 2000	30m	Transitional Forest	2070050
624	2019	2	20	2019-02-20	12:14:45	Nasua nasua	Coati	1	E10	662.75	7.461.750	Sirgas 2000	30m	Transitional Forest	2200110
625	2019	2	26	2019-02-26	07:06:16	Dasyprocta leporina	Red-rumped agouti	2	E10	662.75	7.461.750	Sirgas 2000	30m	Transitional Forest	2260124
626	2019	3	5	2019-03-05	02:45:35	Canis familiaris	Domestic dog	2	E10	662.75	7.461.750	Sirgas 2000	30m	Transitional Forest	3050151
627	2019	3	5	2019-03-05	12:47:20	Canis familiaris	Domestic dog	1	E10	662.75	7.461.750	Sirgas 2000	30m	Transitional Forest	3050154
628	2019	3	7	2019-03-07	14:40:18	Canis familiaris	Domestic dog	1	E10	662.75	7.461.750	Sirgas 2000	30m	Transitional Forest	3070157
629	2019	3	8	2019-03-08	02:41:35	Didelphis aurita	Big-eared opossum	1	E10	662.75	7.461.750	Sirgas 2000	30m	Transitional Forest	3080163
630	2019	3	14	2019-03-14	02:33:10	Cuniculus paca	Lowland paca	1	E10	662.75	7.461.750	Sirgas 2000	30m	Transitional Forest	3140172
631	2019	3	24	2019-03-24	20:33:46	Didelphis aurita	Big-eared opossum	1	E10	662.75	7.461.750	Sirgas 2000	30m	Transitional Forest	3240208
632	2019	3	27	2019-03-27	17:28:33	Leopardus guttulus	Southern little spotted cat	1	E10	662.75	7.461.750	Sirgas 2000	30m	Transitional Forest	3270209
633	2019	3	28	2019-03-28	01:09:11	Procyon cancrivorus	Crab-eating raccoon	1	E10	662.75	7.461.750	Sirgas 2000	30m	Transitional Forest	3280214
634	2019	3	30	2019-03-30	08:01:58	Dasyprocta leporina	Red-rumped agouti	1	E10	662.75	7.461.750	Sirgas 2000	30m	Transitional Forest	3300228
635	2019	3	21	2019-03-31	07:42:50	Dasyprocta leporina	Red-rumped agouti	1	E10	662.75	7.461.750	Sirgas 2000	30m	Transitional Forest	3310242
636	2019	4	2	2019-04-02	06:16:13	Didelphis aurita	Big-eared opossum	1	E10	662.75	7.461.750	Sirgas 2000	30m	Transitional Forest	4020245
637	2019	4	8	2019-04-08	01:39:24	Procyon cancrivorus	Crab-eating raccoon	1	E10	662.75	7.461.750	Sirgas 2000	30m	Transitional Forest	4180261
638	2019	4	19	2019-04-19	23:12:21	Didelphis aurita	Big-eared opossum	1	E10	662.75	7.461.750	Sirgas 2000	30m	Transitional Forest	4190267
639	2019	4	20	2019-04-20	21:57:47	Didelphis aurita	Big-eared opossum	1	E10	662.75	7.461.750	Sirgas 2000	30m	Transitional Forest	4200274
640	2019	4	21	2019-04-21	03:06:07	Didelphis aurita	Big-eared opossum	1	E10	662.75	7.461.750	Sirgas 2000	30m	Transitional Forest	4200279
641	2019	4	21	2019-04-21	04:10:26	Didelphis aurita	Big-eared opossum	1	E10	662.75	7.461.750	Sirgas 2000	30m	Transitional Forest	4210283
642	2019	4	21	2019-04-21	16:27:58	Dasyprocta leporina	Red-rumped agouti	1	E10	662.75	7.461.750	Sirgas 2000	30m	Transitional Forest	4210289
643	2019	4	24	2019-04-24	18:44:16	Dasyprocta leporina	Red-rumped agouti	1	E10	662.75	7.461.750	Sirgas 2000	30m	Transitional Forest	4240295
644	2019	4	30	2019-04-30	07:50:30	Dasyprocta leporina	Red-rumped agouti	1	E10	662.75	7.461.750	Sirgas 2000	30m	Transitional Forest	4300297
645	2019	5	1	2019-05-01	04:46:54	Didelphis aurita	Big-eared opossum	1	E10	662.75	7.461.750	Sirgas 2000	30m	Transitional Forest	5010301
646	2019	5	4	2019-05-04	04:23:48	Dasypus novemcinctus	Nine-banded armadillo	1	E10	662.75	7.461.750	Sirgas 2000	30m	Transitional Forest	5040325
647	2019	5	10	2019-05-10	22:18:24	Tamandua tetradactyla	Southern tamandua	1	E10	662.75	7.461.750	Sirgas 2000	30m	Transitional Forest	50100331
648	2019	5	21	2019-05-21	01:38:00	Tamandua tetradactyla	Southern tamandua	1	E10	662.75	7.461.750	Sirgas 2000	30m	Transitional Forest	5210341
649	2019	5	23	2019-05-23	22:31:35	Didelphis aurita	Big-eared opossum	1	E10	662.75	7.461.750	Sirgas 2000	30m	Transitional Forest	5230349
650	2019	5	24	2019-05-24	02:13:57	Didelphis aurita	Big-eared opossum	1	E10	662.75	7.461.750	Sirgas 2000	30m	Transitional Forest	5240353
651	2019	5	24	2019-05-24	04:48:17	Didelphis aurita	Big-eared opossum	1	E10	662.75	7.461.750	Sirgas 2000	30m	Transitional Forest	5240357
652	2019	5	24	2019-05-24	19:39:58	Didelphis aurita	Big-eared opossum	1	E10	662.75	7.461.750	Sirgas 2000	30m	Transitional Forest	5240363
653	2019	5	29	2019-05-29	04:03:56	Didelphis aurita	Big-eared opossum	1	E10	662.75	7.461.750	Sirgas 2000	30m	Transitional Forest	5290374
654	2019	6	7	2019-06-07	19:16:50	Didelphis aurita	Big-eared opossum	1	E10	662.75	7.461.750	Sirgas 2000	30m	Transitional Forest	6070387
655	2019	6	11	2019-06-11	00:35:32	Didelphis aurita	Big-eared opossum	1	E10	662.75	7.461.750	Sirgas 2000	30m	Transitional Forest	6070393
656	2019	6	11	2019-06-11	01:38:18	Didelphis aurita	Big-eared opossum	1	E10	662.75	7.461.750	Sirgas 2000	30m	Transitional Forest	6070397
657	2019	6	11	2019-06-11	22:32:59	Didelphis aurita	Big-eared opossum	1	E10	662.75	7.461.750	Sirgas 2000	30m	Transitional Forest	6110402
658	2019	6	11	2019-06-11	23:40:07	Didelphis aurita	Big-eared opossum	1	E10	662.75	7.461.750	Sirgas 2000	30m	Transitional Forest	6110405
659	2019	6	12	2019-06-12	05:06:24	Didelphis aurita	Big-eared opossum	1	E10	662.75	7.461.750	Sirgas 2000	30m	Transitional Forest	6120411
660	2019	6	13	2019-06-13	23:03:55	Didelphis aurita	Big-eared opossum	1	E10	662.75	7.461.750	Sirgas 2000	30m	Transitional Forest	6130414
661	2019	6	15	2019-06-15	02:03:55	Didelphis aurita	Big-eared opossum	1	E10	662.75	7.461.750	Sirgas 2000	30m	Transitional Forest	6150418
662	2019	6	17	2019-06-17	07:16:00	Didelphis aurita	Big-eared opossum	1	E10	662.75	7.461.750	Sirgas 2000	30m	Transitional Forest	6170422
663	2019	6	18	2019-06-18	07:05:46	Didelphis aurita	Big-eared opossum	1	E10	662.75	7.461.750	Sirgas 2000	30m	Transitional Forest	6180426
664	2019	6	18	2019-06-18	23:22:05	Didelphis aurita	Big-eared opossum	1	E10	662.75	7.461.750	Sirgas 2000	30m	Transitional Forest	6180438
665	2019	6	21	2019-06-21	22:38:17	Didelphis aurita	Big-eared opossum	1	E10	662.75	7.461.750	Sirgas 2000	30m	Transitional Forest	6210446
666	2019	6	22	2019-06-22	01:04:31	Didelphis aurita	Big-eared opossum	1	E10	662.75	7.461.750	Sirgas 2000	30m	Transitional Forest	6220455
667	2019	6	22	2019-06-22	20:58:20	Didelphis aurita	Big-eared opossum	1	E10	662.75	7.461.750	Sirgas 2000	30m	Transitional Forest	6220457
668	2019	6	22	2019-06-22	21:59:52	Didelphis aurita	Big-eared opossum	1	E10	662.75	7.461.750	Sirgas 2000	30m	Transitional Forest	6220462
669	2019	6	22	2019-06-22	23:25:20	Didelphis aurita	Big-eared opossum	1	E10	662.75	7.461.750	Sirgas 2000	30m	Transitional Forest	6220465
670	2019	6	23	2019-06-23	01:04:14	Didelphis aurita	Big-eared opossum	1	E10	662.75	7.461.750	Sirgas 2000	30m	Transitional Forest	6230470
671	2019	6	23	2019-06-23	16:44:30	Leopardus guttulus	Southern little spotted cat	1	E10	662.75	7.461.750	Sirgas 2000	30m	Transitional Forest	6230473
672	2019	6	24	2019-06-24	00:00:39	Didelphis aurita	Big-eared opossum	1	E10	662.75	7.461.750	Sirgas 2000	30m	Transitional Forest	6240483
673	2019	6	24	2019-06-24	19:32:28	Didelphis aurita	Big-eared opossum	1	E10	662.75	7.461.750	Sirgas 2000	30m	Transitional Forest	6240486
674	2019	6	24	2019-06-24	20:57:36	Didelphis aurita	Big-eared opossum	1	E10	662.75	7.461.750	Sirgas 2000	30m	Transitional Forest	6240489
675	2019	6	24	2019-06-24	22:30:02	Didelphis aurita	Big-eared opossum	1	E10	662.75	7.461.750	Sirgas 2000	30m	Transitional Forest	6250501
676	2019	6	25	2019-06-25	04:57:35	Didelphis aurita	Big-eared opossum	1	E10	662.75	7.461.750	Sirgas 2000	30m	Transitional Forest	6250511
677	2019	6	25	2019-06-25	05:58:10	Didelphis aurita	Big-eared opossum	1	E10	662.75	7.461.750	Sirgas 2000	30m	Transitional Forest	6250513
678	2019	6	25	2019-06-25	21:48:18	Didelphis aurita	Big-eared opossum	1	E10	662.75	7.461.750	Sirgas 2000	30m	Transitional Forest	6250517
679	2019	6	26	2019-06-26	01:36:53	Didelphis aurita	Big-eared opossum	1	E10	662.75	7.461.750	Sirgas 2000	30m	Transitional Forest	6260522
680	2019	6	27	2019-06-27	11:27:17	Canis familiaris	Domestic dog	1	E10	662.75	7.461.750	Sirgas 2000	30m	Transitional Forest	6270525
681	2019	7	1	2019-07-01	04:11:38	Didelphis aurita	Big-eared opossum	1	E10	662.75	7.461.750	Sirgas 2000	30m	Transitional Forest	7010530
682	2019	7	3	2019-07-03	01:36:39	Didelphis aurita	Big-eared opossum	1	E10	662.75	7.461.750	Sirgas 2000	30m	Transitional Forest	7030533
683	2019	7	8	2019-07-08	01:27:37	Didelphis aurita	Big-eared opossum	1	E10	662.75	7.461.750	Sirgas 2000	30m	Transitional Forest	7080538
684	2019	7	10	2019-07-10	22:58:09	Didelphis aurita	Big-eared opossum	1	E10	662.75	7.461.750	Sirgas 2000	30m	Transitional Forest	7100546
685	2019	7	12	2019-07-12	20:27:15	Didelphis aurita	Big-eared opossum	1	E10	662.75	7.461.750	Sirgas 2000	30m	Transitional Forest	7120550
686	2019	7	12	2019-07-12	22:40:20	Didelphis aurita	Big-eared opossum	1	E10	662.75	7.461.750	Sirgas 2000	30m	Transitional Forest	7120553
687	2019	7	15	2019-07-15	23:12:12	Didelphis aurita	Big-eared opossum	1	E10	662.75	7.461.750	Sirgas 2000	30m	Transitional Forest	7150557
688	2019	7	16	2019-07-16	18:38:08	Dasyprocta leporina	Red-rumped agouti	1	E10	662.75	7.461.750	Sirgas 2000	30m	Transitional Forest	7160563
689	2019	7	16	2019-07-16	20:29:11	Didelphis aurita	Big-eared opossum	1	E10	662.75	7.461.750	Sirgas 2000	30m	Transitional Forest	7160565
690	2019	7	17	2019-07-17	01:53:28	Didelphis aurita	Big-eared opossum	1	E10	662.75	7.461.750	Sirgas 2000	30m	Transitional Forest	7160569
691	2019	7	17	2019-07-17	06:20:33	Didelphis aurita	Big-eared opossum	1	E10	662.75	7.461.750	Sirgas 2000	30m	Transitional Forest	7170575
692	2019	7	18	2019-07-18	02:01:48	Didelphis aurita	Big-eared opossum	1	E10	662.75	7.461.750	Sirgas 2000	30m	Transitional Forest	7180578
693	2019	7	19	2019-07-19	05:43:17	Didelphis aurita	Big-eared opossum	1	E10	662.75	7.461.750	Sirgas 2000	30m	Transitional Forest	7190589
694	2019	7	19	2019-07-19	21:00:43	Didelphis aurita	Big-eared opossum	1	E10	662.75	7.461.750	Sirgas 2000	30m	Transitional Forest	7190593
695	2019	7	20	2019-07-20	02:48:35	Didelphis aurita	Big-eared opossum	1	E10	662.75	7.461.750	Sirgas 2000	30m	Transitional Forest	7200597
696	2019	7	20	2019-07-20	04:08:57	Didelphis aurita	Big-eared opossum	1	E10	662.75	7.461.750	Sirgas 2000	30m	Transitional Forest	7210601
697	2019	7	20	2019-07-20	19:56:42	Didelphis aurita	Big-eared opossum	1	E10	662.75	7.461.750	Sirgas 2000	30m	Transitional Forest	7210605
698	2019	7	21	2019-07-21	03:22:31	Didelphis aurita	Big-eared opossum	1	E10	662.75	7.461.750	Sirgas 2000	30m	Transitional Forest	7210611
699	2019	7	21	2019-07-21	21:23:06	Didelphis aurita	Big-eared opossum	1	E10	662.75	7.461.750	Sirgas 2000	30m	Transitional Forest	7210619
700	2019	7	23	2019-07-23	01:15:53	Didelphis aurita	Big-eared opossum	1	E10	662.75	7.461.750	Sirgas 2000	30m	Transitional Forest	7230626
701	2019	7	24	2019-07-24	04:55:37	Didelphis aurita	Big-eared opossum	1	E10	662.75	7.461.750	Sirgas 2000	30m	Transitional Forest	7240629
702	2019	7	25	2019-07-25	21:11:42	Didelphis aurita	Big-eared opossum	1	E10	662.75	7.461.750	Sirgas 2000	30m	Transitional Forest	7250635
703	2019	7	26	2019-07-26	03:04:51	Didelphis aurita	Big-eared opossum	1	E10	662.75	7.461.750	Sirgas 2000	30m	Transitional Forest	7260637
704	2019	7	27	2019-07-27	03:49:47	Didelphis aurita	Big-eared opossum	1	E10	662.75	7.461.750	Sirgas 2000	30m	Transitional Forest	7270641
705	2019	7	27	2019-07-27	21:20:16	Didelphis aurita	Big-eared opossum	1	E10	662.75	7.461.750	Sirgas 2000	30m	Transitional Forest	7270645
706	2019	7	28	2019-07-28	22:27:40	Didelphis aurita	Big-eared opossum	1	E10	662.75	7.461.750	Sirgas 2000	30m	Transitional Forest	7280649
707	2019	7	29	2019-07-29	07:19:32	Didelphis aurita	Big-eared opossum	1	E10	662.75	7.461.750	Sirgas 2000	30m	Transitional Forest	7290654
708	2019	7	29	2019-07-29	19:17:02	Didelphis aurita	Big-eared opossum	1	E10	662.75	7.461.750	Sirgas 2000	30m	Transitional Forest	7290658
709	2019	7	30	2019-07-30	19:21:35	Dasyprocta leporina	Red-rumped agouti	1	E10	662.75	7.461.750	Sirgas 2000	30m	Transitional Forest	7300671
710	2019	7	31	2019-07-31	03:12:47	Didelphis aurita	Big-eared opossum	1	E10	662.75	7.461.750	Sirgas 2000	30m	Transitional Forest	7310679
711	2019	8	2	2019-08-02	02:42:00	Didelphis aurita	Big-eared opossum	1	E10	662.75	7.461.750	Sirgas 2000	30m	Transitional Forest	8020681
712	2019	8	3	2019-08-03	07:15:48	Didelphis aurita	Big-eared opossum	1	E10	662.75	7.461.750	Sirgas 2000	30m	Transitional Forest	8020685
713	2019	8	3	2019-08-03	19:33:40	Didelphis aurita	Big-eared opossum	1	E10	662.75	7.461.750	Sirgas 2000	30m	Transitional Forest	8020689
714	2019	8	3	2019-08-03	22:23:52	Didelphis aurita	Big-eared opossum	1	E10	662.75	7.461.750	Sirgas 2000	30m	Transitional Forest	8030693
715	2019	8	4	2019-08-04	23:24:22	Didelphis aurita	Big-eared opossum	1	E10	662.75	7.461.750	Sirgas 2000	30m	Transitional Forest	8040702
716	2019	8	5	2019-08-05	06:21:29	Didelphis aurita	Big-eared opossum	1	E10	662.75	7.461.750	Sirgas 2000	30m	Transitional Forest	8050706
717	2019	8	9	2019-08-09	21:47:07	Didelphis aurita	Big-eared opossum	1	E10	662.75	7.461.750	Sirgas 2000	30m	Transitional Forest	8090714
718	2019	8	10	2019-08-10	00:45:12	Didelphis aurita	Big-eared opossum	1	E10	662.75	7.461.750	Sirgas 2000	30m	Transitional Forest	8090719
719	2019	8	10	2019-08-10	21:58:12	Didelphis aurita	Big-eared opossum	1	E10	662.75	7.461.750	Sirgas 2000	30m	Transitional Forest	8100727
720	2019	8	11	2019-08-11	22:58:01	Didelphis aurita	Big-eared opossum	1	E10	662.75	7.461.750	Sirgas 2000	30m	Transitional Forest	8110731
721	2019	8	12	2019-08-12	23:49:31	Didelphis aurita	Big-eared opossum	1	E10	662.75	7.461.750	Sirgas 2000	30m	Transitional Forest	8120733
722	2019	8	14	2019-08-14	03:52:51	Didelphis aurita	Big-eared opossum	1	E10	662.75	7.461.750	Sirgas 2000	30m	Transitional Forest	8140746
723	2019	8	14	2019-08-14	08:28:39	Dasyprocta leporina	Red-rumped agouti	1	E10	662.75	7.461.750	Sirgas 2000	30m	Transitional Forest	8140753
724	2019	8	15	2019-08-15	08:08:04	Dasyprocta leporina	Red-rumped agouti	1	E10	662.75	7.461.750	Sirgas 2000	30m	Transitional Forest	8150757
725	2019	8	19	2019-08-19	06:20:02	Didelphis aurita	Big-eared opossum	1	E10	662.75	7.461.750	Sirgas 2000	30m	Transitional Forest	8190765
726	2019	8	23	2019-08-23	02:27:09	Didelphis aurita	Big-eared opossum	1	E10	662.75	7.461.750	Sirgas 2000	30m	Transitional Forest	8230770
727	2019	8	24	2019-08-24	21:05:32	Didelphis aurita	Big-eared opossum	1	E10	662.75	7.461.750	Sirgas 2000	30m	Transitional Forest	8240777
728	2019	8	25	2019-08-25	01:01:00	Didelphis aurita	Big-eared opossum	1	E10	662.75	7.461.750	Sirgas 2000	30m	Transitional Forest	8250782
729	2019	8	25	2019-08-25	05:32:58	Didelphis aurita	Big-eared opossum	1	E10	662.75	7.461.750	Sirgas 2000	30m	Transitional Forest	8250785
730	2019	8	26	2019-08-26	21:00:52	Didelphis aurita	Big-eared opossum	1	E10	662.75	7.461.750	Sirgas 2000	30m	Transitional Forest	8260790
731	2019	8	27	2019-08-27	00:56:23	Didelphis aurita	Big-eared opossum	1	E10	662.75	7.461.750	Sirgas 2000	30m	Transitional Forest	8270794
732	2018	9	15	2018-09-15	00:27:30	Didelphis aurita	Big-eared opossum	1	F06	661.75	7.461.500	Sirgas 2000	185m	Forest Core	9150020
733	2018	9	16	2018-09-16	00:22:56	Didelphis aurita	Big-eared opossum	1	F06	661.75	7.461.500	Sirgas 2000	185m	Forest Core	9160024
734	2018	9	17	2018-09-17	22:48:52	Didelphis aurita	Big-eared opossum	1	F06	661.75	7.461.500	Sirgas 2000	185m	Forest Core	9170028
736	2018	9	18	2018-09-18	23:31:42	Didelphis aurita	Big-eared opossum	1	F06	661.75	7.461.500	Sirgas 2000	185m	Forest Core	9180032
737	2018	9	20	2018-09-20	16:17:51	Dasyprocta leporina	Red-rumped agouti	1	F06	661.75	7.461.500	Sirgas 2000	185m	Forest Core	9200035
738	2018	9	26	2018-09-26	09:20:43	Dasyprocta leporina	Red-rumped agouti	1	F06	661.75	7.461.500	Sirgas 2000	185m	Forest Core	9260040
739	2018	9	26	2018-09-26	20:53:38	Didelphis aurita	Big-eared opossum	1	F06	661.75	7.461.500	Sirgas 2000	185m	Forest Core	9260042
740	2018	10	3	2018-10-03	17:54:03	Nasua nasua	Coati	1	F06	661.75	7.461.500	Sirgas 2000	185m	Forest Core	10030043
741	2018	10	8	2018-10-08	04:07:18	Didelphis aurita	Big-eared opossum	1	F06	661.75	7.461.500	Sirgas 2000	185m	Forest Core	10080048
742	2018	9	12	2018-09-12	08:59:48	Canis familiaris	Domestic dog	1	F07	662	7.461.500	Sirgas 2000	170m	Forest Core	9120099
743	2018	10	1	2018-10-01	13:18:26	Nasua nasua	Coati	1	F07	662	7.461.500	Sirgas 2000	170m	Forest Core	10010102
744	2018	10	2	2018-10-02	02:39:03	Canis familiaris	Domestic dog	1	F07	662	7.461.500	Sirgas 2000	170m	Forest Core	10010103
749	2019	1	24	2019-01-24	21:23:44	Procyon cancrivorus	Crab-eating raccoon	1	G04	661.25	7.461.250	Sirgas 2000	240m	Forest Core	1240102
750	2019	1	25	2019-01-25	03:02:45	Cuniculus paca	Lowland paca	1	G04	661.25	7.461.250	Sirgas 2000	240m	Forest Core	1250120
751	2019	1	27	2019-01-27	01:45:26	Didelphis aurita	Big-eared opossum	1	G04	661.25	7.461.250	Sirgas 2000	240m	Forest Core	1250148
752	2019	1	27	2019-01-27	20:53:58	Didelphis aurita	Big-eared opossum	1	G04	661.25	7.461.250	Sirgas 2000	240m	Forest Core	1280154
753	2019	1	28	2019-01-28	19:51:50	Didelphis aurita	Big-eared opossum	1	G04	661.25	7.461.250	Sirgas 2000	240m	Forest Core	1280164
754	2019	1	28	2019-01-28	23:32:37	Dasypus novemcinctus	Nine-banded armadillo	1	G04	661.25	7.461.250	Sirgas 2000	240m	Forest Core	1280168
755	2019	1	29	2019-01-29	02:25:59	Didelphis aurita	Big-eared opossum	1	G04	661.25	7.461.250	Sirgas 2000	240m	Forest Core	1290170
756	2019	1	29	2019-01-29	09:30:57	Dasyprocta leporina	Red-rumped agouti	1	G04	661.25	7.461.250	Sirgas 2000	240m	Forest Core	1290177
757	2019	1	30	2019-01-30	05:31:51	Procyon cancrivorus	Crab-eating raccoon	1	G04	661.25	7.461.250	Sirgas 2000	240m	Forest Core	1290184
758	2019	1	31	2019-01-31	08:43:40	Dasyprocta leporina	Red-rumped agouti	1	G04	661.25	7.461.250	Sirgas 2000	240m	Forest Core	1290190
759	2019	1	31	2019-01-31	16:39:51	Dasyprocta leporina	Red-rumped agouti	1	G04	661.25	7.461.250	Sirgas 2000	240m	Forest Core	1310201
760	2019	2	1	2019-02-01	16:25:06	Procyon cancrivorus	Crab-eating raccoon	1	G04	661.25	7.461.250	Sirgas 2000	240m	Forest Core	2010209
761	2019	2	1	2019-02-01	22:36:06	Dasypus novemcinctus	Nine-banded armadillo	1	G04	661.25	7.461.250	Sirgas 2000	240m	Forest Core	2010219
762	2019	2	2	2019-02-02	02:30:04	Cuniculus paca	Lowland paca	1	G04	661.25	7.461.250	Sirgas 2000	240m	Forest Core	2020251
763	2019	2	2	2019-02-02	04:28:46	Procyon cancrivorus	Crab-eating raccoon	1	G04	661.25	7.461.250	Sirgas 2000	240m	Forest Core	2020257
764	2019	2	2	2019-02-02	22:59:43	Dasypus novemcinctus	Nine-banded armadillo	1	G04	661.25	7.461.250	Sirgas 2000	240m	Forest Core	2020265
765	2019	2	4	2019-02-04	04:07:45	Cuniculus paca	Lowland paca	1	G04	661.25	7.461.250	Sirgas 2000	240m	Forest Core	2040266
766	2019	2	8	2019-02-08	23:41:15	Cuniculus paca	Lowland paca	1	G04	661.25	7.461.250	Sirgas 2000	240m	Forest Core	2080287
767	2019	2	13	2019-02-13	20:31:15	Cuniculus paca	Lowland paca	2	G04	661.25	7.461.250	Sirgas 2000	240m	Forest Core	2130305
768	2019	2	15	2019-02-15	06:28:47	Procyon cancrivorus	Crab-eating raccoon	1	G04	661.25	7.461.250	Sirgas 2000	240m	Forest Core	2150309
769	2019	2	20	2019-02-20	07:43:34	Dasyprocta leporina	Red-rumped agouti	1	G04	661.25	7.461.250	Sirgas 2000	240m	Forest Core	2200312
770	2019	2	20	2019-02-20	20:50:44	Cuniculus paca	Lowland paca	1	G04	661.25	7.461.250	Sirgas 2000	240m	Forest Core	2200323
771	2019	2	21	2019-02-21	23:46:38	Didelphis aurita	Big-eared opossum	1	G04	661.25	7.461.250	Sirgas 2000	240m	Forest Core	2210328
772	2019	2	24	2019-02-24	01:28:14	Dasypus novemcinctus	Nine-banded armadillo	1	G04	661.25	7.461.250	Sirgas 2000	240m	Forest Core	2240336
773	2019	2	27	2019-02-27	08:18:08	Dasyprocta leporina	Red-rumped agouti	1	G04	661.25	7.461.250	Sirgas 2000	240m	Forest Core	2270347
774	2019	2	28	2019-02-28	00:11:33	Dasypus novemcinctus	Nine-banded armadillo	1	G04	661.25	7.461.250	Sirgas 2000	240m	Forest Core	2280350
775	2019	2	28	2019-02-28	08:15:54	Dasyprocta leporina	Red-rumped agouti	1	G04	661.25	7.461.250	Sirgas 2000	240m	Forest Core	2280358
776	2019	3	1	2019-03-01	04:30:08	Dasypus novemcinctus	Nine-banded armadillo	1	G04	661.25	7.461.250	Sirgas 2000	240m	Forest Core	3010362
777	2019	3	6	2019-03-06	05:51:43	Dasypus novemcinctus	Nine-banded armadillo	1	G04	661.25	7.461.250	Sirgas 2000	240m	Forest Core	3060382
778	2019	3	9	2019-03-09	04:34:05	Procyon cancrivorus	Crab-eating raccoon	1	G04	661.25	7.461.250	Sirgas 2000	240m	Forest Core	3090406
779	2019	3	12	2019-03-12	23:40:18	Dasypus novemcinctus	Nine-banded armadillo	1	G04	661.25	7.461.250	Sirgas 2000	240m	Forest Core	3120414
780	2019	3	14	2019-03-14	22:32:25	Dasypus novemcinctus	Nine-banded armadillo	1	G04	661.25	7.461.250	Sirgas 2000	240m	Forest Core	3140418
781	2019	3	17	2019-03-17	05:49:21	Procyon cancrivorus	Crab-eating raccoon	1	G04	661.25	7.461.250	Sirgas 2000	240m	Forest Core	3170429
782	2019	3	23	2019-03-23	20:16:22	Cuniculus paca	Lowland paca	1	G04	661.25	7.461.250	Sirgas 2000	240m	Forest Core	3230436
783	2019	3	24	2019-03-24	01:14:18	Didelphis aurita	Big-eared opossum	1	G04	661.25	7.461.250	Sirgas 2000	240m	Forest Core	3240441
784	2019	3	27	2019-03-27	01:48:29	Didelphis aurita	Big-eared opossum	1	G04	661.25	7.461.250	Sirgas 2000	240m	Forest Core	3270453
785	2019	3	27	2019-03-27	10:26:50	Nasua nasua	Coati	2	G04	661.25	7.461.250	Sirgas 2000	240m	Forest Core	3270457
786	2019	3	29	2019-03-29	08:29:40	Dasyprocta leporina	Red-rumped agouti	1	G04	661.25	7.461.250	Sirgas 2000	240m	Forest Core	3290466
787	2019	3	30	2019-03-30	21:28:08	Didelphis aurita	Big-eared opossum	1	G04	661.25	7.461.250	Sirgas 2000	240m	Forest Core	3300493
788	2019	3	30	2019-03-30	22:32:32	Dasypus novemcinctus	Nine-banded armadillo	1	G04	661.25	7.461.250	Sirgas 2000	240m	Forest Core	3300494
789	2019	3	31	2019-03-31	20:17:44	Didelphis aurita	Big-eared opossum	1	G04	661.25	7.461.250	Sirgas 2000	240m	Forest Core	3310501
790	2019	3	31	2019-03-31	22:38:41	Cuniculus paca	Lowland paca	1	G04	661.25	7.461.250	Sirgas 2000	240m	Forest Core	3310505
791	2019	4	1	2019-04-01	19:20:02	Didelphis aurita	Big-eared opossum	1	G04	661.25	7.461.250	Sirgas 2000	240m	Forest Core	4010509
792	2019	4	1	2019-04-01	20:35:55	Cuniculus paca	Lowland paca	1	G04	661.25	7.461.250	Sirgas 2000	240m	Forest Core	4010511
793	2019	4	2	2019-04-02	08:53:30	Dasyprocta leporina	Red-rumped agouti	1	G04	661.25	7.461.250	Sirgas 2000	240m	Forest Core	4020532
794	2019	4	3	2019-04-03	03:08:51	Cuniculus paca	Lowland paca	1	G04	661.25	7.461.250	Sirgas 2000	240m	Forest Core	4030537
795	2019	4	5	2019-04-05	09:27:28	Dasyprocta leporina	Red-rumped agouti	1	G04	661.25	7.461.250	Sirgas 2000	240m	Forest Core	4050541
920	2019	4	7	2019-04-07	03:54:54	Didelphis aurita	Big-eared opossum	1	G04	661.25	7.461.250	Sirgas 2000	240m	Forest Core	04070245
921	2019	4	7	2019-04-07	06:29:45	Dasypus novemcinctus	Nine-banded armadillo	1	G04	661.25	7.461.250	Sirgas 2000	240m	Forest Core	04070249
922	2019	4	7	2019-04-07	22:15:55	Didelphis aurita	Big-eared opossum	1	G04	661.25	7.461.250	Sirgas 2000	240m	Forest Core	04070254
923	2019	4	8	2019-04-08	00:53:22	Dasypus novemcinctus	Nine-banded armadillo	1	G04	661.25	7.461.250	Sirgas 2000	240m	Forest Core	04080256
924	2019	4	9	2019-04-09	04:13:31	Procyon cancrivorus	Crab-eating raccoon	1	G04	661.25	7.461.250	Sirgas 2000	240m	Forest Core	04090264
925	2019	4	10	2019-04-10	02:37:28	Didelphis aurita	Big-eared opossum	1	G04	661.25	7.461.250	Sirgas 2000	240m	Forest Core	04100269
926	2019	4	13	2019-04-13	08:19:43	Tamandua tetradactyla	Southern tamandua	1	G04	661.25	7.461.250	Sirgas 2000	240m	Forest Core	04130272
927	2019	4	14	2019-04-14	22:19:50	Tamandua tetradactyla	Southern tamandua	1	G04	661.25	7.461.250	Sirgas 2000	240m	Forest Core	04140281
928	2019	4	15	2019-04-15	00:38:19	Procyon cancrivorus	Crab-eating raccoon	1	G04	661.25	7.461.250	Sirgas 2000	240m	Forest Core	04150286
929	2019	4	16	2019-04-16	08:08:29	Dasyprocta leporina	Red-rumped agouti	1	G04	661.25	7.461.250	Sirgas 2000	240m	Forest Core	04160300
930	2019	4	17	2019-04-17	07:02:24	Dasyprocta leporina	Red-rumped agouti	1	G04	661.25	7.461.250	Sirgas 2000	240m	Forest Core	04170308
931	2019	4	18	2019-04-18	09:04:19	Dasyprocta leporina	Red-rumped agouti	1	G04	661.25	7.461.250	Sirgas 2000	240m	Forest Core	04180312
932	2019	4	21	2019-04-21	22:09:19	Didelphis aurita	Big-eared opossum	1	G04	661.25	7.461.250	Sirgas 2000	240m	Forest Core	04210318
933	2019	4	22	2019-04-22	07:16:27	Procyon cancrivorus	Crab-eating raccoon	1	G04	661.25	7.461.250	Sirgas 2000	240m	Forest Core	04220320
934	2019	4	26	2019-04-26	07:37:43	Dasyprocta leporina	Red-rumped agouti	1	G04	661.25	7.461.250	Sirgas 2000	240m	Forest Core	04260329
935	2019	4	27	2019-04-27	05:03:06	Dasypus novemcinctus	Nine-banded armadillo	1	G04	661.25	7.461.250	Sirgas 2000	240m	Forest Core	04270340
936	2019	4	30	2019-04-30	20:38:15	Didelphis aurita	Big-eared opossum	1	G04	661.25	7.461.250	Sirgas 2000	240m	Forest Core	04300352
937	2019	5	3	2019-05-03	22:11:21	Cuniculus paca	Lowland paca	1	G04	661.25	7.461.250	Sirgas 2000	240m	Forest Core	05030356
938	2019	5	4	2019-05-04	02:08:41	Procyon cancrivorus	Crab-eating raccoon	1	G04	661.25	7.461.250	Sirgas 2000	240m	Forest Core	05040365
939	2019	5	6	2019-05-06	06:58:12	Procyon cancrivorus	Crab-eating raccoon	1	G04	661.25	7.461.250	Sirgas 2000	240m	Forest Core	05060373
940	2019	5	9	2019-05-09	23:23:02	Procyon cancrivorus	Crab-eating raccoon	1	G04	661.25	7.461.250	Sirgas 2000	240m	Forest Core	05090381
941	2019	5	10	2019-05-10	00:54:16	Cuniculus paca	Lowland paca	1	G04	661.25	7.461.250	Sirgas 2000	240m	Forest Core	05100384
942	2019	5	10	2019-05-10	02:32:50	Procyon cancrivorus	Crab-eating raccoon	1	G04	661.25	7.461.250	Sirgas 2000	240m	Forest Core	05100388
943	2019	5	10	2019-05-10	22:54:13	Didelphis aurita	Big-eared opossum	1	G04	661.25	7.461.250	Sirgas 2000	240m	Forest Core	05100396
944	2019	5	14	2019-05-14	10:56:10	Dasyprocta leporina	Red-rumped agouti	1	G04	661.25	7.461.250	Sirgas 2000	240m	Forest Core	05140404
945	2019	5	17	2019-05-17	06:58:44	Procyon cancrivorus	Crab-eating raccoon	1	G04	661.25	7.461.250	Sirgas 2000	240m	Forest Core	05170409
946	2019	5	18	2019-05-18	01:31:00	Cuniculus paca	Lowland paca	1	G04	661.25	7.461.250	Sirgas 2000	240m	Forest Core	05180413
947	2019	5	18	2019-05-18	19:25:13	Cuniculus paca	Lowland paca	1	G04	661.25	7.461.250	Sirgas 2000	240m	Forest Core	05180417
948	2019	5	18	2019-05-18	20:01:58	Procyon cancrivorus	Crab-eating raccoon	1	G04	661.25	7.461.250	Sirgas 2000	240m	Forest Core	05180426
949	2019	5	20	2019-05-20	22:24:31	Procyon cancrivorus	Crab-eating raccoon	1	G04	661.25	7.461.250	Sirgas 2000	240m	Forest Core	05200428
950	2019	5	22	2019-05-22	21:10:54	Cuniculus paca	Lowland paca	1	G04	661.25	7.461.250	Sirgas 2000	240m	Forest Core	05220441
951	2019	5	22	2019-05-22	21:34:08	Procyon cancrivorus	Crab-eating raccoon	1	G04	661.25	7.461.250	Sirgas 2000	240m	Forest Core	05220446
952	2019	5	26	2019-05-26	21:37:36	Didelphis aurita	Big-eared opossum	1	G04	661.25	7.461.250	Sirgas 2000	240m	Forest Core	05260452
953	2019	5	27	2019-05-27	17:05:18	Dasyprocta leporina	Red-rumped agouti	1	G04	661.25	7.461.250	Sirgas 2000	240m	Forest Core	05270457
954	2019	5	27	2019-05-27	22:33:00	Didelphis aurita	Big-eared opossum	1	G04	661.25	7.461.250	Sirgas 2000	240m	Forest Core	05270461
955	2019	5	29	2019-05-29	02:34:43	Cuniculus paca	Lowland paca	1	G04	661.25	7.461.250	Sirgas 2000	240m	Forest Core	05290465
956	2019	5	30	2019-05-30	02:16:19	Didelphis aurita	Big-eared opossum	1	G04	661.25	7.461.250	Sirgas 2000	240m	Forest Core	05300468
957	2019	6	1	2019-06-01	00:28:55	Cuniculus paca	Lowland paca	1	G04	661.25	7.461.250	Sirgas 2000	240m	Forest Core	06010472
958	2019	6	1	2019-06-01	01:22:47	Didelphis aurita	Big-eared opossum	1	G04	661.25	7.461.250	Sirgas 2000	240m	Forest Core	06010476
959	2019	6	7	2019-06-07	23:02:10	Cuniculus paca	Lowland paca	1	G04	661.25	7.461.250	Sirgas 2000	240m	Forest Core	06070480
960	2019	6	11	2019-06-11	01:06:24	Didelphis aurita	Big-eared opossum	1	G04	661.25	7.461.250	Sirgas 2000	240m	Forest Core	06110484
961	2019	6	12	2019-06-12	04:31:48	Didelphis aurita	Big-eared opossum	1	G04	661.25	7.461.250	Sirgas 2000	240m	Forest Core	06120489
962	2019	6	13	2019-06-13	09:02:02	Dasyprocta leporina	Red-rumped agouti	1	G04	661.25	7.461.250	Sirgas 2000	240m	Forest Core	06130493
1008	2019	8	12	2019-08-12	18:39:32	Dasyprocta leporina	Red-rumped agouti	1	G04	661.25	7.461.250	Sirgas 2000	240m	Forest Core	08120778
970	2019	7	1	01/07/2019	02:36:08	Dasypus novemcinctus	Nine-banded armadillo	1	G04	661.25	7.461.250	Sirgas 2000	240m	Forest Core	07010536
971	2019	7	1	01/07/2019	11:33:54	Dasyprocta leporina	Red-rumped agouti	1	G04	661.25	7.461.250	Sirgas 2000	240m	Forest Core	07010540
993	2019	8	1	01/08/2019	09:20:29	Dasyprocta leporina	Red-rumped agouti	1	G04	661.25	7.461.250	Sirgas 2000	240m	Forest Core	08010688
994	2019	8	2	02/08/2019	01:42:27	Cuniculus paca	Lowland paca	1	G04	661.25	7.461.250	Sirgas 2000	240m	Forest Core	08020692
972	2019	7	4	04/07/2019	03:54:21	Didelphis aurita	Big-eared opossum	1	G04	661.25	7.461.250	Sirgas 2000	240m	Forest Core	07040556
995	2019	8	5	05/08/2019	19:25:45	Cuniculus paca	Lowland paca	1	G04	661.25	7.461.250	Sirgas 2000	240m	Forest Core	08050708
996	2019	8	6	06/08/2019	09:09:17	Dasyprocta leporina	Red-rumped agouti	1	G04	661.25	7.461.250	Sirgas 2000	240m	Forest Core	08060712
997	2019	8	6	06/08/2019	19:24:36	Cuniculus paca	Lowland paca	1	G04	661.25	7.461.250	Sirgas 2000	240m	Forest Core	08060716
973	2019	7	7	07/07/2019	09:54:15	Dasyprocta leporina	Red-rumped agouti	1	G04	661.25	7.461.250	Sirgas 2000	240m	Forest Core	07070561
998	2019	8	7	07/08/2019	00:53:52	Cuniculus paca	Lowland paca	1	G04	661.25	7.461.250	Sirgas 2000	240m	Forest Core	08070720
999	2019	8	7	07/08/2019	07:36:43	Dasyprocta leporina	Red-rumped agouti	1	G04	661.25	7.461.250	Sirgas 2000	240m	Forest Core	08070726
1000	2019	8	7	07/08/2019	09:36:07	Dasyprocta leporina	Red-rumped agouti	1	G04	661.25	7.461.250	Sirgas 2000	240m	Forest Core	08070729
1001	2019	8	8	08/08/2019	03:35:27	Cuniculus paca	Lowland paca	1	G04	661.25	7.461.250	Sirgas 2000	240m	Forest Core	08080740
1002	2019	8	8	08/08/2019	23:47:42	Didelphis aurita	Big-eared opossum	1	G04	661.25	7.461.250	Sirgas 2000	240m	Forest Core	08080744
1003	2019	8	9	09/08/2019	07:25:56	Dasyprocta leporina	Red-rumped agouti	1	G04	661.25	7.461.250	Sirgas 2000	240m	Forest Core	08090749
1004	2019	8	10	10/08/2019	08:51:02	Dasyprocta leporina	Red-rumped agouti	1	G04	661.25	7.461.250	Sirgas 2000	240m	Forest Core	08100753
974	2019	7	11	11/07/2019	02:50:44	Didelphis aurita	Big-eared opossum	1	G04	661.25	7.461.250	Sirgas 2000	240m	Forest Core	07110566
1005	2019	8	11	11/08/2019	03:54:04	Cuniculus paca	Lowland paca	1	G04	661.25	7.461.250	Sirgas 2000	240m	Forest Core	08110765
1006	2019	8	11	11/08/2019	18:32:53	Dasyprocta leporina	Red-rumped agouti	1	G04	661.25	7.461.250	Sirgas 2000	240m	Forest Core	08110771
975	2019	7	12	12/07/2019	02:42:58	Didelphis aurita	Big-eared opossum	1	G04	661.25	7.461.250	Sirgas 2000	240m	Forest Core	07120574
976	2019	7	12	12/07/2019	13:50:39	Dasyprocta leporina	Red-rumped agouti	1	G04	661.25	7.461.250	Sirgas 2000	240m	Forest Core	07120576
1007	2019	8	12	12/08/2019	08:27:41	Dasyprocta leporina	Red-rumped agouti	1	G04	661.25	7.461.250	Sirgas 2000	240m	Forest Core	08120774
963	2019	6	14	14/06/2019	04:26:00	Cuniculus paca	Lowland paca	1	G04	661.25	7.461.250	Sirgas 2000	240m	Forest Core	06140497
964	2019	6	15	15/06/2019	09:30:29	Dasyprocta leporina	Red-rumped agouti	1	G04	661.25	7.461.250	Sirgas 2000	240m	Forest Core	06150500
977	2019	7	15	15/07/2019	09:53:42	Dasyprocta leporina	Red-rumped agouti	1	G04	661.25	7.461.250	Sirgas 2000	240m	Forest Core	07150580
978	2019	7	15	15/07/2019	12:15:20	Dasyprocta leporina	Red-rumped agouti	1	G04	661.25	7.461.250	Sirgas 2000	240m	Forest Core	07150584
965	2019	6	16	16/06/2019	02:37:20	Dasypus novemcinctus	Nine-banded armadillo	1	G04	661.25	7.461.250	Sirgas 2000	240m	Forest Core	06160509
966	2019	6	18	18/06/2019	03:54:25	Didelphis aurita	Big-eared opossum	1	G04	661.25	7.461.250	Sirgas 2000	240m	Forest Core	06180513
967	2019	6	21	21/06/2019	19:03:46	Cuniculus paca	Lowland paca	1	G04	661.25	7.461.250	Sirgas 2000	240m	Forest Core	06210517
979	2019	7	21	21/07/2019	04:10:10	Didelphis aurita	Big-eared opossum	1	G04	661.25	7.461.250	Sirgas 2000	240m	Forest Core	07210594
980	2019	7	21	21/07/2019	19:38:58	Cuniculus paca	Lowland paca	1	G04	661.25	7.461.250	Sirgas 2000	240m	Forest Core	07210601
981	2019	7	22	22/07/2019	01:31:36	Didelphis aurita	Big-eared opossum	1	G04	661.25	7.461.250	Sirgas 2000	240m	Forest Core	07220610
982	2019	7	22	22/07/2019	02:38:24	Cuniculus paca	Lowland paca	1	G04	661.25	7.461.250	Sirgas 2000	240m	Forest Core	07220613
983	2019	7	22	22/07/2019	03:55:28	Didelphis aurita	Big-eared opossum	1	G04	661.25	7.461.250	Sirgas 2000	240m	Forest Core	07220616
984	2019	7	22	22/07/2019	14:47:43	Dasyprocta leporina	Red-rumped agouti	1	G04	661.25	7.461.250	Sirgas 2000	240m	Forest Core	07220620
985	2019	7	23	23/07/2019	18:53:11	Dasyprocta leporina	Red-rumped agouti	1	G04	661.25	7.461.250	Sirgas 2000	240m	Forest Core	07230630
986	2019	7	24	24/07/2019	21:27:33	Cuniculus paca	Lowland paca	1	G04	661.25	7.461.250	Sirgas 2000	240m	Forest Core	07240633
987	2019	7	27	27/07/2019	01:04:41	Procyon cancrivorus	Crab-eating raccoon	1	G04	661.25	7.461.250	Sirgas 2000	240m	Forest Core	07270648
988	2019	7	28	28/07/2019	03:37:53	Didelphis aurita	Big-eared opossum	1	G04	661.25	7.461.250	Sirgas 2000	240m	Forest Core	07280668
989	2019	7	29	29/07/2019	23:41:32	Cuniculus paca	Lowland paca	1	G04	661.25	7.461.250	Sirgas 2000	240m	Forest Core	07280672
968	2019	6	30	30/06/2019	01:03:59	Didelphis aurita	Big-eared opossum	1	G04	661.25	7.461.250	Sirgas 2000	240m	Forest Core	06300524
969	2019	6	30	30/06/2019	02:25:00	Didelphis aurita	Big-eared opossum	1	G04	661.25	7.461.250	Sirgas 2000	240m	Forest Core	06300528
990	2019	7	30	30/07/2019	03:32:49	Didelphis aurita	Big-eared opossum	1	G04	661.25	7.461.250	Sirgas 2000	240m	Forest Core	07300676
991	2019	7	30	30/07/2019	10:19:53	Dasyprocta leporina	Red-rumped agouti	1	G04	661.25	7.461.250	Sirgas 2000	240m	Forest Core	07300680
992	2019	7	31	31/07/2019	08:55:43	Dasyprocta leporina	Red-rumped agouti	1	G04	661.25	7.461.250	Sirgas 2000	240m	Forest Core	07310686
796	2019	1	29	2019-01-29	23:53:07	Dasypus novemcinctus	Nine-banded armadillo	1	G05	661.5	7.461.250	Sirgas 2000	165m	Forest Core	1290054
797	2019	1	1	2019-02-01	01:41:41	Canis familiaris	Domestic dog	1	G05	661.5	7.461.250	Sirgas 2000	165m	Forest Core	2010059
798	2019	2	2	2019-02-02	22:04:10	Tamandua tetradactyla	Southern tamandua	1	G05	661.5	7.461.250	Sirgas 2000	165m	Forest Core	2020065
799	2019	2	3	2019-02-03	22:09:43	Dasypus novemcinctus	Nine-banded armadillo	1	G05	661.5	7.461.250	Sirgas 2000	165m	Forest Core	2030069
800	2019	2	4	2019-02-04	22:39:55	Cuniculus paca	Lowland paca	1	G05	661.5	7.461.250	Sirgas 2000	165m	Forest Core	2040072
801	2019	2	5	2019-02-05	04:22:43	Cuniculus paca	Lowland paca	1	G05	661.5	7.461.250	Sirgas 2000	165m	Forest Core	2050077
802	2019	2	13	2019-02-13	02:16:46	Cuniculus paca	Lowland paca	1	G05	661.5	7.461.250	Sirgas 2000	165m	Forest Core	2130085
803	2019	2	27	2019-02-27	20:15:13	Didelphis aurita	Big-eared opossum	1	G05	661.5	7.461.250	Sirgas 2000	165m	Forest Core	2270113
804	2019	3	2	2019-03-02	01:35:14	Tamandua tetradactyla	Southern tamandua	1	G05	661.5	7.461.250	Sirgas 2000	165m	Forest Core	3020124
805	2019	3	7	2019-03-07	02:05:34	Cuniculus paca	Lowland paca	1	G05	661.5	7.461.250	Sirgas 2000	165m	Forest Core	3070190
806	2019	3	9	2019-03-09	02:37:45	Cuniculus paca	Lowland paca	1	G05	661.5	7.461.250	Sirgas 2000	165m	Forest Core	3090196
807	2019	3	9	2019-03-09	04:56:12	Procyon cancrivorus	Crab-eating raccoon	1	G05	661.5	7.461.250	Sirgas 2000	165m	Forest Core	3090200
808	2019	3	10	2019-03-10	20:30:35	Dasypus novemcinctus	Nine-banded armadillo	1	G05	661.5	7.461.250	Sirgas 2000	165m	Forest Core	3100204
809	2019	3	12	2019-03-12	20:12:22	Cuniculus paca	Lowland paca	1	G05	661.5	7.461.250	Sirgas 2000	165m	Forest Core	3120209
810	2019	3	12	2019-03-12	23:16:23	Dasypus novemcinctus	Nine-banded armadillo	1	G05	661.5	7.461.250	Sirgas 2000	165m	Forest Core	3120213
811	2019	3	13	2019-03-13	01:28:40	Cuniculus paca	Lowland paca	1	G05	661.5	7.461.250	Sirgas 2000	165m	Forest Core	3130217
812	2019	3	15	2019-03-15	04:40:27	Cuniculus paca	Lowland paca	1	G05	661.5	7.461.250	Sirgas 2000	165m	Forest Core	3150242
815	2019	3	17	2019-03-17	02:39:18	Cuniculus paca	Lowland paca	1	G05	661.5	7.461.250	Sirgas 2000	165m	Forest Core	3170257
816	2019	3	17	2019-03-17	03:01:58	Didelphis aurita	Big-eared opossum	1	G05	661.5	7.461.250	Sirgas 2000	165m	Forest Core	3170264
817	2019	3	19	2019-03-19	16:19:09	Nasua nasua	Coati	1	G05	661.5	7.461.250	Sirgas 2000	165m	Forest Core	3190289
818	2019	3	24	2019-03-24	02:25:51	Canis familiaris	Domestic dog	1	G05	661.5	7.461.250	Sirgas 2000	165m	Forest Core	3240296
819	2019	3	27	2019-03-27	02:16:21	Cuniculus paca	Lowland paca	1	G05	661.5	7.461.250	Sirgas 2000	165m	Forest Core	3270313
820	2019	3	27	2019-03-27	21:18:20	Procyon cancrivorus	Crab-eating raccoon	1	G05	661.5	7.461.250	Sirgas 2000	165m	Forest Core	3270318
821	2019	4	6	2019-04-06	19:11:22	Dasypus novemcinctus	Nine-banded armadillo	1	G05	661.5	7.461.250	Sirgas 2000	165m	Forest Core	4060009
822	2019	4	10	2019-04-10	23:43:25	Dasypus novemcinctus	Nine-banded armadillo	1	G05	661.5	7.461.250	Sirgas 2000	165m	Forest Core	4100037
823	2019	4	11	2019-04-11	10:33:17	Canis familiaris	Domestic dog	1	G05	661.5	7.461.250	Sirgas 2000	165m	Forest Core	4110041
824	2019	4	15	2019-04-15	03:07:28	Leopardus guttulus	Southern little spotted cat	1	G05	661.5	7.461.250	Sirgas 2000	165m	Forest Core	4150045
825	2019	4	16	2019-04-16	21:30:09	Leopardus guttulus	Southern little spotted cat	1	G05	661.5	7.461.250	Sirgas 2000	165m	Forest Core	4160049
826	2019	4	21	2019-04-21	06:22:44	Leopardus guttulus	Southern little spotted cat	1	G05	661.5	7.461.250	Sirgas 2000	165m	Forest Core	4210053
827	2019	4	21	2019-04-21	19:22:32	Cuniculus paca	Lowland paca	1	G05	661.5	7.461.250	Sirgas 2000	165m	Forest Core	4210058
828	2019	4	30	2019-04-30	05:35:26	Dasypus novemcinctus	Nine-banded armadillo	1	G05	661.5	7.461.250	Sirgas 2000	165m	Forest Core	4300061
829	2019	4	30	2019-04-30	15:27:13	Nasua nasua	Coati	1	G05	661.5	7.461.250	Sirgas 2000	165m	Forest Core	4300066
830	2019	5	8	2019-05-08	21:50:41	Cuniculus paca	Lowland paca	1	G05	661.5	7.461.250	Sirgas 2000	165m	Forest Core	5080085
831	2019	5	9	2019-05-09	13:17:46	Dasyprocta leporina	Red-rumped agouti	1	G05	661.5	7.461.250	Sirgas 2000	165m	Forest Core	5090094
832	2019	5	9	2019-05-09	16:29:01	Dasyprocta leporina	Red-rumped agouti	1	G05	661.5	7.461.250	Sirgas 2000	165m	Forest Core	5090099
833	2019	5	9	2019-05-09	22:45:27	Cuniculus paca	Lowland paca	1	G05	661.5	7.461.250	Sirgas 2000	165m	Forest Core	5090107
834	2019	5	10	2019-05-10	11:36:07	Dasyprocta leporina	Red-rumped agouti	1	G05	661.5	7.461.250	Sirgas 2000	165m	Forest Core	5100131
835	2019	5	12	2019-05-12	07:01:29	Dasyprocta leporina	Red-rumped agouti	1	G05	661.5	7.461.250	Sirgas 2000	165m	Forest Core	5120173
836	2019	5	12	2019-05-12	08:41:34	Dasyprocta leporina	Red-rumped agouti	1	G05	661.5	7.461.250	Sirgas 2000	165m	Forest Core	5120197
837	2019	5	12	2019-05-12	17:23:17	Dasyprocta leporina	Red-rumped agouti	1	G05	661.5	7.461.250	Sirgas 2000	165m	Forest Core	5120205
838	2019	5	13	2019-05-13	07:17:11	Dasyprocta leporina	Red-rumped agouti	1	G05	661.5	7.461.250	Sirgas 2000	165m	Forest Core	5130211
839	2019	5	13	2019-05-13	10:39:34	Dasyprocta leporina	Red-rumped agouti	1	G05	661.5	7.461.250	Sirgas 2000	165m	Forest Core	5130214
840	2019	5	14	2019-05-14	00:33:58	Cuniculus paca	Lowland paca	1	G05	661.5	7.461.250	Sirgas 2000	165m	Forest Core	5140227
841	2019	5	14	2019-05-14	06:39:45	Dasyprocta leporina	Red-rumped agouti	1	G05	661.5	7.461.250	Sirgas 2000	165m	Forest Core	5140237
842	2019	5	14	2019-05-14	07:51:34	Dasyprocta leporina	Red-rumped agouti	1	G05	661.5	7.461.250	Sirgas 2000	165m	Forest Core	5140245
843	2019	5	14	2019-05-14	11:37:29	Dasyprocta leporina	Red-rumped agouti	1	G05	661.5	7.461.250	Sirgas 2000	165m	Forest Core	5140255
846	2019	5	15	2019-05-15	06:40:30	Dasyprocta leporina	Red-rumped agouti	1	G05	661.5	7.461.250	Sirgas 2000	165m	Forest Core	5150279
847	2019	5	15	2019-05-15	09:20:33	Dasyprocta leporina	Red-rumped agouti	1	G05	661.5	7.461.250	Sirgas 2000	165m	Forest Core	5150294
848	2019	5	15	2019-05-15	14:46:49	Dasyprocta leporina	Red-rumped agouti	1	G05	661.5	7.461.250	Sirgas 2000	165m	Forest Core	5150309
849	2019	5	16	2019-05-16	14:05:04	Dasyprocta leporina	Red-rumped agouti	1	G05	661.5	7.461.250	Sirgas 2000	165m	Forest Core	5160317
850	2019	5	16	2019-05-16	15:49:28	Dasyprocta leporina	Red-rumped agouti	1	G05	661.5	7.461.250	Sirgas 2000	165m	Forest Core	5160321
851	2019	5	17	2019-05-17	11:28:37	Dasyprocta leporina	Red-rumped agouti	1	G05	661.5	7.461.250	Sirgas 2000	165m	Forest Core	5170342
852	2019	5	17	2019-05-17	16:36:52	Dasyprocta leporina	Red-rumped agouti	1	G05	661.5	7.461.250	Sirgas 2000	165m	Forest Core	5170361
853	2019	5	18	2019-05-18	07:27:48	Dasyprocta leporina	Red-rumped agouti	1	G05	661.5	7.461.250	Sirgas 2000	165m	Forest Core	5180377
854	2019	5	18	2019-05-18	08:35:10	Dasyprocta leporina	Red-rumped agouti	1	G05	661.5	7.461.250	Sirgas 2000	165m	Forest Core	5180393
855	2019	5	18	2019-05-18	11:13:24	Dasyprocta leporina	Red-rumped agouti	1	G05	661.5	7.461.250	Sirgas 2000	165m	Forest Core	5180401
856	2019	5	18	2019-05-18	16:04:38	Dasyprocta leporina	Red-rumped agouti	1	G05	661.5	7.461.250	Sirgas 2000	165m	Forest Core	5180413
857	2019	5	19	2019-05-19	17:04:03	Cuniculus paca	Lowland paca	1	G05	661.5	7.461.250	Sirgas 2000	165m	Forest Core	5190421
858	2019	5	20	2019-05-20	08:34:36	Dasyprocta leporina	Red-rumped agouti	1	G05	661.5	7.461.250	Sirgas 2000	165m	Forest Core	5200425
859	2019	5	20	2019-05-20	10:14:47	Dasyprocta leporina	Red-rumped agouti	1	G05	661.5	7.461.250	Sirgas 2000	165m	Forest Core	5200433
860	2019	5	31	2019-05-31	21:37:26	Cuniculus paca	Lowland paca	1	G05	661.5	7.461.250	Sirgas 2000	165m	Forest Core	5310467
861	2019	6	3	2019-06-03	07:04:01	Dasyprocta leporina	Red-rumped agouti	1	G05	661.5	7.461.250	Sirgas 2000	165m	Forest Core	6030487
862	2019	6	10	2019-06-10	07:45:44	Dasyprocta leporina	Red-rumped agouti	1	G05	661.5	7.461.250	Sirgas 2000	165m	Forest Core	6100498
863	2019	6	16	2019-06-16	18:23:52	Cuniculus paca	Lowland paca	1	G05	661.5	7.461.250	Sirgas 2000	165m	Forest Core	6160502
864	2019	6	16	2019-06-16	20:40:23	Nasua nasua	Coati	1	G05	661.5	7.461.250	Sirgas 2000	165m	Forest Core	6160506
865	2019	6	20	2019-06-20	19:16:42	Cuniculus paca	Lowland paca	1	G05	661.5	7.461.250	Sirgas 2000	165m	Forest Core	6200510
866	2019	6	23	2019-06-23	08:46:06	Canis familiaris	Domestic dog	1	G05	661.5	7.461.250	Sirgas 2000	165m	Forest Core	6230517
867	2019	6	23	2019-06-23	22:31:05	Cuniculus paca	Lowland paca	1	G05	661.5	7.461.250	Sirgas 2000	165m	Forest Core	6230523
868	2019	6	26	2019-06-26	19:49:11	Tamandua tetradactyla	Southern tamandua	1	G05	661.5	7.461.250	Sirgas 2000	165m	Forest Core	6260527
869	2019	6	27	2019-06-27	19:03:23	Cuniculus paca	Lowland paca	1	G05	661.5	7.461.250	Sirgas 2000	165m	Forest Core	6270531
870	2019	6	29	2019-06-29	23:53:18	Cuniculus paca	Lowland paca	1	G05	661.5	7.461.250	Sirgas 2000	165m	Forest Core	6290538
871	2019	7	1	2019-07-01	20:58:42	Cuniculus paca	Lowland paca	1	G05	661.5	7.461.250	Sirgas 2000	165m	Forest Core	7010543
872	2019	7	3	2019-07-03	02:31:16	Cuniculus paca	Lowland paca	1	G05	661.5	7.461.250	Sirgas 2000	165m	Forest Core	7030547
873	2019	7	3	2019-07-03	21:41:44	Tamandua tetradactyla	Southern tamandua	1	G05	661.5	7.461.250	Sirgas 2000	165m	Forest Core	7030549
874	2019	7	8	2019-07-08	00:17:25	Cuniculus paca	Lowland paca	1	G05	661.5	7.461.250	Sirgas 2000	165m	Forest Core	7080554
875	2019	7	8	2019-07-08	16:06:26	Dasyprocta leporina	Red-rumped agouti	1	G05	661.5	7.461.250	Sirgas 2000	165m	Forest Core	7080559
876	2019	7	9	2019-07-09	00:05:25	Cuniculus paca	Lowland paca	1	G05	661.5	7.461.250	Sirgas 2000	165m	Forest Core	7090566
877	2019	7	9	2019-07-09	11:19:13	Canis familiaris	Domestic dog	1	G05	661.5	7.461.250	Sirgas 2000	165m	Forest Core	7090565
878	2019	7	13	2019-07-13	01:08:28	Cuniculus paca	Lowland paca	1	G05	661.5	7.461.250	Sirgas 2000	165m	Forest Core	7130579
879	2019	7	14	2019-07-14	01:29:45	Cuniculus paca	Lowland paca	1	G05	661.5	7.461.250	Sirgas 2000	165m	Forest Core	7140587
880	2019	7	16	2019-07-16	23:33:21	Cuniculus paca	Lowland paca	1	G05	661.5	7.461.250	Sirgas 2000	165m	Forest Core	7160611
881	2019	7	17	2019-07-17	14:28:52	Dasyprocta leporina	Red-rumped agouti	1	G05	661.5	7.461.250	Sirgas 2000	165m	Forest Core	7170633
882	2019	7	17	2019-07-17	19:01:18	Cuniculus paca	Lowland paca	1	G05	661.5	7.461.250	Sirgas 2000	165m	Forest Core	7170638
883	2019	7	20	2019-07-20	15:02:27	Dasyprocta leporina	Red-rumped agouti	1	G05	661.5	7.461.250	Sirgas 2000	165m	Forest Core	7200650
884	2019	7	22	2019-07-22	14:16:06	Nasua nasua	Coati	1	G05	661.5	7.461.250	Sirgas 2000	165m	Forest Core	7220658
885	2019	7	22	2019-07-22	18:33:45	Cuniculus paca	Lowland paca	1	G05	661.5	7.461.250	Sirgas 2000	165m	Forest Core	7220661
886	2019	7	22	2019-07-22	21:41:26	Cuniculus paca	Lowland paca	1	G05	661.5	7.461.250	Sirgas 2000	165m	Forest Core	7220679
887	2019	7	24	2019-07-24	19:34:21	Cuniculus paca	Lowland paca	1	G05	661.5	7.461.250	Sirgas 2000	165m	Forest Core	7240682
888	2019	7	29	2019-07-29	22:54:53	Cuniculus paca	Lowland paca	1	G05	661.5	7.461.250	Sirgas 2000	165m	Forest Core	7290691
889	2019	8	2	2019-08-02	00:47:39	Cuniculus paca	Lowland paca	1	G05	661.5	7.461.250	Sirgas 2000	165m	Forest Core	8020695
890	2019	8	2	2019-08-02	02:47:52	Dasypus novemcinctus	Nine-banded armadillo	1	G05	661.5	7.461.250	Sirgas 2000	165m	Forest Core	8020698
891	2019	8	8	2019-08-08	20:28:12	Cuniculus paca	Lowland paca	1	G05	661.5	7.461.250	Sirgas 2000	165m	Forest Core	8080703
892	2019	8	10	2019-08-10	04:22:10	Dasypus novemcinctus	Nine-banded armadillo	1	G05	661.5	7.461.250	Sirgas 2000	165m	Forest Core	8100706
893	2019	8	12	2019-08-12	08:52:27	Dasyprocta leporina	Red-rumped agouti	1	G05	661.5	7.461.250	Sirgas 2000	165m	Forest Core	8120717
894	2019	8	14	2019-08-14	02:20:15	Cuniculus paca	Lowland paca	1	G05	661.5	7.461.250	Sirgas 2000	165m	Forest Core	8140721
895	2019	8	14	2019-08-14	19:05:40	Cuniculus paca	Lowland paca	1	G05	661.5	7.461.250	Sirgas 2000	165m	Forest Core	8140726
896	2019	8	15	2019-08-15	06:46:22	Dasyprocta leporina	Red-rumped agouti	1	G05	661.5	7.461.250	Sirgas 2000	165m	Forest Core	8150730
897	2019	8	17	2019-08-17	20:38:54	Didelphis aurita	Big-eared opossum	1	G05	661.5	7.461.250	Sirgas 2000	165m	Forest Core	8170741
898	2019	8	20	2019-08-20	10:42:39	Dasyprocta leporina	Red-rumped agouti	1	G05	661.5	7.461.250	Sirgas 2000	165m	Forest Core	8200750
899	2019	8	21	2019-08-21	10:29:56	Nasua nasua	Coati	1	G05	661.5	7.461.250	Sirgas 2000	165m	Forest Core	8210769
900	2019	8	24	2019-08-24	05:44:48	Cuniculus paca	Lowland paca	1	G05	661.5	7.461.250	Sirgas 2000	165m	Forest Core	8240778
901	2019	8	25	2019-08-25	01:11:58	Cuniculus paca	Lowland paca	1	G05	661.5	7.461.250	Sirgas 2000	165m	Forest Core	8250781
1063	2019	10	27	2019-10-27	21:24:22	Didelphis aurita	Big-eared opossum	1	G05	661.5	7.461.250	Sirgas 2000	165m	Forest Core	10270342
1064	2019	10	31	2019-10-31	09:20:41	Dasyprocta leporina	Red-rumped agouti	1	G05	661.5	7.461.250	Sirgas 2000	165m	Forest Core	10310366
1065	2019	11	1	2019-11-01	13:44:52	Dasyprocta leporina	Red-rumped agouti	1	G05	661.5	7.461.250	Sirgas 2000	165m	Forest Core	11010370
1066	2019	11	1	2019-11-06	20:21:06	Cuniculus paca	Lowland paca	1	G05	661.5	7.461.250	Sirgas 2000	165m	Forest Core	11060390
1067	2019	11	8	2019-11-08	11:35:48	Dasyprocta leporina	Red-rumped agouti	1	G05	661.5	7.461.250	Sirgas 2000	165m	Forest Core	11080398
1068	2019	11	9	2019-11-09	01:27:50	Cuniculus paca	Lowland paca	1	G05	661.5	7.461.250	Sirgas 2000	165m	Forest Core	11090411
1069	2019	11	9	2019-11-09	05:55:31	Dasyprocta leporina	Red-rumped agouti	1	G05	661.5	7.461.250	Sirgas 2000	165m	Forest Core	11090416
1070	2019	11	10	2019-11-10	10:32:52	Dasyprocta leporina	Red-rumped agouti	1	G05	661.5	7.461.250	Sirgas 2000	165m	Forest Core	11100448
1071	2019	11	11	2019-11-11	01:44:39	Cuniculus paca	Lowland paca	1	G05	661.5	7.461.250	Sirgas 2000	165m	Forest Core	11110470
1072	2019	11	11	2019-11-11	09:42:34	Dasyprocta leporina	Red-rumped agouti	1	G05	661.5	7.461.250	Sirgas 2000	165m	Forest Core	11110476
1073	2019	11	14	2019-11-14	19:51:14	Cuniculus paca	Lowland paca	1	G05	661.5	7.461.250	Sirgas 2000	165m	Forest Core	11140538
1074	2019	11	16	2019-11-16	20:47:16	Cuniculus paca	Lowland paca	1	G05	661.5	7.461.250	Sirgas 2000	165m	Forest Core	11160626
1075	2019	11	17	2019-11-17	23:39:12	Didelphis aurita	Big-eared opossum	1	G05	661.5	7.461.250	Sirgas 2000	165m	Forest Core	11170674
1076	2019	11	18	2019-11-18	03:25:08	Didelphis aurita	Big-eared opossum	1	G05	661.5	7.461.250	Sirgas 2000	165m	Forest Core	11180680
1077	2019	11	20	2019-11-20	21:52:08	Dasypus novemcinctus	Nine-banded armadillo	1	G05	661.5	7.461.250	Sirgas 2000	165m	Forest Core	11200831
1078	2019	11	22	2019-11-22	10:47:08	Dasyprocta leporina	Red-rumped agouti	1	G05	661.5	7.461.250	Sirgas 2000	165m	Forest Core	11220866
1079	2019	11	25	2019-11-25	00:54:14	Didelphis aurita	Big-eared opossum	1	G05	661.5	7.461.250	Sirgas 2000	165m	Forest Core	11250938
910	2018	9	24	2018-09-24	01:31:57	Didelphis aurita	Big-eared opossum	1	G06	661.5	7.461.250	Sirgas 2000	190m	Forest Core	9240265
911	2018	9	24	2018-09-24	11:56:57	Nasua nasua	Coati	1	G06	661.5	7.461.250	Sirgas 2000	190m	Forest Core	9240266
913	2018	10	2	2018-10-02	23:23:44	Tamandua tetradactyla	Southern tamandua	1	G06	661.5	7.461.250	Sirgas 2000	190m	Forest Core	10020275
914	2019	1	25	2019-01-25	20:39:04	Didelphis aurita	Big-eared opossum	1	H04	661.25	7.461.000	Sirgas 2000	270m	Forest Core	9190465
915	2019	1	27	2019-01-27	01:40:08	Cuniculus paca	Lowland paca	2	H04	661.25	7.461.000	Sirgas 2000	270m	Forest Core	9200472
916	2019	1	29	2019-01-29	23:46:36	Cuniculus paca	Lowland paca	1	H04	661.25	7.461.000	Sirgas 2000	270m	Forest Core	9230474
917	2019	1	30	2019-01-30	01:08:46	Cuniculus paca	Lowland paca	1	H04	661.25	7.461.000	Sirgas 2000	270m	Forest Core	9230477
918	2019	2	1	2019-02-01	02:16:15	Canis familiaris	Domestic dog	2	H04	661.25	7.461.000	Sirgas 2000	270m	Forest Core	9250482
919	2019	2	4	2019-02-04	02:22:12	Procyon cancrivorus	Crab-eating raccoon	1	H04	661.25	7.461.000	Sirgas 2000	270m	Forest Core	9290485
1080	2019	4	7	2019-04-07	12:09:57	Nasua nasua	Coati	1	H04	661.25	7.461.000	Sirgas 2000	270m	Forest Core	4070009
1081	2019	4	7	2019-04-07	22:32:14	Leopardus guttulus	Southern little spotted cat	1	H04	661.25	7.461.000	Sirgas 2000	270m	Forest Core	4070018
1082	2019	4	10	2019-04-10	08:18:54	Dasyprocta leporina	Red-rumped agouti	1	H04	661.25	7.461.000	Sirgas 2000	270m	Forest Core	4100021
1083	2019	4	11	2019-04-11	10:25:28	Canis familiaris	Domestic dog	2	H04	661.25	7.461.000	Sirgas 2000	270m	Forest Core	4110027
1084	2019	4	12	2019-04-12	10:09:13	Canis familiaris	Domestic dog	1	H04	661.25	7.461.000	Sirgas 2000	270m	Forest Core	4120037
1085	2019	4	15	2019-04-15	23:02:55	Tamandua tetradactyla	Southern tamandua	1	H04	661.25	7.461.000	Sirgas 2000	270m	Forest Core	4150054
1086	2019	4	22	2019-04-22	10:06:11	Dasyprocta leporina	Red-rumped agouti	1	H04	661.25	7.461.000	Sirgas 2000	270m	Forest Core	4220075
1087	2019	4	23	2019-04-23	00:15:52	Cuniculus paca	Lowland paca	1	H04	661.25	7.461.000	Sirgas 2000	270m	Forest Core	4230090
1088	2019	4	23	2019-04-23	12:32:05	Dasyprocta leporina	Red-rumped agouti	1	H04	661.25	7.461.000	Sirgas 2000	270m	Forest Core	4230099
1089	2019	4	23	2019-04-23	15:35:35	Leopardus guttulus	Southern little spotted cat	1	H04	661.25	7.461.000	Sirgas 2000	270m	Forest Core	4230102
1090	2019	4	23	2019-04-23	18:29:36	Cuniculus paca	Lowland paca	1	H04	661.25	7.461.000	Sirgas 2000	270m	Forest Core	4230106
1091	2019	4	24	2019-04-24	12:37:14	Canis familiaris	Domestic dog	1	H04	661.25	7.461.000	Sirgas 2000	270m	Forest Core	4240110
1092	2019	4	24	2019-04-24	22:30:14	Cuniculus paca	Lowland paca	1	H04	661.25	7.461.000	Sirgas 2000	270m	Forest Core	4240115
1093	2019	4	26	2019-04-26	07:19:55	Dasyprocta leporina	Red-rumped agouti	1	H04	661.25	7.461.000	Sirgas 2000	270m	Forest Core	4260119
1094	2019	4	26	2019-04-26	22:07:49	Didelphis aurita	Big-eared opossum	1	H04	661.25	7.461.000	Sirgas 2000	270m	Forest Core	4260121
1095	2019	4	27	2019-04-27	03:12:41	Cuniculus paca	Lowland paca	1	H04	661.25	7.461.000	Sirgas 2000	270m	Forest Core	4270126
1096	2019	4	29	2019-04-29	01:27:30	Canis familiaris	Domestic dog	2	H04	661.25	7.461.000	Sirgas 2000	270m	Forest Core	4290130
1097	2019	4	30	2019-04-30	02:28:08	Cuniculus paca	Lowland paca	1	H04	661.25	7.461.000	Sirgas 2000	270m	Forest Core	4300135
1098	2019	5	1	2019-05-01	09:25:49	Dasyprocta leporina	Red-rumped agouti	1	H04	661.25	7.461.000	Sirgas 2000	270m	Forest Core	5010138
1099	2019	5	1	2019-05-01	16:56:26	Nasua nasua	Coati	2	H04	661.25	7.461.000	Sirgas 2000	270m	Forest Core	5010142
1100	2019	5	2	2019-05-02	03:14:48	Cuniculus paca	Lowland paca	1	H04	661.25	7.461.000	Sirgas 2000	270m	Forest Core	5020147
1101	2019	5	3	2019-05-03	00:55:46	Cuniculus paca	Lowland paca	1	H04	661.25	7.461.000	Sirgas 2000	270m	Forest Core	5030151
1102	2019	5	3	2019-05-03	16:00:55	Canis familiaris	Domestic dog	2	H04	661.25	7.461.000	Sirgas 2000	270m	Forest Core	5030154
1103	2019	5	3	2019-05-03	16:56:49	Dasyprocta leporina	Red-rumped agouti	1	H04	661.25	7.461.000	Sirgas 2000	270m	Forest Core	5030163
1104	2019	5	4	2019-05-04	01:04:32	Cuniculus paca	Lowland paca	1	H04	661.25	7.461.000	Sirgas 2000	270m	Forest Core	5040167
1105	2019	5	5	2019-05-05	15:27:42	Canis familiaris	Domestic dog	1	H04	661.25	7.461.000	Sirgas 2000	270m	Forest Core	5050169
1106	2019	5	7	2019-05-07	23:43:54	Cuniculus paca	Lowland paca	1	H04	661.25	7.461.000	Sirgas 2000	270m	Forest Core	5070178
1107	2019	5	9	2019-05-09	00:28:39	Cuniculus paca	Lowland paca	1	H04	661.25	7.461.000	Sirgas 2000	270m	Forest Core	5090187
1108	2019	5	10	2019-05-10	09:27:03	Dasyprocta leporina	Red-rumped agouti	1	H04	661.25	7.461.000	Sirgas 2000	270m	Forest Core	5100189
1109	2019	5	16	2019-05-16	12:16:47	Canis familiaris	Domestic dog	1	H04	661.25	7.461.000	Sirgas 2000	270m	Forest Core	5160194
1110	2019	5	18	2019-05-18	07:05:09	Dasyprocta leporina	Red-rumped agouti	1	H04	661.25	7.461.000	Sirgas 2000	270m	Forest Core	5180197
1111	2019	5	19	2019-05-19	08:27:58	Canis familiaris	Domestic dog	1	H04	661.25	7.461.000	Sirgas 2000	270m	Forest Core	5190205
1112	2019	5	20	2019-05-20	12:19:43	Canis familiaris	Domestic dog	1	H04	661.25	7.461.000	Sirgas 2000	270m	Forest Core	5200209
1113	2019	5	22	2019-05-22	09:47:49	Dasyprocta leporina	Red-rumped agouti	1	H04	661.25	7.461.000	Sirgas 2000	270m	Forest Core	5220217
1114	2019	5	24	2019-05-24	05:01:16	Cuniculus paca	Lowland paca	1	H04	661.25	7.461.000	Sirgas 2000	270m	Forest Core	5240225
1115	2019	5	24	2019-05-24	19:02:21	Cuniculus paca	Lowland paca	1	H04	661.25	7.461.000	Sirgas 2000	270m	Forest Core	5240230
1116	2019	5	25	2019-05-25	02:45:16	Cuniculus paca	Lowland paca	1	H04	661.25	7.461.000	Sirgas 2000	270m	Forest Core	5250234
1117	2019	5	25	2019-05-25	04:24:50	Cuniculus paca	Lowland paca	1	H04	661.25	7.461.000	Sirgas 2000	270m	Forest Core	5250237
1118	2019	5	25	2019-05-25	20:11:44	Cuniculus paca	Lowland paca	1	H04	661.25	7.461.000	Sirgas 2000	270m	Forest Core	5250242
1119	2019	5	26	2019-05-26	10:02:43	Dasyprocta leporina	Red-rumped agouti	1	H04	661.25	7.461.000	Sirgas 2000	270m	Forest Core	5260245
1120	2019	5	28	2019-05-28	14:14:42	Canis familiaris	Domestic dog	2	H04	661.25	7.461.000	Sirgas 2000	270m	Forest Core	5280254
1121	2019	5	29	2019-05-29	06:38:40	Dasyprocta leporina	Red-rumped agouti	1	H04	661.25	7.461.000	Sirgas 2000	270m	Forest Core	5290257
1122	2019	5	29	2019-05-29	20:32:13	Didelphis aurita	Big-eared opossum	1	H04	661.25	7.461.000	Sirgas 2000	270m	Forest Core	5290269
1123	2019	5	29	2019-05-29	23:45:40	Cuniculus paca	Lowland paca	1	H04	661.25	7.461.000	Sirgas 2000	270m	Forest Core	5290273
1124	2019	5	31	2019-05-31	07:38:17	Dasyprocta leporina	Red-rumped agouti	1	H04	661.25	7.461.000	Sirgas 2000	270m	Forest Core	5310278
1125	2019	5	31	2019-05-31	19:12:47	Cuniculus paca	Lowland paca	1	H04	661.25	7.461.000	Sirgas 2000	270m	Forest Core	5310287
1126	2019	6	3	2019-06-03	01:42:39	Cuniculus paca	Lowland paca	1	H04	661.25	7.461.000	Sirgas 2000	270m	Forest Core	6030297
1127	2019	6	3	2019-06-03	07:34:04	Dasyprocta leporina	Red-rumped agouti	1	H04	661.25	7.461.000	Sirgas 2000	270m	Forest Core	6030303
1128	2019	6	4	2019-06-04	03:40:22	Cuniculus paca	Lowland paca	1	H04	661.25	7.461.000	Sirgas 2000	270m	Forest Core	6040306
1129	2019	6	5	2019-06-05	01:54:55	Procyon cancrivorus	Crab-eating raccoon	1	H04	661.25	7.461.000	Sirgas 2000	270m	Forest Core	6050310
1130	2019	6	5	2019-06-05	18:10:51	Cuniculus paca	Lowland paca	1	H04	661.25	7.461.000	Sirgas 2000	270m	Forest Core	6050319
1131	2019	6	7	2019-06-07	08:44:06	Dasyprocta leporina	Red-rumped agouti	1	H04	661.25	7.461.000	Sirgas 2000	270m	Forest Core	6070327
1132	2019	6	10	2019-06-10	10:58:14	Dasyprocta leporina	Red-rumped agouti	1	H04	661.25	7.461.000	Sirgas 2000	270m	Forest Core	6100335
1133	2019	6	14	2019-06-14	01:58:32	Cuniculus paca	Lowland paca	1	H04	661.25	7.461.000	Sirgas 2000	270m	Forest Core	6140343
1134	2019	6	15	2019-06-15	21:04:13	Cuniculus paca	Lowland paca	1	H04	661.25	7.461.000	Sirgas 2000	270m	Forest Core	6150350
1135	2019	6	15	2019-06-15	22:13:53	Didelphis aurita	Big-eared opossum	1	H04	661.25	7.461.000	Sirgas 2000	270m	Forest Core	6150354
1136	2019	6	16	2019-06-16	10:37:40	Dasyprocta leporina	Red-rumped agouti	1	H04	661.25	7.461.000	Sirgas 2000	270m	Forest Core	6160357
1137	2019	6	16	2019-06-16	10:38:38	Canis familiaris	Domestic dog	1	H04	661.25	7.461.000	Sirgas 2000	270m	Forest Core	6160361
1138	2019	6	16	2019-06-16	20:45:07	Cuniculus paca	Lowland paca	1	H04	661.25	7.461.000	Sirgas 2000	270m	Forest Core	6160370
1139	2019	6	18	2019-06-18	21:27:16	Cuniculus paca	Lowland paca	1	H04	661.25	7.461.000	Sirgas 2000	270m	Forest Core	6180374
1140	2019	6	22	2019-06-22	03:43:16	Canis familiaris	Domestic dog	1	H04	661.25	7.461.000	Sirgas 2000	270m	Forest Core	6220385
1141	2019	6	22	2019-06-22	12:21:09	Canis familiaris	Domestic dog	1	H04	661.25	7.461.000	Sirgas 2000	270m	Forest Core	6220389
1142	2019	6	23	2019-06-23	04:13:34	Cuniculus paca	Lowland paca	1	H04	661.25	7.461.000	Sirgas 2000	270m	Forest Core	6230394
1143	2019	6	23	2019-06-23	23:35:36	Canis familiaris	Domestic dog	1	H04	661.25	7.461.000	Sirgas 2000	270m	Forest Core	6230397
1144	2019	6	26	2019-06-26	18:36:59	Cuniculus paca	Lowland paca	1	H04	661.25	7.461.000	Sirgas 2000	270m	Forest Core	6260418
1145	2019	6	28	2019-06-28	00:01:16	Dasypus novemcinctus	Nine-banded armadillo	1	H04	661.25	7.461.000	Sirgas 2000	270m	Forest Core	6270421
1146	2019	6	28	2019-06-28	02:56:17	Cuniculus paca	Lowland paca	1	H04	661.25	7.461.000	Sirgas 2000	270m	Forest Core	6280434
1147	2019	6	28	2019-06-28	19:39:52	Cuniculus paca	Lowland paca	1	H04	661.25	7.461.000	Sirgas 2000	270m	Forest Core	6280438
1148	2019	6	29	2019-06-29	04:54:42	Canis familiaris	Domestic dog	1	H04	661.25	7.461.000	Sirgas 2000	270m	Forest Core	6290454
1149	2019	6	30	2019-06-30	15:57:53	Dasyprocta leporina	Red-rumped agouti	1	H04	661.25	7.461.000	Sirgas 2000	270m	Forest Core	6300469
1150	2019	7	1	2019-07-01	21:06:16	Cuniculus paca	Lowland paca	1	H04	661.25	7.461.000	Sirgas 2000	270m	Forest Core	7010473
1151	2019	7	3	2019-07-03	23:23:01	Cuniculus paca	Lowland paca	1	H04	661.25	7.461.000	Sirgas 2000	270m	Forest Core	7030481
1152	2019	7	4	2019-07-04	17:06:52	Canis familiaris	Domestic dog	1	H04	661.25	7.461.000	Sirgas 2000	270m	Forest Core	7040486
1153	2019	7	5	2019-07-05	15:08:13	Dasyprocta leporina	Red-rumped agouti	1	H04	661.25	7.461.000	Sirgas 2000	270m	Forest Core	7050493
1154	2019	7	5	2019-07-05	23:30:21	Cuniculus paca	Lowland paca	1	H04	661.25	7.461.000	Sirgas 2000	270m	Forest Core	7050501
1155	2019	7	8	2019-07-08	14:48:51	Dasyprocta leporina	Red-rumped agouti	1	H04	661.25	7.461.000	Sirgas 2000	270m	Forest Core	7080506
1156	2019	7	9	2019-07-09	11:53:14	Canis familiaris	Domestic dog	1	H04	661.25	7.461.000	Sirgas 2000	270m	Forest Core	7090509
1157	2019	7	9	2019-07-09	19:13:33	Cuniculus paca	Lowland paca	1	H04	661.25	7.461.000	Sirgas 2000	270m	Forest Core	7090517
1158	2019	7	11	2019-07-11	11:44:45	Canis familiaris	Domestic dog	1	H04	661.25	7.461.000	Sirgas 2000	270m	Forest Core	7110521
1159	2019	7	11	2019-07-11	14:17:44	Dasyprocta leporina	Red-rumped agouti	1	H04	661.25	7.461.000	Sirgas 2000	270m	Forest Core	7110529
